# Supplementary material
Source: publisher figshare collection journal article supplement (https://gsapubs.figshare.com/articles/dataset/_/22151891)
Supplement: Supplementary file 1 [file 1]

## Sheet: Unfiltered mafic magma data
Sample	Reference	On-craton	Age (Ma)	Longitude (°E)	Latitude (°N)	εNd(t)	SiO2	TiO2	Al2O3	FeOT	MnO	MgO	CaO	Na2O	K2O	P2O5	LOI	Total
09XC18	Cai et al., 2013	Yes	92	117.94	36.83	0.44	43.54	2.2	12.92	10.386	0.14	9.92	9.56	2.88	1.3	0.62	4.92	99.54
09XC17	Cai et al., 2013	Yes	92	117.94	36.83	0.11	44.65	1.68	13.65	11.124	0.15	9.16	9.18	2.64	1.18	0.41	4.33	99.39
09SZ06	Cai et al., 2013	Yes	116.5	119.94	37.18	-14.03	45.97	0.92	13.16	7.281	0.12	9.47	7.67	2.2	2.62	0.44	8.82	99.48
09S71	Cai et al., 2013	Yes	92	119.94	37.18	0.17	50.06	1.39	13.31	8.865	0.14	7.5	8.49	2.95	1.03	0.33	5.05	100.1
09S124	Cai et al., 2013	Yes	92	119.94	37.18		41.48	1.93	15.62	10.638	0.16	4.13	7.97	3.47	1.29	0.38	11.83	100.08
09QX01	Cai et al., 2013	Yes	117	119.94	37.18	-13.6	55.44	0.73	14.99	6.012	0.11	6.88	7.23	2.81	2.96	0.36	1.26	99.45
09M09	Cai et al., 2013	Yes	116.5	120.48	37.42	-18.08	56.46	0.64	12.59	5.022	0.15	6.86	5.92	2.32	4.6	0.61	3.82	99.55
09M06	Cai et al., 2013	Yes	116	120.48	37.42	-14.03	48.89	0.79	13.38	6.588	0.12	8.25	7.41	3.9	2.11	0.28	7.63	100.08
09M01	Cai et al., 2013	Yes	116.5	120.48	37.42	-16.01	49.54	0.73	13.72	6.543	0.12	8.33	8.42	2.18	1.75	0.18	7.33	99.57
09J87	Cai et al., 2013	Yes	92	119.94	37.18	2.16	47.93	2.15	15.19	10.44	0.15	6.04	9.27	3.23	1.1	0.54	2.28	99.48
09J86	Cai et al., 2013	Yes	92	119.94	37.18	3.12	47.56	2.05	14.42	10.53	0.17	7.08	9.56	2.85	0.93	0.51	2.82	99.65
09J76	Cai et al., 2013	Yes	95	119.94	37.18	0.54	44.57	2.13	15.26	9.522	0.16	6.15	8.46	3.94	2.96	0.98	4.36	99.55
09J59	Cai et al., 2013	Yes	92	119.94	37.18	1.35	41.9	2.34	15.3	12.978	0.12	5.19	7.37	1.89	3.74	0.93	6.17	99.37
09J54	Cai et al., 2013	Yes	87	119.94	37.18	0.56	44.88	2.21	15.35	9.756	0.18	6.01	8.24	4.12	3.06	1.07	3.44	99.4
09DZ63	Cai et al., 2013	Yes	116.5	119.85	37.02	-17.01	48.67	0.81	13.62	7.524	0.13	9.89	8.7	2.26	1.24	0.22	5.86	99.76
09DZ38	Cai et al., 2013	Yes	92	119.85	37.02	5.46	43.1	2.58	12.77	12.132	0.17	7.91	9.03	2.36	1.93	0.78	5.9	100.01
09RS99	Cai et al., 2015	No	113	121.8	36.95		48.5	0.9	14.2	6.39	0.1	6.8	6.8	2.4	3.6	0.4	8.6	99.4
09RS67	Cai et al., 2015	No	113	121.8	36.95		50.8	0.9	16.6	6.39	0.1	3.5	6.6	3.5	3	0.7	6.7	99.5
09RS64	Cai et al., 2015	No	113	121.8	36.95		48.5	0.9	15.1	6.48	0.1	6.3	6.9	3.2	2.7	0.5	8	99.4
09RS63	Cai et al., 2015	No	113	121.8	36.95		46.2	1.1	15.4	7.11	0.1	7.6	8.7	3.2	3.3	0.6	5.6	99.7
09RS61	Cai et al., 2015	No	113	121.8	36.95		53.8	1.1	15.6	6.75	0.1	5.2	6.8	3.6	3	0.4	2.6	99.7
09RS58	Cai et al., 2015	No	113	121.8	36.95		56.7	0.9	16.5	5.58	0.1	3.2	4.6	4.2	4.5	0.7	1.8	99.4
09RS54	Cai et al., 2015	No	113	121.8	36.95		46.2	1	16	7.74	0.1	5.9	7	3	2.6	0.6	8.5	99.5
09RS37	Cai et al., 2015	No	113	121.8	36.95		59.5	0.7	16	5.04	0.1	3.1	4.7	4.1	4.1	0.6	1	99.5
09RS32	Cai et al., 2015	No	113	121.8	36.95		50.9	1.1	17.5	7.92	0.2	4.4	6.4	3.9	4.1	1.1	0.9	99.3
09RS29	Cai et al., 2015	No	113	121.8	36.95		50.4	1.3	15.4	7.65	0.1	7.1	7.6	3.3	3.4	0.8	1.6	99.5
09RS183	Cai et al., 2015	No	108	121.8	36.95		51.8	0.9	14.6	6.93	0.1	7.4	8.1	2.2	3.2	0.3	3.2	99.6
09RS166	Cai et al., 2015	No	108	121.8	36.95		54.3	1	16.4	5.85	0.1	3.4	4.7	4.7	4	0.9	3.6	99.6
09RS157	Cai et al., 2015	No	108	121.8	36.95		52.5	0.8	15.4	6.39	0.1	5.8	7.2	3.6	2.8	0.5	3.7	99.5
09RS15	Cai et al., 2015	No	113	121.8	36.95		53.8	1	16.7	6.12	0.1	4.8	5.9	4.1	3.5	0.6	2.4	99.7
09RS126-2	Cai et al., 2015	No	108	121.8	36.95		54.5	0.7	16.6	5.85	0.1	4.2	5.3	3.3	4.2	0.5	3.6	99.5
09RS119	Cai et al., 2015	No	108	121.8	36.95		55	0.9	16.4	5.85	0.1	3.6	5.1	4.2	3.8	0.8	3.2	99.6
09RS116	Cai et al., 2015	No	108	121.8	36.95		51.2	0.8	14.7	5.4	0.2	5.5	5.2	2.1	5.6	0.4	7.6	99.3
09RS115	Cai et al., 2015	No	108	121.8	36.95		51.3	0.8	14.5	5.76	0.1	6.2	6	2.3	3.8	0.4	7.6	99.4
09RS111	Cai et al., 2015	No	108	121.8	36.95		51.6	0.8	14.3	5.49	0.1	5.7	6.4	1.8	4.5	0.4	7.9	99.6
09RS110	Cai et al., 2015	No	108	121.8	36.95		51.1	0.9	14.5	6.48	0.1	6.3	6.6	3.2	3.4	0.7	5.5	99.5
09RS108	Cai et al., 2015	No	108	121.8	36.95		53.2	1.1	16.5	6.21	0.1	3.9	5.3	4	4.1	0.9	3.5	99.5
09RS107	Cai et al., 2015	No	113	121.8	36.95		54	0.9	16.5	5.94	0.1	3.5	5.1	4.3	3.9	0.9	3.6	99.4
09RS101	Cai et al., 2015	No	113	121.8	36.95		49	0.9	14.4	6.21	0.1	6.7	6.9	1.8	3.9	0.3	8.9	99.8
09RS100	Cai et al., 2015	No	113	121.8	36.95		55.9	0.9	16.4	5.4	0.1	3.1	4.6	4.1	4.5	0.7	3.2	99.5
AFS22	Chen et al., 2009	No	9.8	118.74	34.38	4.76	41.24	2.6	11.64	12.429	0.2	8.97	9.58	5.92	1.89	1.29	2.43	99.57
AFS21	Chen et al., 2009	No	9.8	118.74	34.38	5.11	40.36	2.57	11.63	12.735	0.2	9.76	10.28	4.88	2.25	1.24	2.63	99.95
AFS13	Chen et al., 2009	No	9.8	118.74	34.38	6.55	42.43	2.36	12.04	11.7	0.17	9.15	9.57	4.56	2.41	1.54	2.46	99.69
AFS12	Chen et al., 2009	No	9.8	118.74	34.38	6.14	40.68	2.92	12.24	12.861	0.19	8.6	9.25	4.79	1.71	0.99	3.88	99.54
AFS11	Chen et al., 2009	No	9.8	118.74	34.38	6.38	40.38	2.84	11.87	12.969	0.19	9.58	9.68	4.3	1.73	0.95	3.71	99.64
AFS10	Chen et al., 2009	No	9.8	118.74	34.38	6.34	42.46	2.37	11.87	11.601	0.18	9.89	9.77	4.22	2.24	1.38	2.43	99.7
AFS09	Chen et al., 2009	No	9.8	118.74	34.38	6.5	41.5	2.64	11.85	12.906	0.2	8.86	9.92	5.76	2.28	1.25	0.92	99.52
AFS07	Chen et al., 2009	No	9.8	118.74	34.38	6.69	41.79	2.63	11.86	12.924	0.2	8.92	9.61	5.79	2.31	1.2	0.92	99.59
AFS05	Chen et al., 2009	No	9.8	118.74	34.38	6.83	41.17	2.61	11.74	12.897	0.21	8.98	10.29	5.15	2.21	1.2	1.68	99.57
SH-19-2B	Choi et al., 2020	Yes	12.05	128.1	42.4		52.01	1.628	14.84	10.332	0.155	7.02	8.65	3.02	0.61	0.2	-0.16	99.453
SH-19-2A	Choi et al., 2020	Yes	12.05	128.1	42.4		50.99	1.632	14.99	10.53	0.146	6.73	8.58	2.93	0.6	0.22	0.34	98.858
SH-19-1B	Choi et al., 2020	Yes	12.05	128.1	42.4		52.48	1.633	15.02	10.746	0.156	7.39	8.5	3.12	0.66	0.22	-0.34	100.779
SH-19-1A	Choi et al., 2020	Yes	12.05	128.1	42.4		51.34	1.704	15.02	10.089	0.149	6.19	9.05	2.98	0.64	0.24	1.82	100.343
SH-18-2B	Choi et al., 2020	Yes	12.05	128.1	42.4		52.47	2.949	12.54	13.716	0.262	3.04	6.86	3.67	1.78	1.53	0.23	100.571
SH-18-2A	Choi et al., 2020	Yes	12.05	128.1	42.4		51.98	2.999	12.66	14.031	0.249	3.06	6.69	3.79	1.63	1.57	0.38	100.598
SH-18-1B	Choi et al., 2020	Yes	12.05	128.1	42.4		50.13	3.622	15.78	10.197	0.199	3.87	7.91	3.66	2.09	0.68	-0.35	98.921
SH-18-1A	Choi et al., 2020	Yes	12.05	128.1	42.4		50.86	3.641	16.04	10.395	0.147	4.12	8.3	3.76	2.13	0.69	-0.45	100.788
SH-18-03	Choi et al., 2020	Yes	12.05	128.1	42.4		48.33	3.309	15.4	10.917	0.156	7.2	8.93	3.04	1.88	0.58	-0.58	100.375
SH-17-1B	Choi et al., 2020	Yes	12.05	128.1	42.4		51.96	2.653	15.96	9.882	0.14	4.95	7.72	3.75	1.87	0.53	-0.51	100.003
SH-17-1A	Choi et al., 2020	Yes	12.05	128.1	42.4		50	2.397	16.39	9.945	0.166	4.6	7.56	3.84	2.5	0.72	0.2	99.423
SH-17-05	Choi et al., 2020	Yes	12.05	128.1	42.4		50.66	1.369	14.71	8.19	0.151	9.07	9.33	3.19	2.13	0.4	0.6	100.71
BDH-01a	Choi et al., 2020	Yes	12.05	128.1	42.4		51.9645	3.01274	14.1886	11.0253	0.154896	4.58331	7.94181	3.15638	1.82398	0.693394	0.089004	99.8589
BDAC04	Choi et al., 2020	Yes	12.05	128.1	42.4		47.9456	3.1229	15.2861	10.5421	0.141008	7.4368	8.8683	3.08617	1.90806	0.5214	-0.0767553	99.9531
BDAC03	Choi et al., 2020	Yes	12.05	128.1	42.4		49.2115	1.26437	14.8707	8.01753	0.139909	9.31283	8.70198	3.415	2.41987	0.433826	1.20372	99.8821
BDAC01	Choi et al., 2020	Yes	12.05	128.1	42.4		48.3567	1.99881	16.1637	10.1512	0.157186	6.92068	7.92422	4.47235	2.30369	0.610678	-0.362698	99.8244
BD-22a	Choi et al., 2020	Yes	12.05	128.1	42.4		51.5344	2.55442	14.7477	10.5873	0.142761	6.07873	7.76301	3.50713	1.39287	0.541494	-0.133312	99.893
BD-21B	Choi et al., 2020	Yes	12.05	128.1	42.4		50.9725	2.68461	14.7546	10.8315	0.144455	6.0343	7.88893	3.60185	1.48686	0.562432	-0.227372	99.9381
BD-21Aa	Choi et al., 2020	Yes	12.05	128.1	42.4		51.4675	2.56376	15.2671	10.4954	0.139278	5.89325	7.85053	3.67399	1.41137	0.548121	-0.616935	99.8595
BD-19B	Choi et al., 2020	Yes	12.05	128.1	42.4		51.1362	2.4806	15.8634	10.1722	0.133696	5.76005	8.04904	3.62795	1.38022	0.520931	-0.372089	99.8825
BD-19A	Choi et al., 2020	Yes	12.05	128.1	42.4		50.9595	2.7173	14.7631	10.8637	0.143685	5.99221	7.83488	3.51713	1.48521	0.583351	-0.128856	99.9382
BD-17a	Choi et al., 2020	Yes	12.05	128.1	42.4		51.0812	2.5957	15.4076	10.4575	0.139468	5.75831	7.97334	3.63318	1.41073	0.54573	-0.336444	99.8282
BD-16	Choi et al., 2020	Yes	12.05	128.1	42.4		53.5829	1.90655	15.2187	9.65131	0.129332	6.52711	7.70723	3.44359	0.63781	0.253157	-0.256523	99.8735
BD-15	Choi et al., 2020	Yes	12.05	128.1	42.4		53.4227	1.95265	14.9033	9.66546	0.131782	6.48291	7.88314	3.52373	0.693894	0.245918	-0.0964359	99.883
BD-13	Choi et al., 2020	Yes	12.05	128.1	42.4		50.5015	2.94862	16.0228	10.1815	0.137175	5.37262	7.99203	3.36804	1.89747	0.490654	-0.109383	99.9344
BD-12	Choi et al., 2020	Yes	12.05	128.1	42.4		53.5425	1.93169	15.196	9.6835	0.131369	6.29222	7.77829	3.47126	0.684187	0.254613	-0.173247	99.8683
BD-08_duplicate	Choi et al., 2020	Yes	12.05	128.1	42.4		52.9777	1.42328	15.1488	9.93888	0.142969	6.63564	8.0282	3.2492	0.836588	0.213565	0.166073	99.8652
BD-08	Choi et al., 2020	Yes	12.05	128.1	42.4		52.9857	1.42041	15.1281	9.93328	0.142969	6.63277	8.02949	3.24159	0.836391	0.211492	0.166073	99.8319
BD-07a	Choi et al., 2020	Yes	12.05	128.1	42.4		52.3435	2.05577	16.1495	8.65865	0.115393	6.06485	8.71311	3.10984	1.26763	0.303467	0.137897	99.8817
BD-06B	Choi et al., 2020	Yes	12.05	128.1	42.4		52.7035	1.43962	14.9081	10.2252	0.151672	6.75412	8.22164	3.32968	0.839522	0.208891	-0.0521105	99.866
BD-06A	Choi et al., 2020	Yes	12.05	128.1	42.4		52.9956	1.44327	14.868	10.3893	0.148237	6.62629	7.91983	3.16849	0.801574	0.212407	0.112576	99.8399
BD-05	Choi et al., 2020	Yes	12.05	128.1	42.4		53.1043	1.39983	15.0968	10.4125	0.150863	6.60951	8.00327	3.23355	0.588831	0.198001	-0.0482606	99.9062
BD-04	Choi et al., 2020	Yes	12.05	128.1	42.4		48.6082	1.13588	14.5956	8.35687	0.14508	10.7133	9.09011	3.27044	1.70082	0.370538	0.943967	99.8594
BD-02	Choi et al., 2020	Yes	12.05	128.1	42.4		51.0028	2.56774	14.5845	10.8184	0.146812	6.16509	7.88904	3.47563	1.39832	0.538886	0	99.7892
BD-01	Choi et al., 2020	Yes	12.05	128.1	42.4		49.3873	3.22826	16.2914	11.8808	0.138177	3.6141	6.73858	3.88235	2.3874	0.612698	0.414988	99.8961
B13-2	Choi et al., 2020	Yes	12.05	128.1	42.4		51.6438	3.2617	14.2732	11.3245	0.1566	4.1753	7.8052	2.9017	1.8646	0.6172	0.33	99.6121
B10-6	Choi et al., 2020	Yes	12.05	128.1	42.4		54.2161	1.9358	14.866	9.60291	0.1292	5.8158	7.5774	3.3465	0.6935	0.3201	0.036	99.6063
B10-4	Choi et al., 2020	Yes	12.05	128.1	42.4		50.2927	2.7102	15.9692	10.3813	0.1507	4.9737	6.71679	3.5747	2.785	0.8936	-0.48	99.1214
B10-2B	Choi et al., 2020	Yes	12.05	128.1	42.4		53.0538	1.5332	14.5891	10.9893	0.1548	6.6519	7.6286	3.0589	0.5443	0.1999	0.11	99.7348
B10-2	Choi et al., 2020	Yes	12.05	128.1	42.4		52.7498	1.4724	14.6116	10.6292	0.1515	7.5993	7.5863	2.8983	0.6369	0.1938	-0.019	99.6911
B10-1	Choi et al., 2020	Yes	12.05	128.1	42.4		49.4671	3.3769	16.0165	12.1185	0.164	4.046	6.61274	3.574	2.1927	0.6348	-0.058	99.4917
YS-15	Chung, 1999	Yes	14	118.04	36.69		45.6	3.03	13.3	10.985	0.16	8.78	9.91	2.3	2.18	0.45	2.15	99.26
LJ-51	Chung, 1999	Yes	14	118.04	36.69		46.6	2.82	13.5	9.365	0.13	9.13	10.9	1.93	1.18	0.38	2.57	98.8
JLHF-1	Chung, 1999	No	9.1	119.23	33.78		52.4	2.17	17.1	7.348	0.1	4.7	8.58	3.78	1.68	0.05	1.01	99.23
JJNF-3	Chung, 1999	No	10.9	119.23	33.78		50.7	2.58	15	10.74	0.1	3.83	8.05	3.83	1.95	0.18	0.99	99.07
JDHA-1	Chung, 1999	No	7.6	119.23	33.78		48.9	3.76	10.83	8.962	0.21	8.64	11.1	2.24	0.58	0.35	3.48	99.26
BL-09	Chung, 1999	Yes	14	120.55	37.18		47.7	2.99	12.2	13.055	0.15	8.01	7.15	3.12	1.23	0.44	2.94	99.93
BL-06	Chung, 1999	Yes	14	120.55	37.18		43.7	2.78	11.7	13.061	0.19	8.37	10	3.56	0.72	0.93	3.86	99.62
AJSQ-2	Chung, 1999	No	15.4	119.23	33.78		51.4	2.71	16.6	5.451	0.08	4.72	10.5	3.86	2.17	0.09	1.09	99.82
AJSN-1	Chung, 1999	No	5.3	119.23	33.78		55.2	3.23	6.23	9.9	0.12	6.32	9.22	1.5	0.94	0.16	4.86	98.4
AJS-3	Chung, 1999	No	65	119.23	33.78		50.8	3.11	14.1	6.854	0.12	4.59	10.6	3.31	1.66	0.22	2.74	98.4
AHFD-2	Chung, 1999	No	35.2	119.23	33.78		50.5	2.12	13.2	8.4	0.12	8.64	10.8	2.16	1.72	0.1	1.14	99.05
SJS-9	Dai et al., 2016	No	125	119.46	35.43		50.62	1.22	12.03	7.614	0.13	9.54	6.7	1.86	5.13	1	0.846	96.69
SJS-5	Dai et al., 2016	No	125	119.46	35.43	-17.6934	51.73	1.23	12.31	7.497	0.13	9.07	6.85	1.99	4.76	1	0.833	97.4
SJS-4	Dai et al., 2016	No	125	119.46	35.43	-18.2478	48.74	1.11	10.45	8.181	0.13	13.79	5.73	0.83	4.81	0.92	0.909	95.6
SJS-3	Dai et al., 2016	No	125	119.46	35.43	-17.9189	48.12	1.12	10.68	8.019	0.13	12.71	5.5	0.66	5.49	0.93	0.891	94.25
SJS-2	Dai et al., 2016	No	125	119.46	35.43	-18.2637	50.23	1.22	12.12	7.56	0.14	8.78	6.36	1.52	4.96	0.99	0.84	94.72
SJS-1	Dai et al., 2016	No	125	119.46	35.43	-17.6456	49.68	1.24	12.07	7.614	0.15	8.92	6.57	1.6	4.68	1.01	0.846	94.38
SD1722	Dai et al., 2016	Yes	6	120.85	37.34	3.2884	39.75	2.54	11.35	12.915	0.21	9.47	11.16	4.84	2.46	1.02	1.435	97.15
SD1721	Dai et al., 2016	Yes	6	120.85	37.34	3.79559	39.44	2.56	12	12.6	0.21	9.65	11.4	4.75	2.51	1.18	1.4	97.7
SD1720	Dai et al., 2016	Yes	6	120.85	37.34	3.89313	39.44	2.54	12.01	12.474	0.2	8.68	12.06	4.69	2.45	1.08	1.386	97.01
SD1619U	Dai et al., 2016	Yes	6	120.85	37.34	1.64978	41.99	2.56	11.9	12.762	0.19	8.95	10.14	5.51	1.6	1.32	1.418	98.34
SD1619	Dai et al., 2016	Yes	6	120.85	37.34		41.46	2.63	11.66	13.122	0.2	8.82	10.61	5.21	2.02	1.43	1.458	98.62
SD1617	Dai et al., 2016	Yes	5	120.76	37.81	2.41057	44.93	3.68	14.38	12.078	0.13	7.04	7.57	5.36	1.1	0.68	1.342	98.29
SD1615	Dai et al., 2016	Yes	5	120.76	37.81	2.95678	43.92	2.5	13.97	12.321	0.17	9.48	9.42	3.73	0.77	0.78	1.369	98.43
SD1614	Dai et al., 2016	Yes	5	120.76	37.81	3.05431	44.16	2.4	13.91	11.925	0.16	8.85	9.03	4.34	1.22	0.79	1.325	98.11
SD1613-2	Dai et al., 2016	Yes	5	120.76	37.81	3.2884	44.36	2.42	14.04	12.105	0.17	8.96	9.15	4.12	1.21	0.79	1.345	98.67
SD1612	Dai et al., 2016	Yes	5	120.76	37.81	3.62003	43.95	2.4	13.81	11.997	0.17	9.61	9.01	4.1	0.83	0.8	1.333	98.01
SD1611	Dai et al., 2016	Yes	5	120.76	37.81	3.2884	44.16	2.29	13.33	11.952	0.18	7.21	9.46	4.42	1.96	1.23	1.328	97.52
M068-4B	Dai et al., 2016	No	73	120.07	36.13		44.64	2.51	14.17	11.406	0.2	9.36	9.04	4.18	1.38	0.66	2.16	100.58
M068-3B	Dai et al., 2016	No	73	120.07	36.13		44.7	2.48	14.22	11.332	0.19	9.22	8.98	4.09	1.68	0.66	1.93	100.35
M068-2B	Dai et al., 2016	No	73	120.07	36.13		44.48	2.46	14.13	11.252	0.19	9.29	8.85	4.21	1.81	0.65	2.02	100.21
M068-1B	Dai et al., 2016	No	73	120.07	36.13		45.29	2.39	14.28	10.888	0.19	9.12	9.22	3.77	2.06	0.61	2	100.66
M042-3B	Dai et al., 2016	No	77	119.41	35.99	-3	47.81	1.88	16.24	9.314	0.11	3.88	8.82	3.773	2.09	0.43	5.99	100.423
M042-1B	Dai et al., 2016	No	77	119.41	35.99	-3.2	47.9	2.06	15.95	9.455	0.13	2.98	8.75	3.89	2.37	0.49	6.26	100.33
M041-6B	Dai et al., 2016	No	77	119.41	35.99	-2.9	50.27	1.88	14.78	9.831	0.12	7.05	7.84	3.54	1.67	0.44	2.74	100.56
M041-5B	Dai et al., 2016	No	77	119.41	35.99	-3	47.13	1.83	15.9	9.89	0.1	3.06	10.7	3.33	2.48	0.42	5.65	100.63
M041-4B	Dai et al., 2016	No	77	119.41	35.99	-3.1	47.07	1.79	15.77	9.321	0.13	3.68	10.46	3.08	2.4	0.42	5.75	100
M041-3B	Dai et al., 2016	No	77	119.41	35.99	-5.1	47.95	1.88	16.06	9.897	0.1	3.1	9.85	3.24	2.56	0.43	4.75	99.97
M041-2B	Dai et al., 2016	No	77	119.41	35.99	-4.1	49.82	1.88	16.27	9.967	0.12	4.33	7.23	3.46	2.63	0.44	3.88	100.21
M041-1B	Dai et al., 2016	No	77	119.41	35.99	-3.3	44.39	1.73	14.55	9.109	0.12	3.55	11.67	3.54	2.34	0.4	8.45	99.98
JXM4	Dai et al., 2016	No	120	119.41	35.99	-19.162	51.49	0.969	16.34	6.651	0.14	5.59	7.59	3	3.175	0.91	2.93	99.524
JXM3	Dai et al., 2016	No	120	118.84	35.58	-18.9526	50.72	0.799	14.69	7.515	0.12	9.86	7.74	2.5	2.286	0.42	2.32	99.805
JNM3	Dai et al., 2016	No	120	118.84	35.58	-16.613	51.5	1.13	15.96	7.839	0.18	6.11	7.44	3.03	3.14	0.47	2.11	99.78
JNM2	Dai et al., 2016	No	120	118.84	35.58	-16.7725	51.65	1.105	15.6	8.064	0.16	6.62	7.67	2.8	2.627	0.46	1.94	99.592
GJ203	Dai et al., 2016	No	114	121.54	36.92	-12.1876	52.89	1.15	16.46	7.715	0.15	5.07	8.86	3.01	1.96	0.55	0.56	98.94
GJ202	Dai et al., 2016	No	114	121.54	36.92		52.71	1.2	16.78	7.665	0.14	4.87	8.56	3.2	2.1	0.59	0.57	98.96
GJ201	Dai et al., 2016	No	114	121.54	36.92		54.49	1.07	16.52	7.36	0.13	4.2	7.83	3.29	2.59	0.55	0.5	99.03
GJ105	Dai et al., 2016	No	114	121.54	36.92	-10.5288	54.78	1.06	16.26	6.87	0.13	5.08	7.66	2.92	3.04	0.54	0.2	99.05
GJ104	Dai et al., 2016	No	114	121.54	36.92	-9.92905	53.85	1.12	16.44	7.56	0.14	4.55	8.31	2.98	2.54	0.56	0.39	98.99
GJ103	Dai et al., 2016	No	114	121.54	36.92	-10.549	53.98	1.21	16.64	7.66	0.14	4.46	8.25	2.91	2.39	0.57	0.32	99.04
GJ102	Dai et al., 2016	No	114	121.54	36.92		53.28	1.12	16.25	7.28	0.14	5.22	8.58	2.97	2.41	0.71	0.56	99.02
GJ101	Dai et al., 2016	No	114	121.54	36.92	-10.7411	53.02	1.15	16.45	7.35	0.14	5.15	8.8	2.96	2.31	0.74	0.48	99.04
08QJFS07	Dai et al., 2016	Yes	6	120.85	37.34		39.5	2.56	11.32	13.302	0.21	10.07	11.21	4	2.2	0.89	2.83	99.57
08QJFS06	Dai et al., 2016	Yes	6	120.85	37.34		39.51	2.48	11.21	13.05	0.2	10.86	11.11	3.7	1.97	0.89	3.15	99.58
08QJFS05	Dai et al., 2016	Yes	6	120.85	37.34		39.49	2.53	11.27	13.266	0.2	10.28	11.35	4.24	2.33	0.87	2.23	99.53
08QJFS04	Dai et al., 2016	Yes	6	120.85	37.34		39.45	2.57	11.19	13.311	0.2	10.25	11.46	4.16	2.33	0.87	2.36	99.63
08QJFS03	Dai et al., 2016	Yes	6	120.85	37.34		39.56	2.52	11.33	13.284	0.2	9.99	11.38	4.14	2.41	0.89	2.33	99.51
08QJFS02	Dai et al., 2016	Yes	6	120.85	37.34		39.74	2.51	11.3	13.185	0.2	9.2	12.57	3.39	1.99	0.85	3.1	99.5
08QJFS01	Dai et al., 2016	Yes	6	120.85	37.34		40.21	2.57	11.41	13.554	0.21	8.99	11.65	5.23	2.79	0.79	1.08	99.99
08NIUS03	Dai et al., 2016	Yes	5	120.76	37.81		45.14	2.91	13.7	12.627	0.15	6.46	8.22	5.54	1.56	1.09	1.18	99.98
08NIUS02	Dai et al., 2016	Yes	5	120.76	37.81		45.02	2.93	13.8	12.978	0.16	6.52	8.03	5.47	1.82	1.16	0.78	100.11
08NIUS01	Dai et al., 2016	Yes	5	120.76	37.81		44.43	2.85	13.26	12.933	0.16	7.32	8.15	5.62	1.93	1.16	0.63	99.88
08LHS07	Dai et al., 2016	Yes	5	120.76	37.81		40.37	2.88	11.23	14.427	0.2	8	11.65	2.94	1.32	1.03	4.34	99.99
08LHS06	Dai et al., 2016	Yes	5	120.76	37.81		39.52	2.8	11.41	13.779	0.19	9.16	11.49	3.43	1.59	1.25	3.85	100
08LHS05	Dai et al., 2016	Yes	5	120.76	37.81		39.36	2.94	11.35	14.454	0.2	8.81	11.31	4.86	2.66	1.13	0.83	99.51
08LHS04	Dai et al., 2016	Yes	5	120.76	37.81		39.15	2.98	11.3	14.391	0.2	9.02	11.38	4.68	2.6	1.17	1.34	99.81
08LHS03	Dai et al., 2016	Yes	5	120.76	37.81		39.42	2.97	11.37	14.382	0.2	8.87	11.06	5.67	2.89	1.3	0.24	99.97
08LHS02	Dai et al., 2016	Yes	5	120.76	37.81		39.49	2.98	11.34	14.4	0.2	8.87	11.08	5.51	2.71	1.39	0.45	100.02
08LHS01	Dai et al., 2016	Yes	5	120.76	37.81		39.38	2.96	11.37	14.373	0.2	8.82	11.02	5.45	2.7	1.29	0.63	99.79
08GDS05	Dai et al., 2016	Yes	5	120.76	37.81		42.68	2.11	12.3	11.808	0.18	10.36	9.98	5.31	1.56	1.21	1	99.81
08GDS04	Dai et al., 2016	Yes	5	120.76	37.81		41.74	2.09	12.23	11.475	0.18	11.3	9.83	4.57	1.52	1.18	2.5	99.89
08GDS03	Dai et al., 2016	Yes	5	120.76	37.81		43.35	2.12	12.45	11.979	0.18	9.43	9.91	4.77	1.25	1.23	1.88	99.88
08GDS02	Dai et al., 2016	Yes	5	120.76	37.81		43.07	2.77	12.58	12.969	0.17	7.87	9.38	4.97	2.2	1.35	1.19	99.96
08GDS01	Dai et al., 2016	Yes	5	120.76	37.81		43	2.78	12.57	13.023	0.17	7.81	9.44	4.76	2.17	1.38	1.54	100.09
YS-7	Dostal et al., 1991	Yes	10.5	118.63	35.79		43.53	2.44	12.78	11.133	0.17	9.98	9.43	2.5	1.99	0.72	2.6	98.51
YS-5	Dostal et al., 1991	Yes	10.5	118.63	35.79		43.91	2.73	13.14	10.872	0.18	10.41	9.31	2.9	2.13	0.64	2.5	99.93
QX-4	Dostal et al., 1991	Yes	6	120.85	37.34		42.15	2.86	12.02	12.141	0.19	9.67	9.95	4.21	1.82	0.98	2.1	99.8
LJ-77	Dostal et al., 1991	Yes	10.5	118.54	36.51		46.66	2.13	13.38	10.827	0.17	10.26	9.15	2.42	1.21	0.33	2.1	99.84
LJ-74	Dostal et al., 1991	Yes	10.5	118.54	36.51		44.47	2.64	13.31	10.359	0.18	11.15	9.7	3.28	1.65	0.56	1.5	99.95
LJ-72	Dostal et al., 1991	Yes	10.5	118.54	36.51		48.01	1.97	13.47	10.053	0.16	10.2	8.95	2.73	1.62	0.31	1.3	99.89
LJ-54	Dostal et al., 1991	Yes	10.5	118.54	36.51		43.68	2.55	12.51	10.836	0.17	12.8	9.47	2.08	1.68	0.43	2.3	99.71
LJ-51	Dostal et al., 1991	Yes	10.5	118.54	36.51		43.67	2.42	12.53	10.224	0.17	11.36	10.38	1.83	1.31	0.43	4.3	99.76
LJ-48	Dostal et al., 1991	Yes	10.5	118.54	36.51		44.41	2.64	13.05	10.575	0.17	11.44	9.53	2.49	1.91	0.51	2.2	100.1
LJ-42	Dostal et al., 1991	Yes	10.5	118.54	36.51		44.6	2.41	13.25	10.917	0.17	9.85	9.72	2.18	1.73	0.39	3.2	99.63
EP-8	Dostal et al., 1991	Yes	6	120.55	37.18		43.78	2.45	12.43	10.962	0.17	8.09	9.87	4.07	1.48	1.23	3.4	99.15
EP-7	Dostal et al., 1991	Yes	6	120.55	37.18		43.51	2.22	12.47	11.466	0.17	8.22	10.24	3.44	1.04	1.14	3.6	98.79
EP-3	Dostal et al., 1991	Yes	6	120.55	37.18		46.16	2.34	13.25	10.782	0.15	8.41	9.13	2.32	1.14	0.97	3.5	99.17
EJIW	Dostal et al., 1991	Yes	6	120.85	37.34		39.84	2.52	11.1	12.312	0.23	10.26	11.49	4.16	2.36	0.8	3.5	99.94
CY-2	Dostal et al., 1991	Yes	10.5	118.54	36.51		45.47	2.24	13.06	10.764	0.15	10.52	9.16	3.14	1.15	0.45	1.5	98.8
CY-1	Dostal et al., 1991	Yes	10.5	118.54	36.51		42.86	2.64	12.66	10.341	0.16	10.46	10.22	2.62	1.76	0.69	3.3	98.86
CJ-2	Dostal et al., 1991	Yes	10.5	118.54	36.51		44.19	2.39	13	9.774	0.15	10.49	10.11	2.65	1.12	0.57	3.9	99.43
CJ-1	Dostal et al., 1991	Yes	10.5	118.54	36.51		43.4	2.7	12.99	9.855	0.16	10.55	10.54	3.4	0.82	0.67	3.2	99.38
CB-7	Dostal et al., 1991	Yes	10.5	118.54	36.51		43.59	2.61	12.59	10.413	0.17	12.46	9.63	3.13	0.83	0.55	2.8	99.93
CB-5	Dostal et al., 1991	Yes	10.5	118.54	36.51		43.41	2.52	12.64	10.44	0.16	11.06	9.88	2.6	0.93	0.58	3.7	99.08
CB-4	Dostal et al., 1991	Yes	10.5	118.54	36.51		42.74	2.68	12.61	10.35	0.15	11	9.67	3.89	0.9	0.72	3.6	99.46
CB-2	Dostal et al., 1991	Yes	10.5	118.54	36.51		42.59	2.7	12.79	10.386	0.17	10.25	9.61	3.36	2.48	0.8	3.6	99.89
CB-10	Dostal et al., 1991	Yes	10.5	118.54	36.51		43.46	2.58	12.94	10.134	0.16	10.3	10.3	3.72	0.68	0.67	3.1	99.17
CB-1	Dostal et al., 1991	Yes	10.5	118.54	36.51		42.77	2.63	12.78	10.377	0.16	9.48	9.57	3.11	2.53	0.81	3.5	98.87
18JF45	Feng et al., 2020	Yes	129	125.5	41.5	-3	55.5	1.42	14.1	7.083	0.05	2.77	3.15	3.31	2.12	0.25	6.49	97.1
18JF44	Feng et al., 2020	Yes	129	125.5	41.5	-0.5	52.9	0.74	14.9	3.798	0.11	2.17	8.17	4.28	2.24	0.18	9.77	99.7
18JF25	Feng et al., 2020	Yes	126.5	125.5	41.5	-7.3	64.3	0.69	16.5	3.501	0.15	0.34	0.99	5.07	5.94	0.19	2.66	100.7
18JF24	Feng et al., 2020	Yes	126	125.5	41.5	-7.5	64.9	0.69	17	3.474	0.14	0.14	0.32	4.62	6.56	0.18	1.54	100
18JF21	Feng et al., 2020	Yes	124	125.5	41.5	-6.9	62.4	0.74	16.2	3.789	0.06	0.8	3.11	3.78	4.46	0.28	4.06	100.1
18JF14	Feng et al., 2020	Yes	126.5	125.5	41.5	-5.9	52.8	1.96	17.8	8.55	0.1	2.85	4.34	5.55	2.61	0.58	2.26	100.3
18JF13	Feng et al., 2020	Yes	126.5	125.5	41.5	-5.5	51.5	1.97	17.7	8.64	0.07	3.16	3.47	5.09	3.29	0.59	3.4	99.8
18JF11	Feng et al., 2020	Yes	129	125.5	41.5	-4.5	62.7	0.69	15	4.356	0.1	1.39	3.12	6.15	3.06	0.21	2.7	100
18JF10	Feng et al., 2020	Yes	129	125.5	41.5	-4.8	66.2	0.69	15.6	4.356	0.05	1.35	0.95	6.92	2.34	0.21	1.26	100.4
FX2-90	Gao et al., 2008	Yes	119	118.04	35.04		48.29	1.09	11.5	8.082	0.11	14.26	8.82	2.44	1.97	0.66	1.38	99.5
FX2-89	Gao et al., 2008	Yes	119	118.04	35.04		48.41	1.09	11.49	7.965	0.11	13.91	8.88	1.75	2.94	0.66	1.45	99.54
FX2-88	Gao et al., 2008	Yes	119	118.04	35.04	-13.1	48.29	1.08	11.45	8.091	0.12	14.57	8.75	2.45	2.01	0.66	1.26	99.63
FX2-1	Gao et al., 2008	Yes	119	118.04	35.04		49.41	1.08	11.72	8.89056	0.15	12.9	8.97	2.59	2.08	0.67	0.75	100.198
SHT-51	Gao et al., 2008	Yes	125	120.78	41.6		49.9	0.86	13.19	7.542	0.12	10	8.04	2.62	2.56	0.82	3.1	99.59
SHT-50	Gao et al., 2008	Yes	125	120.78	41.6		49.94	0.85	13	7.731	0.11	10.24	8.03	2.64	2.42	0.8	3.35	99.97
SHT-49	Gao et al., 2008	Yes	125	120.78	41.6		49.895	0.855	13.09	7.5645	0.11	10.275	8.08	2.59	2.485	0.805	2.91	99.5
SHT-45	Gao et al., 2008	Yes	125	120.78	41.6		50.164	0.837	12.538	7.416	0.126	9.989	8.02	2.617	3.469	0.86	3.26613	100.126
SHT-44	Gao et al., 2008	Yes	125	120.78	41.6		50.169	0.817	12.106	7.4565	0.12	10.245	8.273	2.608	3.366	0.828	3.37972	100.197
SHT-43	Gao et al., 2008	Yes	125	120.78	41.6		49.86	0.85	12.6	7.74	0.12	10.76	8.33	2.56	2.38	0.76	3	99.82
SHT-42	Gao et al., 2008	Yes	125	120.78	41.6		49.89	0.85	13.12	7.5555	0.125	9.98	8.445	2.655	2.485	0.81	2.8	99.555
SHT-41	Gao et al., 2008	Yes	125	120.78	41.6		49.77	0.85	13.1	7.506	0.12	10.22	8.19	2.57	2.48	0.81	3.35	99.8
SHT-37	Gao et al., 2008	Yes	125	120.78	41.6		50.08	0.86	13.11	7.623	0.11	10.45	8.04	2.64	2.49	0.81	2.5	99.56
SHT-36	Gao et al., 2008	Yes	125	120.78	41.6	-2.23	49.77	0.88	12.55	7.803	0.12	10.77	8.47	2.48	2.39	0.76	3	99.86
SHT-35	Gao et al., 2008	Yes	125	120.78	41.6		49.89	0.86	13.16	7.605	0.11	10.47	8.01	2.6	2.49	0.8	2.71	99.55
SHT-34	Gao et al., 2008	Yes	125	120.78	41.6		50.11	0.85	13.33	7.506	0.11	9.73	8.25	2.69	2.5	0.82	2.77	99.5
SHT-33	Gao et al., 2008	Yes	125	120.78	41.6		51.53	0.81	13.39	7.173	0.11	9.72	7.53	2.72	2.56	0.74	2.51	99.59
SHT-32	Gao et al., 2008	Yes	125	120.78	41.6		50.12	0.87	13.34	7.524	0.11	9.63	8.38	2.61	2.54	0.83	2.75	99.54
SHT-31	Gao et al., 2008	Yes	125	120.78	41.6	-2.16	50.52	0.87	12.85	7.524	0.12	11.51	7.32	3.01	2.35	0.67	2.14	99.72
SHT-30	Gao et al., 2008	Yes	125	120.78	41.6		50.19	0.85	13.21	7.614	0.12	10.22	7.96	2.65	2.55	0.81	2.49	99.51
SHT-28	Gao et al., 2008	Yes	125	120.78	41.6	-1.58	50.19	0.83	12.78	7.677	0.11	10.86	8.14	2.58	2.39	0.77	2.33	99.51
SHT-27	Gao et al., 2008	Yes	125	120.78	41.6		50.18	0.85	13.25	7.605	0.11	10.05	8.19	2.65	2.47	0.81	2.51	99.52
SHT-25	Gao et al., 2008	Yes	125	120.78	41.6		49.505	0.845	12.73	7.6725	0.11	10.205	8.19	2.565	2.395	0.78	3.85	99.7
SHT-24	Gao et al., 2008	Yes	125	120.78	41.6		50.234	0.821	11.979	7.4754	0.126	11.86	7.181	2.682	3.12	0.726	2.64969	99.6847
SHT-21	Gao et al., 2008	Yes	125	120.78	41.6	-1.73	49.41	0.84	12.67	7.632	0.12	11.05	8.08	2.48	2.35	0.77	3.25	99.5
SHT-20	Gao et al., 2008	Yes	125	120.78	41.6		49.91	0.86	13.12	7.551	0.12	10.2	8.25	2.63	2.43	0.8	2.97	99.68
SHT-19	Gao et al., 2008	Yes	125	120.78	41.6	-2.44	49.81	0.84	12.99	7.677	0.11	11.03	7.83	2.52	2.44	0.8	2.68	99.58
SHT-17	Gao et al., 2008	Yes	125	120.78	41.6		49.83	0.86	13.21	7.596	0.11	10.4	7.85	2.56	2.44	0.81	3.03	99.54
SHT-16	Gao et al., 2008	Yes	125	120.78	41.6	-2.1	49.9	0.86	12.6	7.56	0.12	12.29	7.3	2.69	2.3	0.67	2.39	99.52
SHT-15	Gao et al., 2008	Yes	125	120.78	41.6		50.025	0.85	13.075	7.6365	0.12	10.405	7.91	2.65	2.565	0.805	2.67	99.56
98ZP-10	Guo et al., 2001	Yes	115	117.85	36.6	-14.9	50.74	0.77	11.81	9.612	0.16	12.44	8.78	2.6	1.49	0.34	0.8	99.65
97JY-5	Guo et al., 2001	Yes	115	117.85	36.6	-9.2	48.4	0.77	12.7	11.839	0.2	11.64	10.38	1.54	0.76	0.11	0.75	99.3
97JY-1	Guo et al., 2001	Yes	115	117.85	36.6		51.18	0.7	13.27	10.346	0.21	14.85	8.31	1.55	0.34	0.13	0.78	101.86
97JW-1	Guo et al., 2001	Yes	115	117.85	36.6		49.72	0.71	13.27	9.73	0.18	11.41	10.71	1.79	0.82	0.13	0.52	99.24
97JL-1	Guo et al., 2001	Yes	115	117.85	36.6		51.52	0.68	14.43	9.051	0.17	10.65	10.32	2.01	0.7	0.19	0.62	99.84
97JK-8	Guo et al., 2001	Yes	115	117.85	36.6	-18.7	48.44	0.7	8.13	14.426	0.27	15.56	10.25	0.99	0.44	0.12	0.88	100.34
97JK-7	Guo et al., 2001	Yes	115	117.85	36.6	-21.2	50.6	0.52	13.7	10.575	0.19	11.12	9.8	1.63	0.58	0.1	0.62	99.67
97JK-3	Guo et al., 2001	Yes	115	117.85	36.6	-9.5	51.12	0.47	15.55	9.311	0.17	9.62	10.77	1.85	0.49	0.09	0.69	100.29
97JH-6	Guo et al., 2001	Yes	115	117.85	36.6	-12.9	53.1	0.79	15.41	8.588	0.15	8.15	8.83	2.71	1.48	0.21	0.78	100.39
97JH-5	Guo et al., 2001	Yes	115	117.85	36.6		51.1	0.57	14.41	9.081	0.16	10.51	10.25	1.96	1.03	0.14	0.72	100.14
97JH-2	Guo et al., 2001	Yes	115	117.85	36.6	-9.7	51.52	0.76	10.56	9.625	0.19	11.78	11.03	1.53	1.17	0.13	0.93	99.37
97JF-2	Guo et al., 2001	Yes	115	117.85	36.6		50.06	0.49	15.84	9.426	0.17	8.39	10.63	1.99	0.69	0.14	0.45	98.57
97JB-1	Guo et al., 2001	Yes	115	117.85	36.6		47.74	0.66	7.71	12.662	0.24	17.35	9.51	1.05	0.34	0.09	0.99	99.06
97RY-6	Guo et al., 2004	No	127	121.58	37.38		53.42	0.85	15.13	6.279	0.16	7.68	7.01	2.87	2.58	0.38	3.11	99.56
97RY-4	Guo et al., 2004	No	127	121.58	37.38		50.28	0.97	14.84	7.093	0.14	7.02	8.05	2.63	2.57	0.47	4.18	98.48
97RY-25	Guo et al., 2004	No	127	121.58	37.38		49.94	0.99	13.98	7.247	0.13	9.14	8.44	2.13	2.07	0.29	5.47	100.06
97RY-24	Guo et al., 2004	No	127	121.58	37.38		51.36	0.88	14.98	7.111	0.12	7.4	7.79	2.31	2.39	0.32	5.03	99.92
97RY-2	Guo et al., 2004	No	126	121.58	37.38		53	0.89	16.55	6.597	0.12	5.89	8.44	3.4	2.27	0.4	2.61	100.37
97RS-9	Guo et al., 2004	No	126.7	121.5	36.92		53.78	1.08	18.62	5.872	0.14	3.11	7.01	4.16	3.95	0.6	1.4	99.97
97RS-7	Guo et al., 2004	No	127	121.5	36.92		47.94	1.05	15.83	7.168	0.13	8.92	8.05	3.09	2.11	0.52	3.9	98.85
97RS-3	Guo et al., 2004	No	127	121.5	36.92		55.4	1.05	17.33	5.634	0.12	3.72	4.98	4.2	4.02	0.83	2.58	100.07
97RS-27	Guo et al., 2004	No	127	121.5	36.92		44.66	1.28	13.41	6.597	0.18	10.51	11.89	2.16	2.17	0.9	4.62	100.21
97RS-26	Guo et al., 2004	No	127	121.5	36.92		48.64	1.16	16.41	7.174	0.13	7.16	9.47	3.23	1.95	0.54	4.1	100.11
97RS-24	Guo et al., 2004	No	127	121.5	36.92		55	0.98	17.55	5.39	0.1	3.49	6.49	4.34	3.48	0.59	2.76	100.26
97RS-21	Guo et al., 2004	No	127	121.5	36.92		50.76	1.19	17.84	7.093	0.14	3.77	6.75	4.03	4.6	1.16	2.72	100.33
97RS-19	Guo et al., 2004	No	127	121.5	36.92		46.8	1.28	15.13	8.445	0.15	8.48	10.64	2.93	2.57	0.62	2.9	100.27
97LW-7	Guo et al., 2005	Yes	105.1	121	36.17	-16.8	48.74	1.11	17.41	7.353	0.09	4.49	8.96	3.26	1.94	0.4	5.32	99.5
97LW-6	Guo et al., 2005	Yes	105.1	121	36.17		55.96	0.78	15.41	5.542	0.09	4.29	8.44	2.96	2.49	0.3	3.4	99.9
97LW-39	Guo et al., 2005	Yes	106.5	121	36.17	-16.4	52.36	0.95	15.34	6.253	0.06	3.39	8.26	3.05	2.35	0.43	6.65	99.36
97LW-37	Guo et al., 2005	Yes	106.5	121	36.17		47.22	1.23	17.34	7.303	0.13	5.7	9.97	2.86	1.68	0.46	5.35	99.56
97LW-34	Guo et al., 2005	Yes	106.5	121	36.17	-16.7	50.92	1.14	16.62	6.263	0.1	3.49	8.26	3.18	2.49	0.45	6.25	99.2
97LW-33	Guo et al., 2005	Yes	106.5	121	36.17		50.84	1.06	16.2	6.448	0.12	2.64	9.38	3.11	2.4	0.44	6.56	99.6
97LW-31	Guo et al., 2005	Yes	106.5	121	36.17	-16	48.58	1.01	15.98	6.507	0.08	6.55	6.67	3	2.23	0.49	8.1	99.4
97LW-3	Guo et al., 2005	Yes	105.1	121	36.17	-16.5	50.7	1.01	17.27	6.65	0.08	4.62	7.66	3.49	2.11	0.48	4.81	99.29
97LW-29	Guo et al., 2005	Yes	106.5	121	36.17		52.64	1.17	16.41	5.394	0.09	2.45	7.2	3.77	2.87	0.59	6.43	99.36
97LW-28	Guo et al., 2005	Yes	106.5	121	36.17	-17.7	51.64	1.18	16.2	6.018	0.09	3.58	7.46	3.72	2.2	0.6	6.82	99.81
97LW-27	Guo et al., 2005	Yes	106.5	121	36.17	-15.6	54.12	1.17	19.26	6.262	0.12	5.28	6.21	3.29	2	0.42	1.94	100.09
97LW-24	Guo et al., 2005	Yes	106.5	121	36.17		57.5	1.13	17.05	5.002	0.08	3.02	5.3	3.46	2.18	0.4	3.87	99.29
97LW-21	Guo et al., 2005	Yes	106.5	121	36.17		54.5	0.89	17.27	5.856	0.07	4.43	3.76	4.14	2.84	0.44	4.89	99.34
97LW-20	Guo et al., 2005	Yes	106.5	121	36.17	-16.9	55.04	1.12	15.55	6.838	0.09	4.15	5.58	3.33	2.5	0.51	4.63	99.78
97LW-17	Guo et al., 2005	Yes	106.5	121	36.17	-16.6	54.44	1.11	17.77	6.915	0.07	4.43	6.23	3.25	2.58	0.46	2.32	99.85
97LW-16	Guo et al., 2005	Yes	105.1	121	36.17	-17.9	54.18	1.1	15.98	6.355	0.09	4.16	5.58	3.88	3.57	0.41	3.62	99.34
97LW-1	Guo et al., 2005	Yes	105.1	121	36.17		48.8	0.99	16.41	5.844	0.11	4.34	12.27	3.36	2.1	0.39	4.95	99.78
09SD-185	Guo et al., 2013	Yes	124.9	117.98	35.27	-14	47.36	1.13	12.68	8.019	0.14	11.7	9.33	2.64	0.95	0.8	4.04	99.68
09SD-183	Guo et al., 2013	Yes	124.9	117.98	35.27	-14.1	47.87	1.13	12.89	7.974	0.13	11.2	9.25	2.83	1.03	0.79	3.7	99.68
09SD181-1	Guo et al., 2013	Yes	124.9	117.98	35.27	-14	45.18	1.05	11.98	7.398	0.13	11.36	11.89	2.48	0.87	0.73	5.94	99.85
09SD-178	Guo et al., 2013	Yes	124.9	117.98	35.27	-13.2	49.28	1.15	14.47	7.83	0.12	7.9	8.51	3.36	1.65	0.96	3.55	99.64
09SD-177	Guo et al., 2013	Yes	124.9	117.98	35.27	-14.1	47.49	1.13	12.51	8.037	0.13	11.92	9.41	2.61	0.96	0.77	3.81	99.67
09SD-172	Guo et al., 2013	Yes	124.9	117.98	35.27	-13.8	48.02	1.12	12.25	7.668	0.12	11.19	10.43	2.56	0.9	0.74	3.81	99.67
09SD-171	Guo et al., 2013	Yes	124.9	117.98	35.27	-13.8	48.3	1.13	12.17	7.911	0.13	11.91	10.13	2.72	0.85	0.74	2.71	99.58
09SD-170	Guo et al., 2013	Yes	124.9	117.98	35.27	-11.1	47.59	1.14	12.65	8.028	0.13	11.71	9.27	2.81	1.01	0.78	3.66	99.66
09SD-169	Guo et al., 2013	Yes	124.9	117.98	35.27	-12.2	49.38	1.13	14.34	7.902	0.13	8.8	8.54	2.92	1.68	0.95	2.97	99.62
09SD-167	Guo et al., 2013	Yes	124.9	117.98	35.27	-13	49.57	1.12	14.46	7.947	0.13	8.94	8.37	2.37	2.79	0.93	2.06	99.58
09SD-165	Guo et al., 2013	Yes	124.9	117.98	35.27	-13	49.57	1.13	14.5	7.893	0.13	8.73	8.36	2.4	2.86	0.96	2.16	99.57
YYG-18	Guo et al., 2014	Yes	23.45	112.86	40.83		47.3	2.5	13.8	10.8	0.15	7.64	7.3	4.45	1.36	1.01	1.91	98.22
YYG-17	Guo et al., 2014	Yes	23.45	112.86	40.83	4.11	45.8	2.08	14.5	11.79	0.17	7.29	7.87	4.12	2.35	0.58	1.49	98.04
YYG-16	Guo et al., 2014	Yes	23.45	112.86	40.83		48	1.85	14.8	10.8	0.16	5.58	6.83	4.97	2.68	0.84	1.73	98.24
YYG-11	Guo et al., 2014	Yes	23.45	112.86	40.83		48.7	1.7	14.2	10.26	0.16	6.47	7.26	4.78	2.14	0.73	1.9	98.3
YYG-10	Guo et al., 2014	Yes	23.45	112.86	40.83		47.7	1.87	15.1	10.8	0.16	5.53	6.79	4.85	2.78	0.88	1.66	98.12
YYG-08	Guo et al., 2014	Yes	23.45	112.86	40.83		47.6	1.92	14.9	10.98	0.16	6.18	7.24	4.24	2.46	0.75	1.75	98.18
YYG-03	Guo et al., 2014	Yes	23.45	112.86	40.83	4.97	48.8	1.8	14.9	10.53	0.15	5.18	6.51	5.08	2.9	0.84	1.55	98.24
YYG-01	Guo et al., 2014	Yes	23.45	112.86	40.83		48.9	1.8	14.6	10.53	0.15	5.38	6.7	4.9	2.79	0.84	1.68	98.27
WYF-19	Guo et al., 2014	Yes	114.1	112.02	41.98	-3.99	51.7	2.44	14.9	9.45	0.14	5.23	6.21	4.07	2.47	0.6	1.13	98.34
WYF-10	Guo et al., 2014	Yes	114.1	112.02	41.98	-3.96	49.9	2.47	15.1	9.45	0.14	5.3	6.93	3.49	2.59	0.64	2.09	98.1
WYF-09	Guo et al., 2014	Yes	114.1	112.02	41.98	-4.28	51.2	2.47	14.8	9.54	0.14	5.48	6.48	3.79	2.48	0.59	1.23	98.2
WYF-07	Guo et al., 2014	Yes	114.1	112.02	41.98	-4.36	49.9	2.56	15.1	9.72	0.15	5.64	6.75	3.87	2.65	0.61	1.31	98.26
WYF-05	Guo et al., 2014	Yes	114.1	112.02	41.98	-4.22	49.4	2.6	15.4	9.9	0.15	5.63	6.71	3.94	2.58	0.63	1.29	98.23
DB-07	Guo et al., 2014	Yes	21.9	111.71	41.37	4.9	47.8	2.64	13.7	11.61	0.16	6.1	6.97	4.46	1.41	1.01	1.96	97.82
DB-03	Guo et al., 2014	Yes	21.9	111.71	41.37	6.52	44.3	2.35	13.5	11.34	0.17	7.88	7.73	5.61	2.12	1.44	1.71	98.15
DB-02	Guo et al., 2014	Yes	21.9	111.71	41.37	6.23	43.3	2.39	13.7	11.61	0.17	8.28	7.79	5.72	2.21	1.47	1.49	98.13
DB-01	Guo et al., 2014	Yes	21.9	111.71	41.37	6.41	43.5	2.36	14	11.16	0.16	7.66	7.68	6.2	1.97	1.42	1.85	97.96
BY I-03	Guo et al., 2014	Yes	21.9	111.71	41.37		48.3	2.23	14.4	10.62	0.16	7.16	8.5	4.02	1.04	0.56	1.25	98.24
DMPII-08	Guo et al., 2016	Yes	18.255	114.53	40.98		44.2535	2.52768	13.6722	11.8513	0.163804	8.96016	9.32799	2.87588	2.39526	0.829808	1.58191	98.4395
DMPII-06	Guo et al., 2016	Yes	18.255	114.53	40.98	5.13	48.9985	1.87679	14.3418	10.229	0.147504	7.91281	8.3951	2.75211	1.13539	0.387198	2.4868	98.663
DMPII-03	Guo et al., 2016	Yes	18.255	114.53	40.98	2.44	43.9194	2.37725	12.8041	12.348	0.177902	10.7709	9.46598	2.32642	1.19938	0.631456	2.38692	98.4077
DMPI-03	Guo et al., 2016	Yes	18.255	114.53	40.98	6.99	43.2508	2.7816	12.9387	12.4953	0.161224	9.13829	8.94016	2.87678	1.75501	0.827487	3.2662	98.4316
LC-01	Guo et al., 2016	Yes	18.255	112.84	40.57		50.7617	1.95783	13.4853	10.499	0.130261	6.89326	7.47621	3.27239	1.59846	0.458895	1.675	98.2083
LC-02	Guo et al., 2016	Yes	18.255	112.84	40.57	-3.41	49.8407	2.01981	15.2816	10.6949	0.154161	5.2135	8.128	3.77813	1.7072	0.422306	0.904	98.1443
DLH-01	Guo et al., 2016	Yes	18.255	113.28	41.22	1.5	48.2289	2.06439	15.4184	9.7261	0.150009	5.73344	9.51874	3.14315	2.10617	0.537254	1.663	98.2896
NQS-01	Guo et al., 2016	Yes	18.255	113.28	40.66		46.0864	2.76952	11.6945	11.6199	0.169821	8.44278	8.51679	4.82843	1.07965	1.14692	1.793	98.1477
NQS-04	Guo et al., 2016	Yes	18.255	113.28	40.66		44.0976	2.75996	12.5564	11.7966	0.172432	9.46801	8.79547	3.80224	2.30014	1.16437	1.256	98.1693
NQS-07	Guo et al., 2016	Yes	18.255	113.28	40.66	3.05	44.3913	2.76185	14.3333	12.5513	0.173413	8.65813	8.54083	2.54641	1.84154	0.637224	1.611	98.0464
NQS-16	Guo et al., 2016	Yes	18.255	113.28	40.66	2.9	40.0785	2.97771	13.6972	12.7648	0.17953	10.1191	9.25014	3.72441	2.96483	1.16206	1.181	98.0993
NQS-20	Guo et al., 2016	Yes	18.255	113.28	40.66		40.6946	2.95645	13.5921	12.5102	0.175586	9.83937	9.18257	3.51222	3.05497	1.14203	1.461	98.1211
SH-01	Guo et al., 2016	Yes	18.255	113.24	40.52	0.96	48.5187	2.0462	14.7561	12.6569	0.166158	6.99445	8.54208	3.25702	0.517892	0.248238	0.246	97.9497
SH-02	Guo et al., 2016	Yes	18.255	113.24	40.52		49.9328	2.02106	14.1294	12.2385	0.163862	6.76977	8.44518	2.97916	0.286491	0.226424	0.794	97.9867
XLM-07	Guo et al., 2016	Yes	18.255	118.14	43.24	4.74019	49.1258	2.09372	11.9883	11.2287	0.157421	8.89497	8.23033	2.34713	1.24189	0.426749	2.452	98.187
XLM-17	Guo et al., 2016	Yes	18.255	118.14	43.24	3.58928	47.8488	2.1552	12.9697	10.8623	0.179208	7.94886	9.61062	3.29384	1.27505	0.421238	1.652	98.2167
DMB-01	Guo et al., 2016	Yes	18.255	118.26	42.41	2.38765	48.932	2.1001	13.4493	11.8104	0.155616	6.40385	7.73722	3.34181	1.15586	0.420331	2.547	98.0535
DMB-06	Guo et al., 2016	Yes	18.255	118.26	42.41	2.18478	47.3999	2.17651	14.3964	12.0246	0.173	7.52196	8.82445	3.70408	1.22347	0.4332	0.178	98.0555
DMB-09	Guo et al., 2016	Yes	18.255	118.26	42.41	3.34154	48.0082	2.32438	12.4069	11.466	0.164137	8.79174	8.20741	2.92676	1.48995	0.552374	1.825	98.1629
DMB-12	Guo et al., 2016	Yes	18.255	118.26	42.41	3.51125	49.7262	2.04727	11.3992	11.1393	0.152517	9.60979	7.6806	2.54593	0.950192	0.388225	2.058	97.6972
DMB-15	Guo et al., 2016	Yes	18.255	118.26	42.41	2.32133	48.2602	2.23413	12.6449	11.0762	0.158653	8.60546	8.36082	2.75194	1.65279	0.523607	1.688	97.9568
DMB-35	Guo et al., 2016	Yes	18.255	118.26	42.41	4.75033	45.4915	3.11888	11.6776	12.5426	0.174039	9.23895	9.15095	2.68563	1.69702	0.887705	1.403	98.068
DMN-03	Guo et al., 2016	Yes	18.255	118.5	42.4	3.21865	49.7332	2.38026	13.7936	11.0542	0.161996	6.61687	8.1193	3.57886	1.46992	0.426461	0.807	98.1416
DMN-05	Guo et al., 2016	Yes	18.255	118.5	42.4	4.19984	49.9328	2.3426	13.5882	11.5295	0.161532	6.47384	7.51897	3.5556	1.48942	0.469574	0.762	97.824
DMN-07	Guo et al., 2016	Yes	18.255	118.5	42.4	4.39686	49.4206	2.22928	11.8646	11.9031	0.16735	9.35627	7.89952	3.18544	1.31646	0.405406	0.365	98.113
DMN-08	Guo et al., 2016	Yes	18.255	118.5	42.4	3.33569	49.4965	1.97276	12.2204	11.5257	0.162418	9.55002	7.63471	3.10985	1.20058	0.360412	0.925	98.1584
SM-03	Guo et al., 2016	Yes	18.255	118.7	42.34	4.16255	36.6634	2.91925	16.889	14.461	0.201629	9.15798	10.394	4.4392	1.74146	0.533012	0.476	97.8759
SM-06	Guo et al., 2016	Yes	18.255	118.7	42.34	4.07695	46.6381	2.42245	13.6463	12.409	0.174344	8.68519	8.32838	3.57805	1.41067	0.418273	0.338	98.0487
SM-09	Guo et al., 2016	Yes	18.255	118.7	42.34	2.18868	48.3789	2.10991	13.7212	11.2772	0.168143	8.15764	8.09218	3.75299	1.6083	0.449349	0.444	98.1598
YJQD-10	Guo et al., 2016	Yes	18.255	118.68	42.34	1.38499	51.8842	1.89924	13.7624	10.1574	0.145512	7.45558	7.90831	3.1873	1.17386	0.363869	0.307	98.2447
HQ14-17	Guo et al., 2018	Yes	107.3	107.54	41.52	-12.14	57.7	1.74	16.35	7.242	0.12	2.58	4.97	4.04	3	0.86	1.398	100
HQ14-12	Guo et al., 2018	Yes	107.3	107.54	41.52	-11.8	56.9	1.83	16.5	7.618	0.12	2.56	5.53	3.66	3.59	0.82	0.872	100
HQ14-08	Guo et al., 2018	Yes	107.3	107.54	41.52	-9.27	52.9	1.91	17.3	7.939	0.1	4.08	5.56	3.96	3.33	0.85	2.071	100
HQ14-05	Guo et al., 2018	Yes	107.3	107.54	41.52	-9.97	59.8	1.57	14.9	7.31	0.08	1.84	3.89	3.89	4.58	0.72	1.42	100
HQ14-04	Guo et al., 2018	Yes	107.3	107.54	41.52	-8.96	51.8	2.25	18.5	9.091	0.09	2.6	4.59	3.92	3.9	0.85	2.409	100
HQ14-01	Guo et al., 2018	Yes	107.3	107.54	41.52	-9.74	53.2	2.28	15.05	11.066	0.12	3.98	6.46	3.62	2.36	0.73	1.134	100
GY14-39	Guo et al., 2018	Yes	133.13	109.65	41.19	-9.07	49.9	2.33	14.7	11.414	0.15	3.05	6.3	3.68	2.06	0.62	5.796	100
GY14-27	Guo et al., 2018	Yes	133.13	109.65	41.19	-11.37	49.07	2.84	16.12	12.933	0.15	3.76	6.82	4.13	2.01	1.03	1.137	100
GY14-17	Guo et al., 2018	Yes	133.13	109.65	41.19	-4.82	47.16	2.82	17.38	13.237	0.16	4.93	7.42	3.77	1.61	0.73	0.783	100
GY14-15	Guo et al., 2018	Yes	133.13	109.65	41.19	-10.22	48.07	3.27	15.36	14.365	0.2	3.29	7.72	3.8	1.96	1.1	0.865	100
98WC-20	Guo et al., 2022	Yes	120	117.8	40.96	-8.5	49.41	1.85	18.66	7.995	0.14	2.3	7.2	3.29	2.47	1.5	2.5	99.62
98WC-19	Guo et al., 2022	Yes	120	117.8	40.96	-8.7	51.97	2	17.01	8.647	0.09	3.1	5.6	3.55	2.46	1.47	2.7	99.37
98WC-16	Guo et al., 2022	Yes	120	117.8	40.96		51.76	1.85	19.73	8.008	0.13	2.5	6	4.08	1.49	1.33	2.18	99.85
98WC-15	Guo et al., 2022	Yes	120	117.8	40.96	-7.2	52.57	2	16.53	8.941	0.14	3.2	6.2	3.75	1.53	1.5	2.38	99.8
98LP-8	Guo et al., 2022	Yes	180	117.33	40.94	-13.4	52.98	0.7	19.37	7.487	0.08	2.4	4.5	5.07	1.08	0.6	3.98	99.31
98LP-4	Guo et al., 2022	Yes	180	117.33	40.94	-15.1	54.07	1.15	18.02	7.255	0.11	3.8	7.1	3.1	0.67	0.77	3.1	99.89
98LP-27	Guo et al., 2022	Yes	150	117.33	40.94	-14.9	56.03	1.05	18.02	6.694	0.13	2.5	4.9	4.15	2.48	0.86	2.1	99.52
98LP-26	Guo et al., 2022	Yes	150	117.33	40.94	-14.4	55.12	1	19.06	6.309	0.09	2.3	4.6	4.66	2.22	0.93	2.7	99.58
98LP-24	Guo et al., 2022	Yes	150	117.33	40.94	-14.6	53.27	1.15	19.13	7.319	0.09	2.7	4.8	4.38	2.44	0.7	3	99.56
98LP-2	Guo et al., 2022	Yes	180	117.33	40.94	-12.9	53.52	1	18.9	6.839	0.12	3.1	4.8	4.23	1.11	0.6	4.7	99.4
98LP-12	Guo et al., 2022	Yes	180	117.33	40.94		52.33	0.72	19.13	6.228	0.11	3.4	4.75	5.43	1.11	0.64	5	99.82
98FN-20	Guo et al., 2022	Yes	120	116.65	41.2	-9.3	54	1.37	17.71	8.602	0.15	2.4	5.1	3.92	2.73	1.27	1.7	99.65
98FN-18	Guo et al., 2022	Yes	120	116.65	41.2		53.54	1.38	18.1	7.81	0.14	2.5	4.9	4.14	2.31	0.97	3.07	99.75
98FN-14	Guo et al., 2022	Yes	120	116.65	41.2		50.87	2.2	17.48	9.659	0.14	3.2	5.8	3.57	2.26	1.37	1.9	99.29
20XSH-88	Guo et al., 2022	Yes	150	116.23	40.22	-13.5	56.99	1.03	15.41	6.826	0.08	3.9	5.81	4.16	1.73	0.33	2.83	99.64
20XSH-85	Guo et al., 2022	Yes	150	116.23	40.22	-14.1	57.43	0.88	15.34	6.424	0.07	3.6	6.22	3.26	2.63	0.32	3.17	99.63
20XSH-77	Guo et al., 2022	Yes	150	116.23	40.22	-14.5	56.97	1.1	16.77	6.375	0.09	3.51	4.04	5.58	1.5	0.48	2.67	99.63
20XSH-76	Guo et al., 2022	Yes	150	116.23	40.22		52.28	1.13	17.61	6.391	0.13	3.23	7.65	4.48	1.69	0.5	3.95	99.61
20XSH-68	Guo et al., 2022	Yes	150	116.23	40.22		51.25	1.02	19.96	8.242	0.1	3.29	5.55	4.2	2	0.44	3.17	99.59
20XSH-62	Guo et al., 2022	Yes	180	116.23	40.22		51.68	1.18	17.28	7.82	0.12	4.33	8.22	2.74	2.69	0.34	2.87	99.62
20XSH-59	Guo et al., 2022	Yes	180	116.23	40.22	-13.6	52.41	1.24	16.84	7.773	0.08	5.75	2.73	4.29	2.6	0.49	5.09	99.66
20XSH-58	Guo et al., 2022	Yes	180	116.23	40.22	-12.1	53.99	1.04	16.26	7.12	0.13	4.18	4.33	4.54	2.86	0.38	4.38	99.56
20XSH-57	Guo et al., 2022	Yes	180	116.23	40.22	-12.4	55.73	0.96	15.75	6.966	0.06	3.96	4.09	5.52	1.91	0.37	4.01	99.67
20XSH-52	Guo et al., 2022	Yes	180	116.23	40.22		54.06	1.1	17.52	6.909	0.09	4.63	3.31	6.05	1.69	0.36	3.54	99.66
20XSH-44	Guo et al., 2022	Yes	180	116.23	40.22		47.64	2.03	16.98	10.414	0.16	5.17	6.28	4.12	1.51	0.81	4.13	99.64
20XSH-43	Guo et al., 2022	Yes	180	116.23	40.22		48.4	2.14	16.48	11.541	0.16	4.71	5.11	4.14	1.57	0.81	3.92	99.63
20XSH-42	Guo et al., 2022	Yes	180	116.23	40.22		48.33	2.08	17.61	10.409	0.16	3.51	6.36	3.47	2.75	0.77	3.35	99.57
20XSH-41	Guo et al., 2022	Yes	180	116.23	40.22	-7.6	49.24	2.11	15.37	9.692	0.16	6.44	6.44	3.82	1.47	0.81	3.88	99.62
20XSH-40	Guo et al., 2022	Yes	180	116.23	40.22	-7.5	49.24	1.92	15.58	9.929	0.15	5.62	7.73	3.11	1.63	0.76	3.64	99.61
20XSH-33	Guo et al., 2022	Yes	120	116.23	40.22		53.47	1.6	15.73	7.699	0.07	2.8	6.59	3.22	4.32	0.98	2.23	99.35
20XSH-32	Guo et al., 2022	Yes	120	116.23	40.22	-13.5	54.55	1.6	15.66	7.22	0.06	2.91	5.75	3.34	4.7	0.99	1.9	99.29
20XSH-31	Guo et al., 2022	Yes	120	116.23	40.22	-12.7	48.36	1.99	15.79	8.252	0.19	5.72	8.3	2.38	3.83	1.04	2.95	99.25
20XSH-30	Guo et al., 2022	Yes	120	116.23	40.22	-14.8	53.72	1.54	15.45	7.072	0.11	3.57	7.19	3.38	3.4	0.93	2.55	99.44
20XSH-29	Guo et al., 2022	Yes	120	116.23	40.22	-12.5	49.59	1.86	15.94	8.497	0.17	5.37	7.56	2.33	3.72	1.02	2.81	99.33
20XSH-133	Guo et al., 2022	Yes	150	116.23	40.22		51.39	1.68	15.01	9.325	0.13	4.06	6.15	3.98	3.13	0.91	2.94	99.53
20XSH-132	Guo et al., 2022	Yes	150	116.23	40.22	-14.1	51.88	1.87	15.35	9.056	0.11	3	6.57	4.22	2.97	0.96	2.75	99.55
20XSH-130	Guo et al., 2022	Yes	150	116.23	40.22		50.91	1.9	15.5	9.48	0.1	3.79	6.79	3.63	2.74	0.99	2.78	99.5
20XSH-125	Guo et al., 2022	Yes	150	116.23	40.22	-12.5	49.75	1.76	17.19	10.047	0.15	3.42	5.9	4.58	2.6	0.82	2.38	99.51
20XSH-123	Guo et al., 2022	Yes	150	116.23	40.22	-11.8	49.36	1.8	17.27	8.928	0.18	4.45	6.44	3.86	2.95	0.84	2.8	99.5
20XSH-122	Guo et al., 2022	Yes	150	116.23	40.22	-11.8	49.34	1.79	17.34	9.931	0.18	3.04	6.54	4.31	2.7	0.82	2.53	99.43
IM34	Ho et al., 2011	Yes	35.2	113.42	41.03		52.95	1.71	14.59	10.35	0.14	6.53	8.47	3.07	0.98	0.25	0.48	99.52
IM33	Ho et al., 2011	Yes	35.2	113.42	41.03		51.05	1.81	15.06	10.61	0.13	6.54	8.85	3.09	1.08	0.27	1.76	100.25
IM32	Ho et al., 2011	Yes	20.4	113.42	41.03		44.24	2.74	14.73	11.46	0.16	8.94	8.69	2.99	1.94	0.7	3.16	99.75
IM31B	Ho et al., 2011	Yes	22	113.42	41.03		44.06	2.62	15.61	11.13	0.18	9.59	9.5	4.02	1.18	0.82	2.18	100.89
IM31A	Ho et al., 2011	Yes	1.3	113.42	41.03		51.59	1.7	14.99	10.57	0.14	6.85	8.57	3.02	1.1	0.26	0.76	99.55
IM30	Ho et al., 2011	Yes	1.3	113.42	41.03		47.15	2.83	17.43	10.66	0.15	4.22	8.14	5.56	3.22	1.01	0.02	100.39
IM29	Ho et al., 2011	Yes	0.11	113.42	41.03		48.69	2.87	17.23	11.14	0.16	4.29	8.12	4.96	2.74	0.73	0	100.93
IM28	Ho et al., 2011	Yes	33.6	113.42	41.03		51.53	1.71	15.42	11.02	0.15	6.23	9.24	3.18	0.92	0.26	1.29	100.95
IM27	Ho et al., 2011	Yes	33.6	113.42	41.03		52.19	1.75	15.16	9.62	0.13	6.66	8.58	3.25	1.27	0.32	0.68	99.61
IM26	Ho et al., 2011	Yes	33.6	113.42	41.03		51.81	1.74	14.57	9.33	0.12	6.75	8.59	3.07	0.98	0.31	2.3	99.57
IM25	Ho et al., 2011	Yes	33.6	113.42	41.03		52.06	1.79	14.51	9.79	0.13	6.82	8.1	3.19	1.17	0.29	1.51	99.36
IM24	Ho et al., 2011	Yes	33.6	113.42	41.03		52.84	1.61	15.09	10.02	0.14	6.01	8.95	3.05	0.92	0.24	0.99	99.86
IM23	Ho et al., 2011	Yes	33.6	113.42	41.03		52.37	1.56	14.76	10.18	0.14	5.77	8.9	3.01	0.86	0.24	1.36	99.15
IM22	Ho et al., 2011	Yes	33.6	113.42	41.03		53.83	1.58	14.67	9.72	0.12	5.48	8.69	2.99	0.89	0.22	1.33	99.52
IM21	Ho et al., 2011	Yes	33.6	113.42	41.03		52.48	1.59	14.66	10.02	0.14	6.15	8.76	3.03	0.79	0.24	1.49	99.35
IM20	Ho et al., 2011	Yes	33.6	113.42	41.03		53.54	1.61	14.86	9.86	0.13	6.08	8.47	3.05	0.83	0.23	1	99.66
IM19	Ho et al., 2011	Yes	31.5	113.42	41.03		49.95	2.19	14.58	9.31	0.12	4.91	8.97	3.46	2.46	0.6	2.67	99.22
IM18	Ho et al., 2011	Yes	36.4	113.42	41.03		52.66	1.67	15.51	9.58	0.13	6.39	8.57	3.18	1.1	0.31	0.67	99.77
IM17	Ho et al., 2011	Yes	33.1	113.42	41.03		52.36	1.67	14.76	9.34	0.11	6.69	8.32	3.06	0.97	0.3	2.03	99.61
IM16	Ho et al., 2011	Yes	33.1	113.42	41.03		52.78	1.74	14.56	9.81	0.13	6.56	8.25	3.1	1.22	0.29	1.45	99.89
IM15	Ho et al., 2011	Yes	34.8	113.42	41.03		52.68	1.59	14.8	9.66	0.11	6.3	8.39	3.03	0.94	0.23	2.08	99.81
IM14	Ho et al., 2011	Yes	34.8	113.42	41.03		53.04	1.57	14.85	9.8	0.14	6.1	8.52	2.93	1	0.23	0.99	99.17
IM13	Ho et al., 2011	Yes	23.1	113.42	41.03		51.44	1.86	14.59	10.51	0.14	6.4	8.6	3.18	0.93	0.32	1.18	99.15
IM12	Ho et al., 2011	Yes	23.1	113.42	41.03		50.69	1.89	14.67	10.66	0.14	6.9	8.83	3.18	0.94	0.34	1.2	99.44
IM11	Ho et al., 2011	Yes	34	113.42	41.03		51.33	1.94	15.22	10.77	0.14	6.52	8.75	3.64	0.99	0.33	1.2	100.83
IM10	Ho et al., 2011	Yes	34	113.42	41.03		51.21	1.87	14.78	10.19	0.13	6.4	8.78	3.26	1.12	0.35	1.97	100.06
IM09B	Ho et al., 2011	Yes	34	113.42	41.03		53.32	1.58	15.04	10.2	0.13	6.14	8.96	3.11	0.91	0.23	1.2	100.82
IM09A	Ho et al., 2011	Yes	9.8	113.42	41.03		50.95	1.89	14.77	10.66	0.14	6.7	9.02	3.11	0.84	0.34	2.4	100.82
IM08	Ho et al., 2011	Yes	9.8	113.42	41.03		51.12	1.84	14.66	10.69	0.14	6.67	9.03	3.1	0.88	0.34	2.19	100.66
IM07	Ho et al., 2011	Yes	9.8	113.42	41.03		50.63	1.83	14.81	10.82	0.15	6.95	8.88	3.22	1.06	0.35	1.2	99.9
IM06	Ho et al., 2011	Yes	9.8	113.42	41.03		50.41	2.02	14.78	10.95	0.15	7.87	8.17	3.56	1.52	0.37	0	99.8
IM05	Ho et al., 2011	Yes	9.8	113.42	41.03		50.81	2.01	15.4	10.91	0.15	7.45	8.52	3.58	1.59	0.39	0	100.81
IM04	Ho et al., 2011	Yes	9.8	113.42	41.03		50.05	1.93	14.63	10.47	0.14	7.48	9.12	3.45	1.49	0.37	1.13	100.26
IM03	Ho et al., 2011	Yes	35.2	113.42	41.03		52.79	1.91	14.6	10.24	0.13	7.29	8.5	2.96	1.09	0.33	1.09	100.93
IM02	Ho et al., 2011	Yes	35.2	113.42	41.03		49.05	2.7	14.5	11.7	0.16	7.73	8.66	3.2	1.32	0.44	0.26	99.72
IM01	Ho et al., 2011	Yes	5.1	113.42	41.03		46.13	2.79	14.69	12.49	0.17	6.88	8.41	3.94	2.66	1.01	1.03	100.2
03R022	Hu et al., 2007	No	113	121.6	37.25	-14.4	57.82	0.88	17.49	6.021	0.1	2.85	5.15	4.46	3.23	0.51	0.659	99.17
03R021	Hu et al., 2007	No	113	121.6	37.25	-12	56.81	0.79	16.97	6.129	0.11	3.89	5.89	4.4	2.74	0.4	0.681	98.81
03R020	Hu et al., 2007	No	113	121.6	37.25	-12.2	57.66	0.84	17.02	5.751	0.1	3.53	5.61	4.34	3.15	0.43	0.629	99.06
03R018	Hu et al., 2007	No	113	121.6	37.25	-15.9	57.38	0.95	17.46	6.192	0.1	2.99	5.41	4.43	3.41	0.52	0.688	99.53
03R017	Hu et al., 2007	No	113	121.6	37.25	-15	57.05	0.95	17.33	6.309	0.1	3.01	5.42	4.34	3.41	0.53	0.701	99.15
03R016	Hu et al., 2007	No	113	121.6	37.25	-12.3	58.41	0.83	16.72	5.967	0.11	3.63	5.47	4.21	3.43	0.41	0.653	99.84
03R015	Hu et al., 2007	No	113	121.6	37.25	-13	59.48	0.66	17.35	5.58	0.1	2.75	5.09	4.51	3.3	0.45	0.63	99.9
ZP10-4	Huang et al., 2012	Yes	128.7	117.63	36.75		55.41	0.93	15.41	8.352	0.14	5	6.97	3.47	2.64	0.5	0.05	99.81
ZP10-3	Huang et al., 2012	Yes	128.7	117.63	36.75		55.6	0.95	15.45	8.253	0.13	4.87	6.9	3.5	2.67	0.5	0.08	99.81
ZP10-2	Huang et al., 2012	Yes	128.7	117.63	36.75		51.04	0.91	12.75	9.144	0.21	9.39	9.04	2.21	2.17	0.32	1.6	99.79
ZP10-1	Huang et al., 2012	Yes	128.7	117.63	36.75		50.82	0.91	12.14	9.189	0.22	9.76	9.51	2.23	2.35	0.31	1.34	99.81
WSH10-9	Huang et al., 2012	Yes	128.7	117.63	36.75		54.59	0.91	14.75	7.965	0.12	6.62	7.45	3.19	2.23	0.44	0.66	99.81
WSH10-7	Huang et al., 2012	Yes	128.7	117.63	36.75		55.02	0.96	15.12	5.562	0.11	6.99	9.39	4.15	0.53	0.45	0.91	99.81
WSH10-6	Huang et al., 2012	Yes	128.7	117.63	36.75		56.35	0.89	16.24	6.462	0.13	4.66	7.77	4.34	1.2	0.39	0.68	99.82
WSH10-5	Huang et al., 2012	Yes	128.7	117.63	36.75		55.53	0.87	15.94	7.704	0.15	4.35	7.05	4.58	1.46	0.37	0.99	99.83
WS-3	Huang et al., 2012	Yes	128.7	117.63	36.75	-14.8	56.18	0.95	16.32	8.208	0.13	3.92	6.53	3.85	2.33	0.37	-0.01	99.69
WS-2	Huang et al., 2012	Yes	128.7	117.63	36.75	-15.7	56.36	0.92	16.35	8.046	0.14	3.93	6.54	3.85	2.25	0.35	0.05	99.69
WS-1	Huang et al., 2012	Yes	128.7	117.63	36.75	-14.7	56.23	0.89	16.24	7.974	0.12	4.01	6.55	3.94	2.49	0.38	-0.02	99.69
JNY10-22	Huang et al., 2012	Yes	127.5	116.96	36.7		53.74	0.72	14.51	8.352	0.15	8.09	8.56	2.77	1.59	0.17	0.21	99.8
JNY10-19	Huang et al., 2012	Yes	127.5	116.96	36.7		53.34	0.77	14.06	8.793	0.16	8.78	8.88	2.66	1.14	0.22	0	99.8
JNW10-6	Huang et al., 2012	Yes	127.5	116.96	36.7		50.48	0.61	12.92	9.27	0.17	11.26	10.98	2.15	0.88	0.14	-0.1	99.78
JNW10-1	Huang et al., 2012	Yes	127.5	116.96	36.7		50.89	0.44	13.51	8.766	0.16	11.91	10.45	2.15	0.57	0.09	-0.12	99.78
JNK10-26	Huang et al., 2012	Yes	127.5	116.96	36.7		49.42	0.88	17.56	9.504	0.13	6.96	10.65	2.77	0.38	0.41	0.06	99.78
JNK10-23	Huang et al., 2012	Yes	127.5	116.96	36.7		49.95	0.6	14.06	10.602	0.18	9.96	10.68	2.13	0.54	0.07	-0.16	99.78
JNF10-11	Huang et al., 2012	Yes	127.5	116.96	36.7		51.75	0.4	16.26	7.713	0.15	9.17	10.18	2.6	0.61	0.07	0.01	99.79
JNF10-10	Huang et al., 2012	Yes	127.5	116.96	36.7		50.59	0.42	16.23	8.298	0.15	9.55	10.66	2.53	0.41	0.06	-0.03	99.78
JNB10-16	Huang et al., 2012	Yes	127.5	116.96	36.7		48.96	0.33	11.22	10.314	0.2	14.18	11.67	1.74	0.22	0.03	-0.22	99.78
JNB10-13	Huang et al., 2012	Yes	127.5	116.96	36.7		50.41	0.48	16.45	8.505	0.15	9.04	10.89	2.67	0.29	0.03	-0.08	99.78
JN-9	Huang et al., 2012	Yes	127.5	116.96	36.7	-8.7	49.86	0.44	12.74	9.306	0.16	13.43	9.91	2.13	0.56	0.08	-0.02	99.64
JN-8	Huang et al., 2012	Yes	127.5	116.96	36.7	-8.4	49.6	0.53	13.27	9.72	0.16	11.33	11.14	2.24	0.64	0.09	-0.17	99.63
JN-7	Huang et al., 2012	Yes	127.5	116.96	36.7	-7.1	50.01	0.54	13.63	9.387	0.16	10.86	10.76	2.35	0.83	0.12	-0.07	99.64
JN-6	Huang et al., 2012	Yes	127.5	116.96	36.7	-8.9	52.75	0.67	14.4	8.82	0.15	8.72	8.86	2.79	1.38	0.17	-0.03	99.66
JN-5	Huang et al., 2012	Yes	127.5	116.96	36.7	-13.7	54.92	0.71	15.75	7.479	0.13	5.9	7.24	3.77	2.37	0.23	0.34	99.67
JN-3	Huang et al., 2012	Yes	127.5	116.96	36.7	-14	55.81	0.71	15.95	7.308	0.13	5.75	7.33	3.93	1.58	0.23	0.16	99.68
JN-2	Huang et al., 2012	Yes	127.5	116.96	36.7		49.97	0.53	13.28	9.36	0.16	11.12	10.99	2.28	0.86	0.12	-0.08	99.64
JN-1	Huang et al., 2012	Yes	127.5	116.96	36.7	-7.3	49.89	0.57	13.26	9.522	0.17	11.02	10.85	2.3	0.89	0.13	-0.03	99.64
CYS-4	Huang et al., 2012	Yes	128.7	117.63	36.75	-12.8	54.64	0.95	15.38	8.847	0.14	5.12	7.43	3.52	2.23	0.36	0.06	99.67
CYS-3	Huang et al., 2012	Yes	128.7	117.63	36.75	-10.2	50.58	0.7	11.39	9.189	0.15	12.34	8.49	2.45	1.71	0.28	1.33	99.64
CYS-2	Huang et al., 2012	Yes	128.7	117.63	36.75	-13.5	53.36	0.81	14.59	9.297	0.15	6.51	8.16	3.29	2.07	0.35	0.03	99.66
CYS10-6	Huang et al., 2012	Yes	128.7	117.63	36.75		54.6	0.86	16.3	8.532	0.14	5.29	7.71	3.41	1.76	0.35	-0.09	99.8
CYS10-4	Huang et al., 2012	Yes	128.7	117.63	36.75		54.81	0.85	15.32	8.64	0.14	5.62	7.28	3.39	2.44	0.38	-0.03	99.8
CYS10-2	Huang et al., 2012	Yes	128.7	117.63	36.75		55.44	0.94	15.09	8.325	0.14	5.42	7.36	3.22	2.43	0.37	0.15	99.8
CYS-1	Huang et al., 2012	Yes	128.7	117.63	36.75	-13.7	54.07	0.93	15.55	9.18	0.14	5.28	7.67	3.48	2.06	0.36	-0.07	99.67
BJ95-04	Jahn et al., 1999	No	125	116.1	31.33		50.72	1.07	20.36	7.839	0.07	2.96	6.44	5.23	1.75	0.79	0.93	99.03
BJ93-23	Jahn et al., 1999	No	125	116.25	30.8		54.15	0.94	9.76	7.92	0.14	11.97	7.18	2.08	1.52	0.3	2.16	99
BJ93-22	Jahn et al., 1999	No	125	116.25	30.8		62.19	0.72	15.65	5.013	0.09	2.37	4.51	3.67	3.33	0.26	0.66	99.02
BJ93-21	Jahn et al., 1999	No	125	116.25	30.8		48.07	0.78	6.95	10.692	0.19	15.94	11.54	1.2	0.94	0.13	1.75	99.37
BJ93-11	Jahn et al., 1999	No	125	116.25	30.8		60.41	0.8	15.35	5.625	0.1	3.36	4.96	3.58	3.2	0.33	0.78	99.12
BJ93-10	Jahn et al., 1999	No	125	116.25	30.8		47.38	1.46	10.84	9.909	0.17	11.08	13.57	1.84	0.93	0.18	0.97	99.43
95DB-13P	Jahn et al., 1999	No	125	116.75	31.02		50.1	1.12	17.3	7.668	0.14	6.47	9.65	3.2	1.23	0.29	0.45	98.47
921-2	Jahn et al., 1999	No	125	116.22	31.27		47.55	0.71	14.03	9.72	0.2	9.5	9.63	2.74	1.48	0.24	3.37	100.25
BJ95-04	Jahn et al., 1999	No	120	116.38	31.2	-16.4	50.72	1.07	20.36	7.839	0.07	2.96	6.44	5.23	1.75	0.79	0.93	99.03
BJ95-03	Jahn et al., 1999	No	120	116.38	31.2	-16.6	47.2	0.34	3.26	10.872	0.21	22.71	12.39	0.36	0.17	0.04	0.46	99.22
BJ93-23	Jahn et al., 1999	No	120	116.38	31.2	-19.8	54.15	0.94	9.76	7.92	0.14	11.97	7.18	2.08	1.52	0.3	2.16	99
BJ93-22	Jahn et al., 1999	No	120	116.38	31.2	-19.9	62.19	0.72	15.65	5.013	0.09	2.37	4.51	3.67	3.33	0.26	0.66	99.02
BJ93-21	Jahn et al., 1999	No	120	116.38	31.2	-16.2	48.07	0.78	6.95	10.692	0.19	15.94	11.54	1.2	0.94	0.13	1.75	99.37
BJ93-11	Jahn et al., 1999	No	120	116.38	31.2	-20.5	60.41	0.8	15.35	5.625	0.1	3.36	4.96	3.58	3.2	0.33	0.78	99.12
BJ93-10	Jahn et al., 1999	No	120	116.38	31.2	-18.6	47.38	1.46	10.84	9.909	0.17	11.08	13.57	1.84	0.93	0.18	0.97	99.43
95DB-13P	Jahn et al., 1999	No	120	116.38	31.2		50.1	1.12	17.3	7.668	0.14	6.47	9.65	3.2	1.23	0.29	0.45	98.47
921-2	Jahn et al., 1999	No	120	116.38	31.2		47.55	0.71	14.03	9.72	0.2	9.5	9.63	2.74	1.48	0.24	3.37	100.25
9212-1	Jahn et al., 1999	No	120	116.38	31.2		46.78	0.92	3.25	9.333	0.16	18.24	17.52	0.25	0.02	0.01	2.41	99.93
HZY-9	Jiang et al., 2010	Yes	155	122.75	40.75	-9.6	52.48	0.9	16.87	7.35	0.1	5.45	5.48	3.69	2.55	0.14	5.33	100.58
HZY-8	Jiang et al., 2010	Yes	155	122.75	40.75	-11.9	57.02	0.67	16.72	5.583	0.1	5.78	4.95	4.08	2.51	0.18	3.25	101.05
HZY-7	Jiang et al., 2010	Yes	155	122.75	40.75	-12.1	55.53	0.71	16.12	5.889	0.11	5.84	5.54	3.68	2.85	0.18	4.37	101.05
HZY-5	Jiang et al., 2010	Yes	155	122.75	40.75	-2.9	49.99	1.29	13.69	8.641	0.14	11.59	6.61	2.49	1.71	0.21	4.42	101.07
HZY-4	Jiang et al., 2010	Yes	155	122.75	40.75	-10.7	54.08	0.68	13.98	6.652	0.12	8.33	6.06	2.65	2.47	0.1	4.52	99.85
HZY-3	Jiang et al., 2010	Yes	155	122.75	40.75	-1.4	49.4	1.09	13.28	8.231	0.13	10.83	7.81	2.59	1.97	0.2	4.59	100.39
HZY-2	Jiang et al., 2010	Yes	155	122.75	40.75	-1.9	49.09	1.08	13.15	8.212	0.13	11.37	6.87	2.18	1.96	0.2	5.62	100.12
HZY-15	Jiang et al., 2010	Yes	155	122.75	40.75	-2.5	45.53	0.9	11.16	8.07	0.13	12.8	6.45	1.32	2.57	0.28	10.94	100.4
HZY-14	Jiang et al., 2010	Yes	155	122.75	40.75	-2.3	44.77	0.98	11.59	7.762	0.12	11.3	6.45	1.13	2.91	0.3	13.01	100.57
HZY-13	Jiang et al., 2010	Yes	155	122.75	40.75	-6.1	52.7	0.85	14.46	7.055	0.11	8.64	4.74	2.74	2.46	0.1	6.8	100.86
HZY-12	Jiang et al., 2010	Yes	155	122.75	40.75	-2.7	47.27	0.7	11.21	7.57	0.12	14.23	5.37	1.06	2.36	0.17	9.91	100.18
HZY-11	Jiang et al., 2010	Yes	155	122.75	40.75	-4.4	52.18	0.83	14.75	6.897	0.11	7.55	6.86	2.88	2.46	0.16	5.9	100.8
HZY-10	Jiang et al., 2010	Yes	155	122.75	40.75	-4.4	49.67	0.94	14.17	7.486	0.13	8.74	6.97	2.01	2.27	0.21	7.89	100.73
ZC-4	Kuang et al., 2012a	No	96	119.87	36.08		50.16	1.48	14.36	11.187	0.13	7.03	9.07	2.67	0.2	0.15	2	99.68
ZC-3	Kuang et al., 2012a	No	96	119.87	36.08	0.34	49.05	1.59	14.9	11.061	0.16	7.15	9.13	2.95	0.23	0.16	2.47	100.07
ZC-1	Kuang et al., 2012a	No	96	119.87	36.08	0.57	49.43	1.58	14.16	11.214	0.13	7.09	9.11	2.71	0.32	0.16	2.52	99.67
JZ-4	Kuang et al., 2012a	No	73.5	120.07	36.13	5.58	44.28	2.59	13.83	12.159	0.19	8.93	9.07	4.65	1.67	0.63	0.15	99.51
JZ-3	Kuang et al., 2012a	No	73.5	120.07	36.13		44.46	2.6	13.88	12.231	0.19	9.01	9.1	4.12	1.69	0.62	0.21	99.47
JZ-2	Kuang et al., 2012a	No	73.5	120.07	36.13	5.75	44.61	2.64	13.8	12.348	0.19	9.07	9.2	3.97	1.55	0.63	0.06	99.46
JZ-1	Kuang et al., 2012a	No	73.5	120.07	36.13		44.61	2.61	13.79	12.276	0.18	9.12	9.16	3.97	1.56	0.62	0.15	99.39
LHT-9	Kuang et al., 2012b	Yes	70.1	124.04	41.85	1.85	47.09	2.32	12.8	11.376	0.15	8.52	7.56	4.36	1.26	0.38	2.35	99.42
LHT-7	Kuang et al., 2012b	Yes	70.1	124.04	41.85	2.97	47.53	2.38	13.23	11.574	0.16	8.49	7.48	4.08	1.15	0.38	1.9	99.63
LHT-6	Kuang et al., 2012b	Yes	70.1	124.04	41.85	2.33	49.09	2.37	13.06	11.628	0.16	8.67	7.73	3.95	1.15	0.38	1.73	100.2
LHT-3	Kuang et al., 2012b	Yes	70.1	124.04	41.85		47.71	2.37	12.94	11.673	0.16	8.74	7.71	3.98	1.08	0.39	1.56	99.61
LHT-25	Kuang et al., 2012b	Yes	60.1	124.04	41.85	5.5	49.07	1.52	14.47	11.16	0.15	9.52	9.09	2.87	0.41	0.16	0.53	100.17
LHT-23	Kuang et al., 2012b	Yes	60.1	124.04	41.85		49.21	1.59	14.41	11.736	0.16	8.12	9	2.78	0.32	0.17	0.82	99.63
LHT-20	Kuang et al., 2012b	Yes	60.1	124.04	41.85	3.22	49.04	1.48	14.36	11.691	0.16	8.81	8.97	2.9	0.29	0.15	0.98	100.13
LHT-18	Kuang et al., 2012b	Yes	60.1	124.04	41.85	3.3	49.57	1.57	14.55	11.655	0.16	8.03	9.1	2.93	0.3	0.17	1.04	100.37
LHT-16	Kuang et al., 2012b	Yes	60.1	124.04	41.85	3.39	48.61	1.5	14.37	11.7	0.16	8.51	8.88	2.69	0.27	0.15	1.49	99.63
LHT-15	Kuang et al., 2012b	Yes	60.1	124.04	41.85	3.44	48.92	1.51	14.25	11.862	0.16	8.78	8.84	2.91	0.29	0.16	1.16	100.14
LHT-14	Kuang et al., 2012b	Yes	60.1	124.04	41.85	3.35	49.4	1.55	14.35	11.736	0.16	8.37	8.76	2.88	0.56	0.16	0.9	100.13
LHT-11	Kuang et al., 2012b	Yes	70.1	124.04	41.85		45.58	2.32	12.41	11.304	0.16	8.57	6.72	4.41	1.1	0.36	5.64	99.84
LHT-1	Kuang et al., 2012b	Yes	70.1	124.04	41.85	2.39	47.59	2.41	12.76	11.754	0.16	8.85	7.29	4.27	1.12	0.4	2.09	99.99
10LX13-1	Lan et al., 2013	Yes	130	117.633	36.2	-13.5	54.7	0.49	11.3	6.885	0.12	10.92	7.54	4.28	0.43	0.1	2.14	99.6
10LX11-1	Lan et al., 2013	Yes	130	117.633	36.2	-12.3	54.4	0.51	11.3	7.047	0.1	11.14	7.66	4.24	0.52	0.14	2.16	99.9
LX166A1	Li et al., 2018	Yes	127.1	117.3	35.2	-1.7	49.99	0.72	14.3	6.102	0.11	4.77	7.54	3.8	4.03	1.03	5.6	97.992
LX165A2	Li et al., 2018	Yes	124.6	117.3	35.2	-4.6	45.04	0.96	12.18	6.975	0.12	7.84	9.85	3.3	3.15	0.93	7.59	97.935
LX165A1	Li et al., 2018	Yes	124.6	117.3	35.2	-5.6	47.34	0.94	12.29	7.353	0.13	9.87	9.43	3.05	2.57	0.9	3.93	97.803
LX149B	Li et al., 2018	Yes	128.5	117.3	35.2	1.4	52.95	1.03	12.78	6.372	0.1	7.53	7.15	4.66	1.54	0.33	4.62	99.062
LX149A	Li et al., 2018	Yes	128.5	117.3	35.2	2.3	54.68	1.07	13.19	6.849	0.11	7.41	5.7	5.11	1.22	0.34	3.6	99.279
LX090B1	Li et al., 2018	Yes	133	117.3	35.2	-12.4	50.41	0.35	8.51	7.848	0.15	14.9	13.15	1.46	0.69	0.06	1.54	99.068
LX045C	Li et al., 2018	Yes	128.5	117.3	35.2		55.32	0.63	17.41	7.317	0.07	2.7	3.13	4.77	3	0.28	4.59	99.217
LX045A	Li et al., 2018	Yes	128.5	117.3	35.2		55.81	0.57	17.86	6.849	0.06	2.82	2.67	4.55	3.47	0.29	4.42	99.369
LX043G	Li et al., 2018	Yes	128.5	117.3	35.2		50.67	0.77	11.72	7.884	0.07	11	6.25	4.71	0.21	0.18	5.35	98.814
LX043F	Li et al., 2018	Yes	128.5	117.3	35.2		48.44	0.73	11.32	7.488	0.06	10.35	8.45	4.46	0.19	0.18	7.26	98.928
LX043E	Li et al., 2018	Yes	128.5	117.3	35.2		56.41	0.71	18.9	7.02	0.02	3.07	1.44	7.11	0.72	0.3	3.64	99.34
LX043D	Li et al., 2018	Yes	128.5	117.3	35.2		54.69	0.73	17.48	7.002	0.02	2.69	3.84	6.72	0.89	0.27	5.11	99.442
LX043B	Li et al., 2018	Yes	128.5	117.3	35.2	-7.1	51.4	0.75	11.73	8.298	0.08	11.4	5.01	4.03	0.2	0.19	5.86	98.948
LX043A	Li et al., 2018	Yes	128.5	117.3	35.2	-6.3	48.88	0.73	11.42	7.605	0.07	10	8.37	4.05	0.21	0.18	7.43	98.945
LX042A	Li et al., 2018	Yes	128.5	117.3	35.2	-8.2	52.9	0.6	15.24	5.985	0.09	4.37	5.98	3.61	2.87	0.24	6.94	98.825
LX036B	Li et al., 2018	Yes	128.5	117.3	35.2		54.4	0.67	16.74	6.057	0.04	3.34	5.78	5.45	0.39	0.25	5.82	98.937
LX036A	Li et al., 2018	Yes	128.5	117.3	35.2		54.1	0.69	16.68	5.301	0.04	3.63	6.36	5.45	0.44	0.25	6.3	99.241
D18-E-Q4	Li et al., 2021	Yes	126	124.25	40.2		47.9	0.31	18.3	6.674	0.16	9.17	12.69	1.39	0.6	0.03	2.62	99.91
D18-E-Q3	Li et al., 2021	Yes	126	124.25	40.2		47.4	0.28	19.9	5.445	0.13	7.67	13.01	1.48	1.1	0.04	3.15	99.71
D18-E-Q2	Li et al., 2021	Yes	126	124.25	40.2		47.4	0.3	19.7	5.788	0.15	8.08	12.74	1.5	1.06	0.04	3.2	99.96
D18-E-Q1	Li et al., 2021	Yes	126	124.25	40.2		48	0.28	19.8	5.796	0.15	7.78	12.99	1.49	0.96	0.04	2.46	99.8
LLW50-19	Liang et al., 2020	Yes	117.5	120.48	37.42	-15	50.27	0.8	13.93	6.479	0.13	9.2	8.53	2.38	2.15	0.29	0.9	95.2
LLW50-1	Liang et al., 2020	Yes	117.5	120.48	37.42	-13.2	45.31	0.72	12.09	6.628	0.13	11.05	8.08	1.66	2.12	0.22	12.43	100.6
WJ8	Liu et al., 2006	No	120	122.12	37.42	-10.4	51.26	0.15	18.4	6.451	0.19	5.22	8.59	2.9	2.25	0.26	3.4	99.66
WJ1	Liu et al., 2006	No	120	122.12	37.42		51.99	0.37	19.63	6.205	0.18	4.81	7.24	2.86	2.26	0.42	2.69	99.5
WF2	Liu et al., 2006	No	120	122.12	37.42	-10.7	49.95	0.12	16.87	6.196	0.15	6.54	8.5	3.19	1.93	0.2	3.13	99.42
SW1	Liu et al., 2006	Yes	120	118.22	36.5	-15.7	50.06	0.23	18.1	8.515	0.18	6.04	6.15	3.64	1.49	0.3	4.2	99.64
NS1	Liu et al., 2006	Yes	120	118.22	36.5	-8	45.04	0.4	16.87	7.974	0.21	4.81	15.51	3.47	2.19	0.4	1.2	99.91
MSH1	Liu et al., 2006	Yes	120	118.22	36.5	-11.8	52.12	0.06	18.94	7.898	0.2	5.38	6.33	3.61	2.02	0.17	2.2	99.97
LQ3	Liu et al., 2006	Yes	120	118.22	36.5	-9.1	51.43	0.12	22.7	5.748	0.11	1.71	8.17	3.97	2.77	0.2	1.25	99.47
LM1	Liu et al., 2006	No	105	120.42	37.5	-15.8	48.26	0.25	17.18	7.335	0.16	10.05	10.7	2.37	1	0.25	1.02	99.89
LH2	Liu et al., 2006	No	120	122.12	37.42	-10.6	51.38	0.11	18.4	6.22	0.15	7.31	7.56	2.81	1.83	0.22	2.2	99.47
LCII8	Liu et al., 2006	No	129	120.42	37.5	-13.7	46.99	0.55	16.26	6.536	0.18	8.64	9.43	2.71	1.82	0.3	3.5	99.7
LCII6	Liu et al., 2006	No	128	120.42	37.5	-14.9	46.58	0.27	17.32	5.823	0.15	7.98	11.9	3.36	1.66	0.3	3.15	99.74
LCI7	Liu et al., 2006	No	110	120.42	37.5	-13.5	45.18	0.12	17.63	7.684	0.19	9.05	12.79	2.27	1.92	0.22	2.01	100.67
LCI5	Liu et al., 2006	No	110	120.42	37.5	-12.7	47.16	0.28	17.32	6.729	0.2	8.02	11.42	2.61	2.47	0.3	2	99.96
KL8	Liu et al., 2006	Yes	120	118.22	36.5		49.02	0.15	18.02	8.774	0.25	7.59	9.19	2.54	1.12	0.37	1.9	99.98
KL1	Liu et al., 2006	Yes	120	118.22	36.5	-15.3	49.83	1.29	17.79	8.368	0.17	5.75	9.88	1.89	0.76	0.48	1.87	99.43
KJ8	Liu et al., 2006	Yes	120	118.22	36.5	-14.1	52.17	0.36	20.61	8.359	0.18	3.17	6.38	3.43	2.1	0.2	2.21	99.87
KJ1	Liu et al., 2006	Yes	120	118.22	36.5	-6	51.51	0.24	20.16	7.253	0.21	2.51	5.53	3.72	3.23	0.25	3.76	99.69
GS1	Liu et al., 2006	No	120	122.12	37.42	-12.2	51.95	0.43	15.97	6.515	0.17	6.54	8.97	2.86	1.91	0.22	2.53	99.55
GCH7	Liu et al., 2006	Yes	120	118.13	35.67	-6.7	51.59	0.68	14.72	8.187	0.19	10.49	9.04	1.29	0.46	0.1	1.4	99.59
GCH6	Liu et al., 2006	Yes	120	118.13	35.67		49.7	0.77	12.58	10.373	0.21	11.31	9.84	0.88	0.56	0.16	1.35	99.38
GCH4	Liu et al., 2006	Yes	120	118.13	35.67		52.75	0.95	14.42	8.711	0.18	7.67	8.83	1.91	0.49	0.25	1.64	99.48
GCH2	Liu et al., 2006	Yes	120	118.13	35.67	-7.5	48.73	0.83	7.97	11.13	0.21	14.95	10.11	0.68	0.43	0.2	1.2	99.31
DK9	Liu et al., 2006	No	113	121.42	37.42	-16.5	51.09	0.31	18.71	6.342	0.14	6.63	7.42	2.94	2.32	0.27	2.64	99.4
DK3	Liu et al., 2006	No	120	122.12	37.42	-17.6	48.37	0.12	17.18	7.007	0.18	7.67	9.08	2.9	2.04	0.32	3.54	99.43
CZ2	Liu et al., 2006	No	120	122.12	37.42	-10.9	52.49	0.08	18.4	7.012	0.14	4.67	4.8	3.09	2.74	0.3	3	99.29
CG2	Liu et al., 2006	No	109	121.42	37.42	-14.5	45.02	0.56	18.18	7.741	0.16	9.74	8.87	2.71	2.07	0.31	2.5	99.66
ZC6	Liu et al., 2008a	Yes	143	118.06	35.67	-6.5	51.42	0.89	16.98	8.613	0.17	3.47	6.98	3.43	3.23	1.02	2.24	99.4
ZC5	Liu et al., 2008a	Yes	143	118.06	35.67		50.39	0.93	16.59	9.234	0.14	4.14	7.74	3.83	2.94	1.01	1.36	99.33
ZC4	Liu et al., 2008a	Yes	143	118.06	35.67	-6.7	51.27	0.86	16.26	8.595	0.15	3.89	7.41	4	2.59	0.95	2.35	99.28
ZC3	Liu et al., 2008a	Yes	143	118.06	35.67	-6.7	51.29	0.87	16.86	8.784	0.17	3.59	7.1	3.42	2.3	0.98	2.87	99.21
ZC2	Liu et al., 2008a	Yes	143	118.06	35.67	-6.8	50.97	0.95	16.92	9.009	0.18	3.96	7.12	3.5	2.36	1.07	2.05	99.08
ZC1	Liu et al., 2008a	Yes	143	118.06	35.67	-7.1	51.53	0.86	17.2	8.856	0.16	3.38	6.83	3.63	2.49	0.79	2.12	98.83
MY9	Liu et al., 2008a	Yes	144	118.04	36.69	-4.4	47.95	0.92	12.44	11.25	0.23	12.42	10.83	1.4	0.49	0.16	0.63	99.97
MY8	Liu et al., 2008a	Yes	144	118.04	36.69	-5.5	48.25	0.59	11.69	10.836	0.23	13.95	11.4	0.78	0.53	0.02	0.59	100.07
MY7	Liu et al., 2008a	Yes	144	118.04	36.69	-5.4	51.16	0.56	12.79	9.468	0.2	12.92	9.3	1.98	0.48	0.06	0.03	99.99
MY6	Liu et al., 2008a	Yes	144	118.04	36.69	-6.5	48.63	0.65	12.09	11.709	0.23	13.92	9.9	1.45	0.76	0.11	0.05	100.79
MY4	Liu et al., 2008a	Yes	144	118.04	36.69	-6.5	51.78	0.76	14.43	8.982	0.19	9.66	8.98	2.88	0.62	0.21	0.64	100.11
MY3	Liu et al., 2008a	Yes	144	118.04	36.69	-5.4	49.68	0.53	12.36	9.513	0.19	13.39	9.68	1.95	0.46	0.06	1.1	99.97
MY2	Liu et al., 2008a	Yes	144	118.04	36.69		48.36	0.55	8.16	11.367	0.21	17.97	10.28	1.15	0.5	0.04	0.2	100.05
MY1	Liu et al., 2008a	Yes	144	118.04	36.69	-5	48.54	0.75	9.81	11.052	0.21	14.46	11.8	1.05	0.7	0.03	0.35	99.99
ZB-15	Liu et al., 2008b	Yes	22.8	115.58	37.55		48.8	1.9	14.5	10.08	0.13	7.66	8.1	2.86	1.17	0.36	2.89	99.5
ZB-12	Liu et al., 2008b	Yes	22.8	115.58	37.55		49.5	1.91	14.4	10.26	0.14	8	8.05	2.8	1.06	0.33	2.52	100
ZB-10	Liu et al., 2008b	Yes	22.8	115.58	37.55		48.7	1.91	14.4	10.17	0.14	8.81	7.78	2.68	1.07	0.33	3.12	100
ZB-02	Liu et al., 2008b	Yes	22.8	115.58	37.55		45.3	2.66	14.2	12.15	0.16	8.04	8.72	2.86	1.95	0.8	1.7	99.9
YX-30	Liu et al., 2008b	Yes	125	121.24	41.53		49.6	0.73	12.5	8.226	0.14	12.8	7.59	3.25	1.45	0.68	1.75	99.6
YX-27	Liu et al., 2008b	Yes	125	121.24	41.53		49.3	0.71	12.5	8.559	0.14	13.9	7.46	2.98	1.26	0.67	1.76	100
YX-26	Liu et al., 2008b	Yes	125	121.24	41.53		48.9	0.69	12.4	8.604	0.14	14.4	7.44	2.89	1.22	0.66	1.84	100
YX-25	Liu et al., 2008b	Yes	125	121.24	41.53		49.3	0.71	12.5	8.631	0.14	14.1	7.57	2.99	1.27	0.68	1.57	100
YX-108	Liu et al., 2008b	Yes	125	121.24	41.53		49.3	0.7	12.4	8.469	0.15	14	7.3	2.99	1.29	0.67	2.08	100
YX-103	Liu et al., 2008b	Yes	125	121.24	41.53		49.3	0.7	12.3	8.523	0.15	14	7.48	3.13	1.27	0.67	1.19	99.6
YT-53	Liu et al., 2008b	No	10.4	124.95	43.24		44.8	2.25	14.3	10.26	0.16	10.3	8.52	2.92	2.56	0.63	1.87	99.6
YT-02	Liu et al., 2008b	No	10.4	124.95	43.24		50.1	1.95	15.5	10.17	0.14	7.72	7.61	3.76	1.85	0.6	1.46	102
YT-01	Liu et al., 2008b	No	10.4	124.95	43.24		50.5	2	15.5	10.17	0.14	7.87	7.25	3.96	2.12	0.59	0.55	102
WF2-7	Liu et al., 2008b	Yes	39.34	122.55	39.75		44.7	2.49	12.2	11.25	0.15	10.1	12.3	1.88	1.09	0.29	1.81	99.5
WF2-4	Liu et al., 2008b	Yes	39.34	122.55	39.75		43.6	2.49	12	11.07	0.15	9.98	11.9	1.92	1.11	0.29	3.78	99.5
WF2-2	Liu et al., 2008b	Yes	39.34	122.55	39.75		45.1	2.45	12.3	11.25	0.14	10.1	11.8	1.86	1.1	0.28	2.38	100
WF2-1	Liu et al., 2008b	Yes	39.34	122.55	39.75		44.7	2.44	12.1	11.16	0.15	10.2	11.9	1.88	1.13	0.29	2.85	100
WF1-2	Liu et al., 2008b	Yes	36.33	122.55	39.75		44.3	2.06	12.9	10.89	0.17	8.64	12.7	1.91	1.31	0.44	3.12	99.6
WF1-1	Liu et al., 2008b	Yes	36.33	122.55	39.75		43.3	2	12.5	10.71	0.16	8.13	12.8	1.74	1.36	0.42	5.52	99.8
SFX-49	Liu et al., 2008b	Yes	119.1	118.04	35.04		48.5	1.13	11.7	8.055	0.12	13.6	8.87	2.05	2.24	0.68	2.09	99.8
SFX30	Liu et al., 2008b	Yes	119.1	118.04	35.04		48.9	1.08	11.7	8.028	0.12	13.6	8.84	2.43	2.08	0.65	1.47	99.8
SFX28	Liu et al., 2008b	Yes	119.1	118.04	35.04		49.5	1.07	11.9	7.866	0.12	13.1	8.76	2.19	2.53	0.65	1.07	99.5
SFX27	Liu et al., 2008b	Yes	119.1	118.04	35.04		49.2	1.07	11.9	7.875	0.12	13	8.74	2.18	2.72	0.64	0.94	99.3
SFX19	Liu et al., 2008b	Yes	119.1	118.04	35.04		48.7	1.1	12	7.974	0.12	13.4	8.79	2.23	2.62	0.64	1.44	99.9
SFX13	Liu et al., 2008b	Yes	119.1	118.04	35.04		48.6	1.1	11.8	7.965	0.12	13.6	8.78	1.93	2.62	0.66	1.48	99.5
SFX02	Liu et al., 2008b	Yes	119.1	118.04	35.04		48.8	1.09	12.1	8.046	0.12	12.7	8.82	2.37	2.29	0.68	1.52	99.4
QX-99	Liu et al., 2008b	Yes	7.15	120.85	37.34		39.7	2.51	11.2	13.14	0.21	9.75	13.2	3.19	1.64	0.91	2.71	99.6
QX-92	Liu et al., 2008b	Yes	7.15	120.85	37.34		39.9	2.51	11.4	13.23	0.21	10.3	11.4	4.06	2.33	0.85	2.02	99.6
QX-77	Liu et al., 2008b	Yes	7.15	120.85	37.34		39.8	2.5	11.4	13.23	0.21	10.3	11.6	3.9	2.26	0.92	2.03	99.6
QX-73	Liu et al., 2008b	Yes	7.15	120.85	37.34		39.7	2.53	11.2	13.23	0.21	10.7	11.3	3.76	2.18	0.8	2.59	99.6
QX-72	Liu et al., 2008b	Yes	7.15	120.85	37.34		39.9	2.52	11.1	13.41	0.21	10.8	11.5	3.91	2.26	0.76	1.79	99.6
QX-103	Liu et al., 2008b	Yes	7.15	120.85	37.34		39.7	2.51	11.3	13.14	0.21	10.3	11.5	3.75	2.2	0.82	2.66	99.6
NS99-16	Liu et al., 2008b	No	1.41	120.93	30.83		43.7	2.22	13.8	11.88	0.17	9.1	7.85	5.39	3.18	1.21	0.32	100
NS99-06	Liu et al., 2008b	No	1.41	120.93	30.83		43.5	2.23	13.8	11.97	0.18	9.06	8	4.37	1.87	1.22	2.5	100
LS99-03	Liu et al., 2008b	No	1.41	120.93	30.83		46.7	2.78	12.8	10.98	0.16	9.27	8.61	2.2	1.82	0.73	3.03	100
LS99-01	Liu et al., 2008b	No	1.41	120.93	30.83		45.6	2.78	13.2	12.06	0.17	9.11	8.83	2.96	1.93	0.7	1.53	100
FS00-59	Liu et al., 2008b	No	8.6	118.77	34.54		47.6	2.14	14	10.17	0.14	10.2	7.21	3.22	2.37	0.51	0.92	99.6
FS00-55	Liu et al., 2008b	No	8.6	118.77	34.54		47.4	2.16	14	10.26	0.14	9.5	7.25	3.39	1.91	0.51	1.96	99.6
FS00-02	Liu et al., 2008b	No	8.6	118.77	34.54		47	2.14	13.9	10.35	0.14	9.63	7.45	3.53	2.02	0.52	1.85	99.6
DD19-3	Liu et al., 2008b	Yes	81.58	122.25	39.5		43.5	2.64	13.5	12.33	0.2	8.82	12.6	2.42	0.89	0.56	1.83	101
DD19-2	Liu et al., 2008b	Yes	81.58	122.25	39.5		43.7	2.58	14.1	12.33	0.2	7.86	12.4	2.61	0.87	0.6	1.98	101
DD19-1	Liu et al., 2008b	Yes	81.58	122.25	39.5		44	2.57	14	12.33	0.2	7.87	12.4	2.45	1.02	0.59	1.84	101
DD18-4	Liu et al., 2008b	Yes	58.36	122.25	39.5		45.3	2.28	10.6	11.88	0.18	14.3	10.4	2.12	0.71	0.42	1.29	101
DD18-1	Liu et al., 2008b	Yes	58.36	122.25	39.5		45.6	2.49	11.7	11.61	0.17	12.8	10.4	2.31	0.8	0.45	1.14	101
B6-7	Liu et al., 2009	Yes	125.4	120.52	36.89		48.39	1.62	14.67	10.134	0.15	8.26	9.15	3.41	1.3	0.3	1.19	99.71
B6-6	Liu et al., 2009	Yes	125.4	120.52	36.89		48.28	1.63	14.59	10.269	0.16	8.32	9.19	3.34	1.28	0.25	1.48	99.93
B6-5	Liu et al., 2009	Yes	125.4	120.52	36.89		47.5	1.61	13.85	10.638	0.16	8.44	9.31	2.74	1	0.34	2.66	99.42
B6-4	Liu et al., 2009	Yes	125.4	120.52	36.89	-15	47.1	1.6	14.2	10.755	0.18	8.39	9.42	2.74	1.14	0.4	2.92	100.04
B6-3	Liu et al., 2009	Yes	125.4	120.52	36.89		47.09	1.62	13.92	10.638	0.17	8.28	9.22	2.7	1.08	0.35	3.78	100.03
B6-2	Liu et al., 2009	Yes	125.4	120.52	36.89		46.32	1.44	14.2	10.449	0.1	7.84	8.59	2.79	0.59	0.22	3.83	99.54
B6-1	Liu et al., 2009	Yes	125.4	120.52	36.89	-14.8	48.7	1.4	14.33	10.719	0.15	7.7	8.57	2.58	0.58	0.21	3.25	99.39
B5-2	Liu et al., 2009	Yes	123.7	120.52	36.89	-15	50.62	1.26	16.37	6.219	0.15	5.2	6.93	3.43	3.59	0.69	2.52	99.68
B5-1	Liu et al., 2009	Yes	123.7	120.52	36.89	-15.1	50.9	1.27	16.48	8.064	0.15	5.17	7	3.44	3.66	0.7	2.13	99.85
B4-3	Liu et al., 2009	Yes	122.5	120.52	36.89	-15.1	50.69	1.29	16.2	8.127	0.15	5.12	7.04	3.11	3.62	0.69	2.98	99.91
B4-2	Liu et al., 2009	Yes	122.5	120.52	36.89		50.52	1.3	16.14	8.208	0.15	5.35	7.18	3.02	3.39	0.71	2.62	99.5
B4-1	Liu et al., 2009	Yes	122.5	120.52	36.89	-15.2	50.66	1.25	16.17	8.685	0.18	5.27	7.09	3.09	3.4	0.68	2.33	99.77
B3-3	Liu et al., 2009	Yes	126.9	120.52	36.89	-15.3	50.37	1.27	16.08	8.109	0.16	5.19	7.09	2.99	3.33	0.69	2.89	99.06
B3-2	Liu et al., 2009	Yes	126.9	120.52	36.89		50.69	1.28	16.06	8.082	0.15	5.06	6.84	3.09	3.26	0.69	3.12	99.22
B3-1	Liu et al., 2009	Yes	126.9	120.52	36.89	-15.2	50.83	1.29	16.09	8.064	0.15	5.41	7	3.01	3.27	0.69	3.05	99.75
B1-3	Liu et al., 2009	Yes	124.8	120.52	36.89	-13.9	50.63	1.25	15.94	8.487	0.12	5.57	7.25	3.19	3.48	0.69	1.77	99.32
B1-2	Liu et al., 2009	Yes	124.8	120.52	36.89		49.32	1.26	14.68	9.666	0.11	5.97	7.95	3.38	3.64	0.68	1.73	99.47
B1-1	Liu et al., 2009	Yes	124.8	120.52	36.89	-14	50.1	1.28	15.47	8.631	0.11	6.1	7.9	2.85	3.64	0.67	2.01	99.73
ZJ026	Liu et al., 2010	Yes	138	115.08	39.33	-14.7	53.42	1.18	14.98	8.109	0.13	7.35	8.3	3.44	1.52	0.29	0.36	99.97
ZJ025	Liu et al., 2010	Yes	138	115.08	39.33	-14.5	53.75	1.12	15.94	7.704	0.13	6.61	8.18	3.77	1.69	0.39	0.001	100.01
ZJ024	Liu et al., 2010	Yes	138	115.08	39.33	-13.8	54.23	1.23	16.1	7.533	0.12	5.88	7.64	3.78	2.18	0.44	0.01	100
ZJ015	Liu et al., 2010	Yes	138	115.08	39.33		47.2	1.65	18.17	6.507	0.08	9.61	10.13	2.8	1.34	0.06	1.62	99.88
ZJ014	Liu et al., 2010	Yes	138	115.08	39.33		49.29	1.49	18.46	6.381	0.07	7.61	8.4	3.78	1.48	0.09	2.08	99.85
ZJ013	Liu et al., 2010	Yes	138	115.08	39.33		48.48	2.26	15.07	7.74	0.09	9.86	9.14	2.96	1.67	0.1	1.65	99.86
ZJ009	Liu et al., 2010	Yes	138	115.08	39.33		47.88	1.63	19.23	5.886	0.08	7.43	11.28	2.93	1.08	0.1	1.69	99.85
ZJ007	Liu et al., 2010	Yes	138	115.08	39.33		52.55	1.18	15.78	8.019	0.12	7.13	8.11	3.62	1.51	0.42	0.61	99.95
ZJ006	Liu et al., 2010	Yes	138	115.08	39.33	-13.9	54.14	1.14	15.95	7.398	0.12	6.47	7.9	3.72	1.89	0.34	0.1	99.99
ZJ005	Liu et al., 2010	Yes	138	115.08	39.33		54.22	1.2	16.32	7.326	0.12	5.76	7.62	3.83	2.12	0.46	0.19	99.98
ZJ004	Liu et al., 2010	Yes	138	115.08	39.33	-14.6	54.56	1.15	15.7	7.551	0.12	6.47	7.68	3.63	1.89	0.33	0.07	99.99
ZJ003	Liu et al., 2010	Yes	138	115.08	39.33	-14.6	54.45	1.16	15.52	7.533	0.12	6.52	7.74	3.66	1.94	0.42	0.09	99.99
PS16	Liu et al., 2011	No	120.5	118.84	35.17		51.53	1.14	15.52	7.956	0.16	6.61	7.68	2.62	2.55	0.46	2.34	99.45
PS15	Liu et al., 2011	No	120.5	118.84	35.17	-17.4	51.35	1.12	15.83	7.704	0.15	6.58	7.66	2.66	2.46	0.43	2.58	99.38
PS14	Liu et al., 2011	No	120.5	118.84	35.17		51.45	1.12	15.92	8.046	0.18	6.63	7.56	2.94	2.74	0.47	1.58	99.53
PS13	Liu et al., 2011	No	120.5	118.84	35.17	-17	51.43	1.14	15.36	7.929	0.23	6.22	8.27	3.03	2.65	0.48	2.16	99.78
PS12	Liu et al., 2011	No	120.5	118.84	35.17	-17.1	51.82	1.06	15.03	7.713	0.18	6.68	8.05	2.77	2.48	0.46	2.45	99.55
PS11	Liu et al., 2011	No	120.5	118.84	35.17		51.42	1.08	15.82	7.686	0.17	6.92	7.24	2.84	3.06	0.47	1.55	99.11
PS10	Liu et al., 2011	No	120.5	118.84	35.17	-17	51.37	1.14	16.08	7.857	0.16	6.21	7.53	3.05	3.15	0.45	1.86	99.73
PS09	Liu et al., 2011	No	120.5	118.84	35.17	-17.5	51.49	1.13	15.63	8.136	0.15	6.64	7.72	2.83	2.64	0.48	1.48	99.23
PS08	Liu et al., 2011	No	120.5	118.84	35.17	-17.2	51.45	0.83	15.15	7.065	0.14	8.83	6.75	2.43	2.24	0.4	2.56	98.63
PS07	Liu et al., 2011	No	120.5	118.84	35.17		51.65	0.85	14.56	7.407	0.13	8.64	7.52	2.46	2.28	0.42	2.21	98.95
PS06	Liu et al., 2011	No	120.5	118.84	35.17	-17.1	50.78	0.86	15.04	8.397	0.14	9.65	7.38	2.71	2.53	0.51	0.32	99.25
PS05	Liu et al., 2011	No	120.5	118.84	35.17		51.54	0.85	14.25	7.119	0.12	8.86	7.71	2.96	2.55	0.28	2.34	99.37
PS04	Liu et al., 2011	No	120.5	118.84	35.17	-17.4	49.73	0.84	15.05	7.308	0.13	9.18	8.05	2.64	2.46	0.43	2.63	99.26
PS03	Liu et al., 2011	No	120.5	118.84	35.17	-17.5	50.46	0.83	15.16	7.119	0.12	8.91	6.82	3.06	2.75	0.46	2.63	99.11
PS02	Liu et al., 2011	No	122.4	118.84	35.17		51.38	0.96	16.41	6.687	0.13	5.63	7.61	3.05	3.21	0.93	2.55	99.29
PS01	Liu et al., 2011	No	118.7	118.84	35.17	-17.4	50.75	0.82	14.73	7.515	0.14	9.38	7.76	2.53	2.32	0.44	2.23	99.45
JS-d8	Liu et al., 2012	No	111.8	117.18	32.95	-6.07	45.18	1.45	16.16	9.415	0.19	7.43	11.07	3.1	1.44	0.63	3.27	99.63
JS-d7	Liu et al., 2012	No	111.8	117.18	32.95	-5.96	43.62	1.65	15.02	9.302	0.17	8.77	10.1	2.82	0.93	0.64	6.21	99.54
JS-d6	Liu et al., 2012	No	111.8	117.18	32.95	-5.84	44.96	1.48	16.08	9.618	0.2	7.73	10.8	2.76	1.75	0.74	2.84	99.28
JS-d2	Liu et al., 2012	No	111.8	117.18	32.95	-5.89	43.08	1.4	14.9	9.67	0.16	8.68	10.45	2.95	1.21	0.58	5.81	99.27
JS-d1	Liu et al., 2012	No	111.8	117.18	32.95	-5.87	42.12	1.29	14.68	9.331	0.16	8.15	11.15	2.55	1.54	0.52	7.38	99.2
HLS-d3	Liu et al., 2012	No	111.8	117.18	32.95		49.9	1.78	17.18	9.76	0.15	4.5	7.55	3.81	2.36	0.88	1.42	99.67
04JS-d3	Liu et al., 2012	No	111.8	117.18	32.95	-6.03	45.7	1.31	16.18	10.161	0.2	7.32	10.18	3.06	1.18	0.59	3.16	99.42
04JS-d2	Liu et al., 2012	No	111.8	117.18	32.95	-5.83	44.8	1.8	15.48	9.704	0.18	7.5	10.86	2.79	1.99	0.7	2.99	99.5
04JS-d1	Liu et al., 2012	No	111.8	117.18	32.95	-5.96	44.2	1.76	15.69	9.394	0.18	7.86	10.56	2.48	2.56	0.65	3.73	99.41
WL9	Liu et al., 2020	Yes	126	124.25	40.2		55.91	0.79	16.08	6.426	0.1	5.97	6.31	3.25	1.88	0.16	1.84	99.41
WL8	Liu et al., 2020	Yes	126	124.25	40.2		58.43	0.73	16.02	5.337	0.08	5.27	5.85	3.52	2.49	0.19	1.06	99.55
WL7	Liu et al., 2020	Yes	126	124.25	40.2	-18.3	56.37	0.78	15.79	6.624	0.11	6.35	6.09	2.73	2.62	0.17	1.29	99.66
WL6	Liu et al., 2020	Yes	126	124.25	40.2		56.81	0.81	15.69	6.282	0.1	5.86	6.35	3.14	2.27	0.22	1.33	99.54
WL5	Liu et al., 2020	Yes	126	124.25	40.2		56.58	0.75	16	6.561	0.11	5.78	6.79	2.68	1.81	0.18	1.66	99.62
WL4	Liu et al., 2020	Yes	126	124.25	40.2	-17.8	55.52	0.82	16.2	6.687	0.11	6.04	6.72	2.87	2.03	0.18	1.86	99.77
WL3	Liu et al., 2020	Yes	126	124.25	40.2	-18.2	56.51	0.78	15.9	6.507	0.1	5.95	6.53	2.89	2.26	0.18	1.04	99.36
WL2	Liu et al., 2020	Yes	126	124.25	40.2		58.92	0.8	16.74	5.526	0.09	3.98	5.64	3.48	2.86	0.21	1.24	100.11
WL18	Liu et al., 2020	Yes	119	124.25	40.2	4.3	48.52	2.26	15.54	10.26	0.13	4.71	7.18	3.42	1.94	0.68	4.47	100.25
WL17	Liu et al., 2020	Yes	119	124.25	40.2	3.6	45.81	3.28	14.9	12.402	0.2	6.31	8.55	2.69	1.24	0.79	2.74	100.29
WL16	Liu et al., 2020	Yes	119	124.25	40.2		46.16	3.27	15.17	12.132	0.12	6.33	8.03	3	1.3	0.83	2.73	100.41
WL15	Liu et al., 2020	Yes	119	124.25	40.2		45.83	3.35	15.26	12.375	0.16	6.24	8.25	2.94	1.11	0.82	2.55	100.26
WL14	Liu et al., 2020	Yes	119	124.25	40.2		46.26	3.41	15.34	12.438	0.16	5.61	8.23	3.09	1.37	0.89	2.03	100.18
WL13	Liu et al., 2020	Yes	119	124.25	40.2	3.3	45.71	3.42	14.95	12.06	0.15	6.49	8.55	2.76	1.22	0.78	2.5	99.92
WL12	Liu et al., 2020	Yes	119	124.25	40.2		45.56	1.86	15.01	10.701	0.15	7.48	8.97	3.05	1.24	0.41	4.01	99.62
WL11	Liu et al., 2020	Yes	119	124.25	40.2	3.9	44.93	3.28	14.93	12.375	0.22	6.25	8.5	2.83	1.17	0.81	3.29	99.97
WL10	Liu et al., 2020	Yes	126	124.25	40.2	-19.9	60.42	0.78	17.15	5.139	0.07	3.22	5.46	3.37	2.47	0.19	0.8	99.64
WL1	Liu et al., 2020	Yes	126	124.25	40.2		57.26	0.86	16.32	5.895	0.1	5.17	5.46	3.47	2.5	0.28	1.33	99.29
SGL9	Liu et al., 2020	Yes	126	124.25	40.2	-17.3	56.75	0.56	15.2	5.868	0.11	7.28	6.51	3.28	1.91	0.12	1.11	99.35
SGL8	Liu et al., 2020	Yes	118	124.25	40.2	-8.2	53.87	0.86	18.16	6.624	0.12	2.68	4.63	5.55	1.58	0.44	4.27	99.52
SGL39	Liu et al., 2020	Yes	118	124.25	40.2	-5.1	48.77	1.05	14.9	7.812	0.15	8.75	7.84	2.89	1.47	0.4	4.75	99.65
SGL37	Liu et al., 2020	Yes	126	124.25	40.2	-14.5	58.03	0.87	17.62	6.111	0.13	3.04	6.15	3.78	2.51	0.29	0.73	99.94
SGL29	Liu et al., 2020	Yes	118	124.25	40.2	-12.2	51.63	0.95	17.22	7.398	0.13	4.62	7.43	3.75	1.32	0.35	3.72	99.34
SGL28	Liu et al., 2020	Yes	118	124.25	40.2	-13.6	52.21	1.11	16.55	7.236	0.11	4.38	6.22	3.65	2.65	0.5	4.29	99.71
SGL25	Liu et al., 2020	Yes	119	124.25	40.2	3.1	44.91	2.55	14.46	11.106	0.2	4.87	8.56	2.84	2.76	0.81	4.56	98.86
SGL24	Liu et al., 2020	Yes	118	124.25	40.2	-8.7	54.92	0.85	18.3	6.678	0.13	2.87	3.84	5.58	2.55	0.45	3	99.91
SGL23	Liu et al., 2020	Yes	118	124.25	40.2	-8.4	55.11	0.88	18.48	6.66	0.13	2.69	4.66	4.99	2.29	0.45	2.78	99.86
SGL16	Liu et al., 2020	Yes	118	124.25	40.2	-11.8	53.89	0.71	15.64	6.048	0.11	4.99	5.64	3.76	2.16	0.33	5.25	99.2
JL7-3	Lu et al., 2012	Yes	82.2	125	43		45.6	2.28	15.8	8.91	0.15	7.77	8.64	4	1.12	0.66	3.92	99.5
JL4-2	Lu et al., 2012	Yes	99.3	125	43		45.1	2.34	15.1	9.198	0.15	8.92	8.65	2.95	1.76	0.58	3.98	99.5
JL2-3	Lu et al., 2012	Yes	82.5	125	43		45.9	2.26	16	7.947	0.14	6.61	7.15	4.37	2.35	0.72	5.36	99.4
JL1-14	Lu et al., 2012	Yes	91.7	125	43		45.4	2.37	15.7	8.928	0.16	7.82	8.76	3.68	0.82	0.6	4.52	99.4
YYB16-23	Ma and Xu, 2004	Yes	30	114.15	40.1		47.052	2.72442	14.9728	11.2099	0.151991	5.72307	7.40559	5.20808	1.71765	1.02642	2.17278	99.3647
YYB16-10	Ma and Xu, 2004	Yes	30	114.15	40.1		46.6955	2.65401	14.6347	12.0726	0.192077	6.72352	8.62211	3.93177	1.94242	0.927799	2.45594	100.853
YYB16-09	Ma and Xu, 2004	Yes	30	114.15	40.1		46.7276	3.03093	14.9843	12.3072	0.157192	5.64316	7.83364	3.26816	1.76865	1.1019	3.04198	99.8647
YYB11-28	Ma and Xu, 2004	Yes	30	114.15	40.1		41.8052	2.85799	10.7993	13.5817	0.206357	11.5725	10.1774	4.0225	1.23523	1.14998	2.42708	99.8351
YYB11-26	Ma and Xu, 2004	Yes	30	114.15	40.1		47.6647	2.67276	14.938	11.8621	0.152956	6.50162	7.39155	4.87672	1.47295	1.0409	1.17466	99.7489
YYB11-23	Ma and Xu, 2004	Yes	30	114.15	40.1		47.7379	2.72811	15.159	11.6401	0.14932	6.16145	7.56081	4.52196	1.49824	1.07046	1.50471	99.732
YYB11-08	Ma and Xu, 2004	Yes	30	114.15	40.1		47.3215	2.88068	15.0572	12.1857	0.143449	5.9946	7.41542	3.3969	1.74578	1.02854	2.65367	99.8235
YYB11-05	Ma and Xu, 2004	Yes	30	114.15	40.1		46.5313	3.07532	14.9036	12.5761	0.144078	6.55307	7.6103	2.92727	1.45469	1.04134	2.96777	99.7849
YYB11-04	Ma and Xu, 2004	Yes	30	114.15	40.1		46.6772	2.87513	14.9402	11.8908	0.14805	6.27139	7.38078	3.42785	1.57032	1.04128	3.59503	99.818
YYB11-02	Ma and Xu, 2004	Yes	30	114.15	40.1		46.8494	2.86866	14.8966	12.004	0.148738	6.29062	7.28022	3.9237	1.5439	1.01241	2.97082	99.7891
YYB11-01	Ma and Xu, 2004	Yes	30	114.15	40.1		45.4325	2.43353	14.3386	11.2567	0.161907	7.579	7.91466	4.96382	2.22424	1.42458	2.04697	99.7766
JJLT-07	Ma et al., 2014a	Yes	121.6	119.94	37.18	-14.77	48.95	0.82	13.03	7.506	0.16	10.7	7.73	1.67	3.1	0.39	5.58	99.99
JJLT-06	Ma et al., 2014a	Yes	120.8	119.94	37.18	-13.92	48.61	0.77	13.04	8.037	0.16	11.11	8.29	1.09	3.09	0.32	4.92	99.8
JJLT-05	Ma et al., 2014a	Yes	120.8	119.94	37.18	-14.27	47.87	0.71	11.8	8.224	0.15	13.1	8.15	1	3.01	0.3	5.17	99.86
JJLT-04	Ma et al., 2014a	Yes	120.8	119.94	37.18	-14.56	47.56	0.97	14.41	9.612	0.3	9.26	8.34	1.65	3.13	0.36	3.87	99.9
JJLT-03	Ma et al., 2014a	Yes	120.8	119.94	37.18	-15.52	50.84	0.62	13.21	7.053	0.16	8.98	7.7	1.51	3.55	0.37	5.54	99.81
JJLT-02	Ma et al., 2014a	Yes	120.8	119.94	37.18	-14.23	49.96	0.82	13.13	7.246	0.15	10.45	7.89	1.68	3.09	0.45	4.57	99.73
JJLT-01	Ma et al., 2014a	Yes	120.8	119.94	37.18	-14.93	51.17	0.79	12.4	7.634	0.14	11.59	7.35	1.57	3.23	0.41	3.13	99.77
JJHT-10	Ma et al., 2014a	Yes	121.6	119.94	37.18		45.41	2.19	14.74	9.909	0.19	7.58	8.1	3.76	2.52	0.85	4.11	99.66
JJHT-09	Ma et al., 2014a	Yes	121.6	119.94	37.18	1.46	45.22	2.23	15.19	9.943	0.19	6.22	7.68	4.03	2.69	1.12	4.93	99.82
JJHT-08	Ma et al., 2014a	Yes	121.6	119.94	37.18	0.41	46.03	2.35	15.4	10.458	0.2	7.53	8.16	4.04	2.75	0.72	2.16	100.21
JJHT-07	Ma et al., 2014a	Yes	121.6	119.94	37.18	-0.79	46.97	1.97	14.95	9.497	0.18	5.94	9.25	2.4	2.89	0.95	4.65	100.11
JJHT-06	Ma et al., 2014a	Yes	121.6	119.94	37.18	0.92	45.91	2.32	15.18	10.844	0.21	6.25	7.82	3.48	3.29	1.02	3.1	99.98
JJHT-05	Ma et al., 2014a	Yes	121.6	119.94	37.18	0.24	46.43	2.26	15.96	10.123	0.2	6.65	8.33	3.74	2.84	0.89	2.19	100.04
JJHT-04	Ma et al., 2014a	Yes	121.6	119.94	37.18	0.14	47.06	2.07	15.84	9.536	0.15	6.03	8.04	3.19	2.89	1	3.61	99.89
JJHT-03	Ma et al., 2014a	Yes	121.6	119.94	37.18		45.98	2.22	14.07	10.914	0.21	6.59	7.07	3.55	3.1	0.91	4.78	99.89
JJHT-02	Ma et al., 2014a	Yes	121.6	119.94	37.18	1.76	46.36	2.16	14.29	10.629	0.2	6.65	7.11	3.79	2.84	0.84	4.58	99.89
JJHT-01	Ma et al., 2014a	Yes	121.6	119.94	37.18	0.92	46.57	2.1	16.48	8.822	0.14	5.33	8.17	4.03	2.85	0.96	3.83	99.67
PL-07	Ma et al., 2014b	Yes	126	120.55	37.18		47.52	0.9	13.27	11.043	0.09	9.32	5.17	1.3	2.05	0.3	8.58	99.99
PL-06	Ma et al., 2014b	Yes	126	120.55	37.18	-14.8	46.9	0.93	16.38	7.486	0.13	7.29	7.24	1.44	3.49	0.58	7.83	99.91
PL-05	Ma et al., 2014b	Yes	126	120.55	37.18	-16.2	50.02	0.72	13.06	7.136	0.11	9.11	5.63	2.29	2.78	0.27	7.24	98.56
PL-04	Ma et al., 2014b	Yes	126	120.55	37.18	-13.1	46.43	0.89	12.91	9.106	0.15	9.83	10.75	2.02	2.06	0.3	5	99.87
PL-03	Ma et al., 2014b	Yes	126	120.55	37.18		46.88	0.9	12.99	9.011	0.14	9.12	9.1	1.34	3.14	0.32	6.49	99.84
PL-02	Ma et al., 2014b	Yes	126	120.55	37.18	-14.9	49.86	0.78	13.33	7.633	0.1	9.24	6.52	1.98	2.26	0.27	6.35	98.62
PL-01	Ma et al., 2014b	Yes	126	120.55	37.18	-18.2	52.52	0.7	16.33	7.978	0.08	7.17	4.35	1.24	3.54	0.23	4.62	98.89
LL-11	Ma et al., 2014b	Yes	126	120.48	37.42		49.61	0.83	14.08	7.336	0.11	6.83	7.19	2.45	3.31	0.47	7.35	99.78
LL-10	Ma et al., 2014b	Yes	126	120.48	37.42		51.17	0.68	13.76	7.275	0.1	7.16	7.07	2.41	2.62	0.28	7	99.75
LL-09	Ma et al., 2014b	Yes	126	120.48	37.42		47.91	0.74	12.95	8.33	0.12	9.48	8.45	2.2	2.18	0.34	6.97	99.95
LL-08	Ma et al., 2014b	Yes	126	120.48	37.42	-16.5	49.59	0.61	13.1	7.206	0.11	7.44	9.42	2.76	2.24	0.29	6.86	99.89
LL-07	Ma et al., 2014b	Yes	126	120.48	37.42	-16.7	50.96	0.66	13.56	7.46	0.11	7.2	7.55	2.26	2.99	0.22	6.43	99.67
LL-06	Ma et al., 2014b	Yes	126	120.48	37.42	-16.2	48.12	0.76	12.82	8.331	0.14	8.98	9.27	2.44	2.2	0.41	6.17	99.96
LL-05	Ma et al., 2014b	Yes	126	120.48	37.42		48.28	0.74	12.58	8.036	0.12	10.71	8.45	2.14	2.34	0.31	5.89	99.88
LL-04	Ma et al., 2014b	Yes	126	120.48	37.42	-13	47.12	0.8	12.92	7.922	0.13	11.33	9.05	2.1	2.28	0.3	5.61	99.93
LL-03	Ma et al., 2014b	Yes	126	120.48	37.42	-15.1	49.28	0.79	13.2	7.982	0.12	9.89	9.02	2.3	1.94	0.04	5.03	99.85
LL-02	Ma et al., 2014b	Yes	126	120.48	37.42		48.89	0.79	14.35	8.838	0.14	7.85	8.04	2.05	2.42	0.35	4.96	98.87
LL-01	Ma et al., 2014b	Yes	126	120.48	37.42	-16.8	53.19	0.65	14.52	7.313	0.11	8.44	7.13	3.24	2.5	0.06	2.59	99.91
LM-5	Ma et al., 2016	Yes	122	120.14	37.41	1.26	44.69	2.09	15.49	9.641	0.18	5.97	8.96	4.62	3.04	1.01	4.08	100.2
LM-4	Ma et al., 2016	Yes	122	120.14	37.41	2.55	47.12	2.37	16.05	10.053	0.3	4.96	7.68	3.62	2.78	0.94	3.57	99.8
LM-3	Ma et al., 2016	Yes	122	120.14	37.41	0.16	50.07	1.83	13.03	8.576	0.24	7.61	7.94	3.3	2.22	0.89	3.72	99.8
LM-2	Ma et al., 2016	Yes	122	120.14	37.41		45.67	1.93	16.54	10.043	0.21	7.64	7.04	3.09	2.54	0.74	4.23	100.1
LM-1	Ma et al., 2016	Yes	122	120.14	37.41	-0.21	46.35	1.76	15.6	9.427	0.17	6.7	8.2	3.1	2.51	0.7	4.87	99.7
DP-9	Ma et al., 2016	Yes	122	120.14	37.41		47.34	2.36	15.77	10.701	0.19	4.86	8.43	3.75	1.32	0.44	4.28	99.9
DP-8	Ma et al., 2016	Yes	122	120.14	37.41		48.47	2.61	15.98	10.979	0.22	4.38	8.82	3.62	1.69	0.67	2.16	100.2
DP-7	Ma et al., 2016	Yes	122	120.14	37.41	2.84	48.23	2.51	16.14	11	0.2	3.86	9.18	3.12	1.6	0.52	3.25	100.1
DP-6	Ma et al., 2016	Yes	122	120.14	37.41	3.21	47.74	2.49	16.03	11.001	0.17	5.18	8.06	3.69	1.6	0.51	2.94	99.9
DP-4	Ma et al., 2016	Yes	122	120.14	37.41	2.8	48.27	2.73	16.92	11.692	0.18	3.92	7.64	4.07	1.91	0.64	1.82	100.2
DP-3	Ma et al., 2016	Yes	122	120.14	37.41	2.69	49.21	2.19	14.45	10.523	0.18	7.37	7.85	3.06	1.1	0.52	3.06	100.1
DP-2	Ma et al., 2016	Yes	122	120.14	37.41	4.33	47.47	2.2	15.36	11.944	0.18	5.97	8.71	3.21	1.01	0.45	2.78	99.9
DP-10	Ma et al., 2016	Yes	122	120.14	37.41		47.84	2.34	16.52	10.415	0.17	4.68	8.48	3.16	1.43	0.51	3.82	99.7
DP-1	Ma et al., 2016	Yes	122	120.14	37.41	2.97	48.5	2.21	14.87	10.597	0.21	6.81	9.09	3.25	1.1	0.54	2.28	99.9
FS-6	Pang et al., 2015	Yes	110	124.75	41.7		54.34	1.01	16.38	7.416	0.09	3.67	5.78	5.39	1.6	0.63	2.62	99.77
FS-53	Pang et al., 2015	Yes	110	124.75	41.7	-14.9	62.01	0.66	17.3	4.446	0.06	1.22	1.84	6.41	3.42	0.34	1.65	99.84
FS-52	Pang et al., 2015	Yes	110	124.75	41.7		52.22	1.3	14.94	8.496	0.12	5.11	6.54	4.05	2.99	0.88	2.07	99.67
FS-50	Pang et al., 2015	Yes	110.4	124.75	41.7	-16	52.93	1.21	15.77	9.144	0.14	4.34	6.93	2.09	4.06	0.8	1.37	99.81
FS-5	Pang et al., 2015	Yes	110.5	124.75	41.7	-13.1	50.91	1.17	15.05	9.387	0.13	6.6	7.86	3.53	1.82	0.58	1.57	99.63
FS-49	Pang et al., 2015	Yes	110	124.75	41.7		53.87	1.21	15.42	8.244	0.11	4.67	5.11	5.74	1.79	0.83	1.84	99.73
FS-48	Pang et al., 2015	Yes	110	124.75	41.7	-8.7	45.42	1.3	14.77	11.637	0.16	9.17	9.98	1.94	0.55	0.38	3.07	99.67
FS-46	Pang et al., 2015	Yes	110	124.75	41.7	-14.3	61.18	0.71	17.21	4.914	0.07	1.94	3.01	5.54	2.5	0.39	1.86	99.86
FS-33	Pang et al., 2015	Yes	110	124.75	41.7		52.24	1.52	16.18	9.351	0.11	2.96	7.61	3.55	1.66	0.58	2.94	99.74
FS-29	Pang et al., 2015	Yes	110	124.75	41.7		57.76	0.81	16.25	6.273	0.08	3.22	4.1	5.2	3.05	0.6	1.74	99.77
FS-28	Pang et al., 2015	Yes	110	124.75	41.7	-15.4	58.24	0.81	16.39	6.381	0.07	3.14	3.57	5.52	2.73	0.59	1.61	99.76
FS-24	Pang et al., 2015	Yes	110	124.75	41.7	-10.4	48.55	1.24	14.95	9.027	0.13	8.88	8.44	2.85	1.46	0.67	2.44	99.64
FS-23	Pang et al., 2015	Yes	110	124.75	41.7	-13.6	57.17	0.89	15.14	6.705	0.11	4.98	6.37	3.45	1.94	0.5	1.7	99.7
FS-22	Pang et al., 2015	Yes	110	124.75	41.7		51.67	1.21	16.9	8.676	0.11	4.03	7.11	3.26	2.81	0.6	2.34	99.69
FS-18	Pang et al., 2015	Yes	110	124.75	41.7	-13	51.95	1.32	15.89	8.946	0.1	4.51	7.5	3.01	2.9	0.89	1.66	99.67
FS-16	Pang et al., 2015	Yes	110	124.75	41.7	-14.4	55.61	0.86	15.41	7.011	0.09	5.47	5.3	5.62	0.99	0.39	2.29	99.83
FS-15	Pang et al., 2015	Yes	110	124.75	41.7		54.94	0.85	15.49	6.948	0.09	5.51	5.54	4.77	1.77	0.38	2.81	99.86
TH4-3	Pei et al., 2011	Yes	137	125.96	41.73	-7.2	48.1	1	15.3	9.81	0.15	7.2	10	2.7	0.65	0.28	3.78	100.1
TH4-2	Pei et al., 2011	Yes	137	125.96	41.73	-7.2	48.4	0.95	16.7	9.27	0.14	6.8	10.1	2.66	0.61	0.19	3.44	100.3
TH38-1	Pei et al., 2011	Yes	134	125.96	41.73	-9.1	49.8	0.92	16.5	9.18	0.14	8.2	10.4	2.39	0.63	0.1	0.59	99.9
TH20-1	Pei et al., 2011	Yes	134	125.96	41.73	-6.6	46.7	0.73	7.4	11.97	0.19	20.9	8.4	1.18	0.37	0.09	0.34	99.5
DD6-3	Pei et al., 2011	Yes	132	125.96	41.73	-14.2	48.2	0.22	17.1	6.21	0.11	11.1	14.4	0.59	0.13	0.02	0.85	99.6
DD6-1	Pei et al., 2011	Yes	132	125.96	41.73	-20	47.9	0.18	20.4	5.04	0.08	9.2	14.6	0.81	0.15	0.02	0.58	99.5
DD3-3	Pei et al., 2011	Yes	132	125.96	41.73	-10.2	49.2	0.74	15	7.83	0.13	10.1	7.9	2.65	1.36	0.26	3.67	99.7
DD3-1	Pei et al., 2011	Yes	132	125.96	41.73	-10.2	49.7	0.78	15.8	7.74	0.12	8.8	7.8	2.76	1.15	0.29	3.94	99.6
250-2	Pei et al., 2011	Yes	134	125.96	41.73	-5.4	46.7	1.1	11.4	11.97	0.16	14.6	9.3	1.56	0.45	0.11	0.48	98.7
Z-9	Qian et al., 2015	Yes	18	114.5	41.03		46.67	2.22	14.19	11.313	0.15	7.66	8.08	3.84	1.87	0.68	1.78	99.71
Z-8	Qian et al., 2015	Yes	18	114.5	41.03		43.78	2.65	13.36	12.393	0.17	6.92	8.94	4.3	1.96	1.32	2.63	99.8
Z-7	Qian et al., 2015	Yes	18	114.5	41.03		47.13	2.46	14.81	11.376	0.14	5.42	6.88	4.42	2.86	0.83	2.17	99.76
Z-6	Qian et al., 2015	Yes	18	114.5	41.03		46.12	2.25	13.93	11.403	0.15	7.89	8.39	3.23	2.01	0.66	2.38	99.7
Z-5	Qian et al., 2015	Yes	18	114.5	41.03		46.91	2.41	14.71	11.277	0.14	5.3	7.28	3.95	3.18	0.83	2.51	99.75
Z-4	Qian et al., 2015	Yes	18	114.5	41.03		46.02	2.41	14.04	11.628	0.15	8.14	8	3.55	1.38	0.68	2.44	99.73
Z-3	Qian et al., 2015	Yes	18	114.5	41.03		46.72	2.41	14.61	11.214	0.13	5.42	7.28	3.76	3.1	0.83	3.04	99.76
Z-2	Qian et al., 2015	Yes	18	114.5	41.03		46.87	2.43	14.73	11.313	0.14	5.68	6.93	4.26	2.77	0.83	2.56	99.76
Z-12	Qian et al., 2015	Yes	18	114.5	41.03		45.02	2.42	13.47	12.276	0.18	8.81	9.06	3	1.92	0.84	1.38	99.75
Z-11	Qian et al., 2015	Yes	18	114.5	41.03		45.65	2.42	13.27	11.808	0.17	9.85	9.22	2.54	1.65	0.69	1.23	99.83
Z-10	Qian et al., 2015	Yes	18	114.5	41.03		45.56	2.44	13.48	11.808	0.15	9.19	8.3	2.98	1.54	0.57	2.35	99.69
Z-1	Qian et al., 2015	Yes	18	114.5	41.03		44.69	2.57	13.67	12.033	0.16	6.31	8.68	4.49	2.36	1.3	2.17	99.78
D-9	Qian et al., 2015	Yes	18	114.5	41.03		44.34	2.44	13.27	11.925	0.17	9.14	9.11	3.65	1.65	0.8	1.89	99.72
D-8	Qian et al., 2015	Yes	18	114.5	41.03		44.13	2.37	12.98	11.835	0.17	10.23	8.95	2.92	1.8	0.68	2.32	99.68
D-7	Qian et al., 2015	Yes	18	114.5	41.03		43.94	2.51	13.18	11.97	0.16	9.11	8.97	3.33	1.68	0.84	2.73	99.75
D-6	Qian et al., 2015	Yes	18	114.5	41.03		50.16	1.92	14.22	10.836	0.14	7.23	8.37	3.23	1.18	0.4	0.75	99.64
D-5	Qian et al., 2015	Yes	18	114.5	41.03		44.39	2.45	13.33	11.952	0.17	9.18	9.36	3.4	1.49	0.81	1.86	99.7
D-4	Qian et al., 2015	Yes	18	114.5	41.03		49.76	1.83	14.34	10.152	0.13	7.66	8.07	2.94	1.11	0.36	2.18	99.67
D-3	Qian et al., 2015	Yes	18	114.5	41.03		44.44	2.62	13.38	12.087	0.16	9.2	8.62	3.61	1.37	0.85	2.05	99.72
D-21	Qian et al., 2015	Yes	18	114.5	41.03		51.06	1.87	14.5	10.44	0.14	6.85	8.4	3.14	1.17	0.37	0.62	99.72
D-20	Qian et al., 2015	Yes	18	114.5	41.03		49.8	1.88	14.14	10.377	0.14	7.56	8.18	3.11	1.17	0.37	1.78	99.66
D-2	Qian et al., 2015	Yes	18	114.5	41.03		44.46	2.38	13.05	11.934	0.17	10.16	9.44	2.78	1.43	0.67	1.85	99.65
D-19	Qian et al., 2015	Yes	18	114.5	41.03		50.51	1.94	14.18	10.818	0.15	6.95	8.9	3	0.81	0.31	0.86	99.63
D-18	Qian et al., 2015	Yes	18	114.5	41.03		50.28	1.91	14.18	10.629	0.15	6.96	9.02	2.99	0.69	0.3	1.34	99.64
D-17	Qian et al., 2015	Yes	18	114.5	41.03		43.88	2.37	12.4	12.231	0.17	10.76	9.64	2.38	1.7	0.63	2.13	99.64
D-16	Qian et al., 2015	Yes	18	114.5	41.03		44.23	2.39	13.04	11.88	0.17	9.95	9.44	2.89	1.51	0.68	2.17	99.67
D-15	Qian et al., 2015	Yes	18	114.5	41.03		44.34	2.46	13.2	11.997	0.17	9.13	9.11	3.78	1.59	0.8	1.8	99.72
D-14	Qian et al., 2015	Yes	18	114.5	41.03		44.47	2.53	13.14	12.114	0.17	9.09	9.21	3.48	1.77	0.81	1.55	99.69
D-13	Qian et al., 2015	Yes	18	114.5	41.03		44.21	2.51	13.29	11.907	0.16	8.99	8.96	3.08	2.11	0.83	2.33	99.69
D-12	Qian et al., 2015	Yes	18	114.5	41.03		44.4	2.78	13.18	12.033	0.15	8.16	8.61	3.6	2.11	0.87	2.53	99.74
D-11	Qian et al., 2015	Yes	18	114.5	41.03		44.13	2.55	13.19	11.988	0.16	8.83	8.8	3.52	2.17	0.84	2.2	99.71
D-10	Qian et al., 2015	Yes	18	114.5	41.03		49.23	1.82	14.1	10.179	0.14	8.21	8.05	2.93	1.11	0.38	2.41	99.68
D-1	Qian et al., 2015	Yes	18	114.5	41.03		49	1.98	14.07	11.268	0.14	6	8.71	3.2	0.98	0.36	2.77	99.72
H-X	Qian et al., 2017	Yes	124	117.98	35.27		49.7	1.06	11.76	7.902	0.13	12.94	8.69	1.67	3.44	0.68	0.99	99.81
H-9	Qian et al., 2017	Yes	124	117.98	35.27		48.94	1.1	11.54	8.055	0.13	13.34	9.15	2.39	2.13	0.72	1.42	99.8
H-8	Qian et al., 2017	Yes	124	117.98	35.27		49.05	1.09	11.66	8.037	0.13	13.26	8.88	2.37	2.24	0.71	1.51	99.82
H-7	Qian et al., 2017	Yes	124	117.98	35.27		48.95	1.11	11.6	8.064	0.13	13.27	9.04	2.25	2.32	0.72	1.45	99.81
H-6	Qian et al., 2017	Yes	124	117.98	35.27		49.06	1.08	11.56	8.001	0.13	13.44	8.91	1.89	2.67	0.7	1.46	99.81
H-5	Qian et al., 2017	Yes	124	117.98	35.27		48.61	1.09	11.35	7.992	0.13	13.42	8.97	2.97	2.43	0.7	1.25	99.81
H-4	Qian et al., 2017	Yes	124	117.98	35.27		49.72	1.1	12.04	8.073	0.13	12.27	9.01	2.84	1.81	0.71	1.24	99.86
H-3	Qian et al., 2017	Yes	124	117.98	35.27		49.55	1.07	11.82	7.947	0.13	12.95	8.87	1.97	2.89	0.68	1.07	99.82
H-2	Qian et al., 2017	Yes	124	117.98	35.27		49.47	1.09	11.75	7.965	0.13	13.08	8.98	2.34	2.15	0.7	1.29	99.83
H-17	Qian et al., 2017	Yes	124	117.98	35.27		49.04	1.1	11.52	8.037	0.13	13.25	9.03	2.41	2.11	0.71	1.56	99.81
H-16	Qian et al., 2017	Yes	124	117.98	35.27		49.29	1.08	11.62	8.046	0.13	13.16	8.82	2.36	2.21	0.68	1.51	99.81
H-15	Qian et al., 2017	Yes	124	117.98	35.27		49.02	1.09	11.53	7.947	0.13	13.35	8.93	1.86	2.84	0.71	1.53	99.8
H-14	Qian et al., 2017	Yes	124	117.98	35.27		49.54	1.07	11.55	7.947	0.13	13.07	8.92	2.3	2.34	0.68	1.38	99.81
H-13	Qian et al., 2017	Yes	124	117.98	35.27		49.3	1.08	11.53	7.956	0.13	13.17	9.05	2.54	1.94	0.7	1.52	99.8
H-12	Qian et al., 2017	Yes	124	117.98	35.27		49.78	1.07	11.8	7.947	0.13	12.91	8.85	2.35	2.42	0.68	1.02	99.82
H-1	Qian et al., 2017	Yes	124	117.98	35.27		49.64	1.1	12.05	8.064	0.13	12.29	9.04	2.52	2.27	0.71	1.15	99.85
F-7	Qian et al., 2017	Yes	124	117.98	35.27		49.57	1.13	12.86	7.713	0.13	10.92	10.07	2.76	0.95	0.71	1.96	99.62
F-6	Qian et al., 2017	Yes	124	117.98	35.27		48.75	1.12	12.28	8.046	0.14	11.42	10.66	3.07	0.76	0.7	1.92	99.77
F-5	Qian et al., 2017	Yes	124	117.98	35.27	-12.4	49.56	1.15	14.48	7.974	0.14	8.89	8.17	3.69	1.71	0.9	1.96	99.52
F-4	Qian et al., 2017	Yes	124	117.98	35.27	-13.4	48.48	1.13	12.61	7.983	0.14	11.64	10.41	2.8	1.05	0.73	1.87	99.73
F-3-3	Qian et al., 2017	Yes	124	117.98	35.27		49.79	1.11	13.7	8.073	0.13	10.09	8.97	2.54	1.63	0.77	1.91	99.61
F-3-1	Qian et al., 2017	Yes	124	117.98	35.27	-13.3	49.63	1.05	13.72	8.163	0.15	9.87	9.05	2.75	1.71	0.8	1.89	99.69
F-2-3	Qian et al., 2017	Yes	124	117.98	35.27		48.64	1.11	12.39	8.712	0.18	11.87	10.05	2.8	0.88	0.72	1.76	100.07
F-2-2	Qian et al., 2017	Yes	124	117.98	35.27		48.85	1.13	12.75	8.055	0.14	11.14	10.02	2.85	0.94	0.73	1.95	99.45
F-2-1	Qian et al., 2017	Yes	124	117.98	35.27	-12.5	48.62	1.12	12.7	8.37	0.17	11.34	10.02	2.92	0.87	0.74	1.69	99.5
F-1	Qian et al., 2017	Yes	124	117.98	35.27	-12.3	49.87	1.13	14.4	8.082	0.16	9.03	8.66	2.97	1.81	0.89	2.01	99.91
SD1508-2	Sakuyama et al., 2013	Yes	12.15	118.9	36.5		41.94	2.75	12.86	11.736	0.19	10.87	9.96	3.91	1.93	0.87	1.284	98.3
SD1508	Sakuyama et al., 2013	Yes	12.15	118.9	36.5		41.89	2.74	12.79	11.709	0.18	10.83	9.85	3.95	1.92	0.87	1.291	98.02
SD1407	Sakuyama et al., 2013	Yes	12.15	118.9	36.6		44.29	2.75	13.77	11.916	0.17	8.43	9.62	4.08	0.66	0.66	1.314	97.66
SD1406	Sakuyama et al., 2013	Yes	12.15	118.9	36.6		44.98	2.57	14.17	11.223	0.16	7.71	8.52	5.42	1.13	0.94	1.247	98.07
SD1405	Sakuyama et al., 2013	Yes	12.15	118.9	36.6		42.79	3.17	13.64	12.051	0.16	8.68	9.79	4.56	0.7	0.69	1.349	97.58
SD1304	Sakuyama et al., 2013	Yes	12.15	117.75	38.05		39.69	2.71	9.58	13.239	0.21	13.94	9.68	4.63	2.14	1.12	1.451	98.39
SD1303	Sakuyama et al., 2013	Yes	12.15	117.75	38.05		40.53	2.88	10.66	13.221	0.2	12.01	10.03	4.64	2.44	1.11	1.459	99.18
SD1302	Sakuyama et al., 2013	Yes	12.15	117.75	38.05		39.74	2.69	9.65	13.194	0.2	13.86	9.56	4.65	2.18	1.1	1.476	98.3
SD1301	Sakuyama et al., 2013	Yes	12.15	117.75	38.05		40.21	2.91	10.65	13.32	0.2	11.34	10.02	4.88	2.51	1.13	1.49	98.66
DMPI11-08	Sun et al., 2020	Yes	27	114.74	40.77		44.1398	2.76741	13.5401	12.3117	0.159226	8.88442	8.90982	3.38184	1.84819	0.871347	3.02063	99.8344
DMPI11-07	Sun et al., 2020	Yes	27	114.74	40.77		44.4164	2.76305	13.252	12.4435	0.16077	9.19784	8.99712	3.06362	2.15691	0.846788	2.46464	99.7627
DMPI11-02	Sun et al., 2020	Yes	27	114.74	40.77		44.3614	2.72882	13.7103	12.284	0.159717	8.76593	8.92564	3.51377	1.84161	0.894025	2.64321	99.8284
DMPI11-01	Sun et al., 2020	Yes	27	114.74	40.77		44.8967	2.67247	13.7479	12.0225	0.156621	8.3237	8.07985	3.66275	2.13421	0.99028	3.10597	99.793
DMP16-19	Sun et al., 2020	Yes	27	114.74	40.77		43.1855	2.91213	13.3588	12.1661	0.155428	8.08969	8.87475	3.44873	1.89418	0.899603	3.7846	98.7695
DMP16-16	Sun et al., 2020	Yes	27	114.74	40.77		43.0446	2.88845	13.6159	11.5697	0.152536	7.70488	8.87322	3.41915	2.16285	0.849266	3.54081	97.8214
DMP16-13	Sun et al., 2020	Yes	27	114.74	40.77		44.1022	2.94059	14.062	12.067	0.159782	7.69217	8.8565	4.03706	1.99101	0.872138	3.05819	99.8387
DMP16-10	Sun et al., 2020	Yes	27	114.74	40.77		44.1137	2.84439	13.8797	11.7682	0.156084	7.52494	8.8033	3.66116	2.18078	0.866117	3.36305	99.1614
DMP16-09	Sun et al., 2020	Yes	27	114.74	40.77		44.269	2.82959	13.9153	11.8686	0.157276	7.78266	8.94469	3.74966	2.16179	0.843102	3.02533	99.5471
DMP16-08	Sun et al., 2020	Yes	27	114.74	40.77		44.3073	2.8888	13.9524	12.0411	0.160979	8.11586	9.15959	3.68441	1.92498	0.824868	3.1968	100.257
DMP16-07	Sun et al., 2020	Yes	27	114.74	40.77		43.0955	2.84657	13.6008	11.785	0.155947	8.05981	9.02656	3.28687	2.08704	0.828044	3.82061	98.5928
DMP16-06	Sun et al., 2020	Yes	27	114.74	40.77		43.7633	2.86725	13.814	11.9419	0.156908	7.70161	8.8222	3.8353	1.89809	0.861876	3.22966	98.892
DMP16-05	Sun et al., 2020	Yes	27	114.74	40.77		44.4104	2.84797	14.1386	11.9002	0.157568	7.50704	8.73225	3.86709	2.16223	0.913705	3.53279	100.17
DMP16-04	Sun et al., 2020	Yes	27	114.74	40.77		44.4618	2.92726	13.9879	12.0131	0.159648	7.88697	8.94903	3.48386	2.23213	0.885995	3.29755	100.285
DMP16-03	Sun et al., 2020	Yes	27	114.74	40.77		43.5059	2.80372	13.5286	11.6999	0.154229	7.38144	8.41507	4.03996	2.16764	0.903748	3.09205	97.6923
DMP16-02	Sun et al., 2020	Yes	27	114.74	40.77		43.6786	2.86742	13.7217	11.8429	0.154395	7.75198	8.82653	3.56931	2.15548	0.873448	3.08645	98.5282
DMP16-01	Sun et al., 2020	Yes	27	114.74	40.77		43.458	2.69226	13.6884	11.4867	0.159644	8.09901	9.18835	3.11088	2.67266	0.818753	3.25361	98.6283
X7	Sun et al., 2021	Yes	1	116.09	43.93		43.7439	3.49309	11.3927	13.1465	0.1867	10.0276	9.49558	3.93474	2.37891	0.913423	0.762858	99.476
X6	Sun et al., 2021	Yes	1	116.09	43.93		44.6467	3.50939	11.4131	13.3125	0.188039	8.4869	9.28129	4.33395	2.52395	1.04578	0.985446	99.727
X5	Sun et al., 2021	Yes	1	116.09	43.93		45.1915	2.76928	11.8497	12.8394	0.181609	9.06037	9.49181	3.62214	2.19736	0.762556	1.58531	99.551
X18	Sun et al., 2021	Yes	1	116.09	43.93		44.5014	3.44658	11.1203	12.6979	0.182466	10.2181	9.2855	3.97371	2.22	0.81096	0.963015	99.42
X1	Sun et al., 2021	Yes	1	116.09	43.93		43.6053	3.42455	10.8561	12.9813	0.181772	10.4745	10.0427	3.85639	2.45041	0.913883	0.964096	99.751
WLQ11-05	Sun et al., 2021	Yes	1	120.76	37.81		43.4809	2.5059	12.6567	11.968	0.184417	9.85003	10.0187	4.3402	1.74358	1.17751	1.84902	99.7749
WLQ11-02	Sun et al., 2021	Yes	1	120.76	37.81		46.4955	2.37715	13.477	12.101	0.170376	9.06746	9.28449	2.73819	2.05466	0.831598	1.12795	99.7253
SWP11-02	Sun et al., 2021	Yes	18.6	118.83	36.71		48.415	2.73712	15.527	6.95357	0.108154	4.70885	9.02668	3.0283	0.824557	1.24423	7.79192	100.365
SWP11-01	Sun et al., 2021	Yes	18.6	118.83	36.71		47.2579	2.44566	14.879	10.1804	0.153821	4.13575	9.56012	2.6643	1.30119	1.11931	6.29892	99.9964
SW11-08	Sun et al., 2021	Yes	18.6	118.83	36.71		43.1113	2.28944	13.7289	11.7354	0.219802	7.17565	8.25424	5.36375	1.75258	1.23322	5.06154	99.9258
SW11-07	Sun et al., 2021	Yes	18.6	118.83	36.71		43.7395	2.43737	13.9115	12.4451	0.219682	7.7654	9.55069	4.26938	1.6004	1.28728	2.54885	99.7752
SW11-06	Sun et al., 2021	Yes	18.6	118.83	36.71		43.343	2.40904	13.8649	11.7443	0.211783	7.54184	9.08021	4.97593	1.20403	1.20109	4.286	99.8622
SW11-05	Sun et al., 2021	Yes	18.6	118.83	36.71		43.9056	2.38533	13.8397	12.1809	0.227079	7.82216	8.49234	5.1997	1.98945	1.27707	2.42758	99.7469
SW11-04	Sun et al., 2021	Yes	18.6	118.83	36.71		43.8994	2.35739	13.8784	11.9254	0.217285	7.79546	8.50585	4.25441	2.65008	1.26005	3.0449	99.7887
SW11-02	Sun et al., 2021	Yes	18.6	118.83	36.71		43.6057	2.36195	13.9032	11.7934	0.203327	7.48262	8.83188	3.91848	2.68076	1.25451	3.78656	99.8224
SS9	Sun et al., 2021	Yes	18.6	118.83	36.71		48.62	1.72	14.11	10.58	0.155	8.39	8.65	3.23	1.29	0.36	3.06	100.165
SS8	Sun et al., 2021	Yes	18.6	118.83	36.71		48.31	1.78	14.22	10.67	0.157	8.28	8.79	3.15	1.28	0.36	2.89	99.887
SS7	Sun et al., 2021	Yes	18.6	118.83	36.71		44.53	2.77	14	12	0.175	9.57	9.29	4.58	0.87	0.55	1.93	100.265
SS6	Sun et al., 2021	Yes	18.6	118.83	36.71		48.06	2.51	13.05	11.01	0.17	8.61	9.67	3.84	0.81	0.52	2.51	100.76
SS5	Sun et al., 2021	Yes	18.6	118.83	36.71		44.35	2.85	13.9	12.13	0.175	9.36	8.85	4.37	0.72	0.57	2.82	100.095
SS4	Sun et al., 2021	Yes	18.6	118.83	36.71	4.13	46.12	2.82	13.87	11.37	0.169	9.25	9.39	4.36	0.72	0.51	2.13	100.709
SS3	Sun et al., 2021	Yes	18.6	118.83	36.71		44.41	2.94	14.45	12.2	0.18	7.91	9.14	4.35	0.64	0.58	3.35	100.15
SS2	Sun et al., 2021	Yes	18.6	118.83	36.71		44.15	2.8	14.81	11.37	0.174	8.94	9.26	3.77	0.56	0.53	3.62	99.984
SS11	Sun et al., 2021	Yes	18.6	118.83	36.71		49.05	1.77	14.4	10.52	0.157	8.23	8.47	3.23	1.33	0.35	2.81	100.317
SS10	Sun et al., 2021	Yes	18.6	118.83	36.71		49.15	1.61	13.51	10.11	0.15	8.57	8.69	2.86	1.16	0.35	4.05	100.21
SS1	Sun et al., 2021	Yes	18.6	118.83	36.71		44.51	2.77	14.34	11.24	0.171	8.99	10	3.8	0.75	0.52	2.81	99.901
SP9	Sun et al., 2021	Yes	1	120.76	37.81		50.32	2.18	13.73	11.45	0.134	7.01	6.47	4.9	1.05	0.47	1.53	99.244
SP8	Sun et al., 2021	Yes	1	120.76	37.81		47.35	3.03	14.73	12.09	0.138	7.75	6.74	4.02	3.02	0.46	0.51	99.838
SP7	Sun et al., 2021	Yes	1	120.76	37.81		49.26	2.17	13.58	11.34	0.159	5.9	7.89	2.85	0.87	0.56	5.64	100.219
SP6	Sun et al., 2021	Yes	1	120.76	37.81		48.17	2.28	13.77	11.79	0.163	6.24	7.98	3.11	0.93	0.56	4.84	99.833
SP5	Sun et al., 2021	Yes	1	120.76	37.81		48.06	3.01	14.8	11.79	0.137	7.5	6.38	3.39	2.27	0.45	2.86	100.647
SP4	Sun et al., 2021	Yes	1	120.76	37.81		47.39	2.97	14.5	11.67	0.137	7.5	6.68	2.89	2.9	0.45	2.82	99.907
SP3	Sun et al., 2021	Yes	1	120.76	37.81		48.13	2.98	14.61	11.56	0.133	7.45	6.43	2.88	2.89	0.46	2.81	100.333
SP2	Sun et al., 2021	Yes	1	120.76	37.81		49.42	2.94	14.29	11.54	0.134	7.27	6.29	2.74	2.8	0.51	2.86	100.794
SP18	Sun et al., 2021	Yes	1	120.76	37.81		47.05	2.98	14.81	11.72	0.133	7.28	7.04	4.12	2	0.65	2.14	99.923
SP17	Sun et al., 2021	Yes	1	120.76	37.81		47.46	3.02	14.61	11.81	0.135	7.19	6.84	4.89	1.18	0.7	1.58	99.415
SP16	Sun et al., 2021	Yes	1	120.76	37.81		47.72	3.02	14.66	12	0.134	7.26	7.04	5.07	1.16	0.51	1.66	100.234
SP15	Sun et al., 2021	Yes	1	120.76	37.81		47.93	2.25	12.81	12.04	0.176	6.79	8.85	4.65	1.67	0.83	2.34	100.336
SP14	Sun et al., 2021	Yes	1	120.76	37.81		45.65	2.41	13.53	12.86	0.178	7	8.64	5.19	1.79	0.84	1.82	99.908
SP-13	Sun et al., 2021	Yes	1	120.76	37.81		46.6644	2.56409	13.5816	14.2534	0.180287	8.01277	9.07446	2.96472	1.89302	0.801277	0	99.99
SP13	Sun et al., 2021	Yes	1	120.76	37.81		50.24	2.19	12.08	11.91	0.175	6.5	8.51	4.66	1.73	0.82	1.96	100.775
SP12	Sun et al., 2021	Yes	1	120.76	37.81		45.78	2.28	12.86	12.28	0.175	7.34	9.04	4.82	1.78	0.84	2.3	99.495
SP11	Sun et al., 2021	Yes	1	120.76	37.81		49.36	2.9	14.07	11.86	0.137	7.61	6.25	3.68	2.97	0.54	1.29	100.667
SP10	Sun et al., 2021	Yes	1	120.76	37.81		49.11	2.95	14.24	11.88	0.136	7.24	6.99	4.89	1.15	0.48	1.54	100.606
SP1	Sun et al., 2021	Yes	1	120.76	37.81		52.56	1.86	11.22	11.04	0.137	6.39	7.05	2.58	2.45	0.55	2.82	98.657
SM1109	Sun et al., 2021	Yes	8	118.96	42.27	2.24	48.9925	2.13667	13.8952	11.2501	0.170275	8.26109	8.19481	3.80059	1.62869	0.455048	0	98.7849
SM1106	Sun et al., 2021	Yes	8	118.96	42.27	4.12	47.2336	2.45338	13.8206	11.1897	0.17657	8.7961	8.43472	3.62374	1.42868	0.423614	0	97.5806
SM1103	Sun et al., 2021	Yes	8	118.96	42.27	4.21	49.6431	2.36926	13.4967	10.9275	0.151876	6.82935	8.42404	3.53364	1.50863	0.425252	0	97.3093
SBL-10	Sun et al., 2021	Yes	1	120.76	37.81		46.7346	2.50796	13.7988	11.9733	0.151082	7.78575	7.88647	3.17272	2.60868	0.835986	2.04464	99.5
SBL-09	Sun et al., 2021	Yes	1	120.76	37.81	5.6	48.1514	3.0183	12.3155	13.1767	0.15142	8.08581	7.21767	3.14953	1.24164	0.444164	2.97792	99.93
SBL-06	Sun et al., 2021	Yes	1	120.76	37.81	4.84	44.0273	2.80082	11.7876	13.1573	0.191423	8.43268	10.0749	3.58666	0.725392	0.936964	3.89898	99.62
SBL-01	Sun et al., 2021	Yes	1	120.76	37.81	5.1	43.8055	2.81966	11.48	12.7858	0.191334	9.19411	9.87888	3.6857	1.61123	1.00702	2.98078	99.44
S-3	Sun et al., 2021	Yes	1	120.76	37.81		45.5257	2.50361	12.6683	13.0045	0.190275	13.0188	9.45364	2.57371	0.510737	0.550795	0	100
KL-1	Sun et al., 2021	Yes	0.27	124.78	40.73		50.5333	1.72216	14.6483	11.2488	0.170213	8.2203	7.77974	3.44431	1.79224	0.440552	0	100
KD-QY-1p	Sun et al., 2021	Yes	0.27	124.78	40.73		49.1768	1.93187	14.7369	10.1477	0.161832	8.20288	7.84887	3.67157	2.19485	0.596757	0	98.67
KD-QY-1o	Sun et al., 2021	Yes	0.27	124.78	40.73		48.8484	1.95151	15.0256	9.88073	0.151672	8.25094	7.88693	3.83224	2.2953	0.606687	0	98.73
KD-QY-1d	Sun et al., 2021	Yes	0.27	124.78	40.73		48.913	1.982	15.1886	9.97251	0.161796	8.11003	7.96846	3.77187	2.24492	0.616847	0	98.93
KD-QY-1b	Sun et al., 2021	Yes	0.27	124.78	40.73		48.4034	1.97255	14.5463	10.167	0.161851	8.32519	7.93068	3.65175	2.11417	0.617055	0	97.89
KD-QY-1a	Sun et al., 2021	Yes	0.27	124.78	40.73		48.621	1.97194	15.1385	9.97278	0.1618	8.29227	8.00912	3.74164	2.16408	0.616864	0	98.69
KD-LJ-1h	Sun et al., 2021	Yes	0.27	124.78	40.73		51.6086	1.80018	15.1296	10.2102	0.161814	7.36254	8.03003	3.81274	1.74962	0.414649	0	100.28
KD-LJ-1e	Sun et al., 2021	Yes	0.27	124.78	40.73		50.4394	1.78045	14.9012	10.2677	0.161859	7.22297	7.97156	3.59125	1.64894	0.414764	0	98.4
KD-LJ-1d	Sun et al., 2021	Yes	0.27	124.78	40.73		50.6435	1.57787	14.9898	10.175	0.151718	8.14221	8.21301	3.4086	1.29466	0.323665	0	98.92
KD-LJ-1b	Sun et al., 2021	Yes	0.27	124.78	40.73		52.0725	1.70746	15.3267	9.27278	0.141446	7.335	8.15337	3.53616	1.91963	0.484959	0	99.95
KD-LJ-1a	Sun et al., 2021	Yes	0.27	124.78	40.73		50.613	1.6379	14.7916	9.74332	0.151657	7.7244	8.18949	3.16458	1.75922	0.434751	0	98.21
KD-LJ-1a	Sun et al., 2021	Yes	0.27	124.78	40.73		52.0867	1.65687	14.9138	9.86108	0.154668	7.77181	8.34702	3.65744	1.84793	0.428622	0	100.726
KD-HY-4d	Sun et al., 2021	Yes	0.27	124.78	40.73		47.112	2.33889	15.2382	10.9873	0.162001	6.9863	6.9053	4.47529	2.7844	0.830257	0	97.82
KD-HY-4a	Sun et al., 2021	Yes	0.27	124.78	40.73	2.91	47.2871	2.32892	14.9861	11.0609	0.162012	7.11838	6.99688	4.43507	2.77445	0.820184	0	97.97
KD-HY-3b	Sun et al., 2021	Yes	0.27	124.78	40.73	2.91	49.1894	1.94248	15.206	10.3323	0.161874	7.53725	7.6283	3.7838	1.90202	0.566558	0	98.25
KD-HY-3a	Sun et al., 2021	Yes	0.27	124.78	40.73	1.35	49.2917	1.9223	14.9939	10.3781	0.161878	8.01294	7.59813	3.68272	1.87171	0.566572	0	98.48
KD-HY-2a	Sun et al., 2021	Yes	0.27	124.78	40.73	1.99	48.3253	2.04391	14.874	10.4156	0.161894	8.22623	7.61913	3.6932	2.05403	0.576747	0	97.99
KD-HY-1d	Sun et al., 2021	Yes	0.27	124.78	40.73	4	48.2851	2.09451	14.8336	10.4702	0.161895	9.90593	7.35609	2.72185	2.10463	0.526158	0	98.46
EP-6	Sun et al., 2021	Yes	1	120.76	37.81		46.4942	2.67534	14.1469	11.9269	0.152008	7.17477	8.01588	2.66521	1.50995	0.912047	3.54685	99.22
EP-5	Sun et al., 2021	Yes	1	120.76	37.81		46.6154	2.63364	13.3201	11.4659	0.151941	7.88066	8.82269	3.72761	2.40066	0.860997	0.81035	98.69
EP-4	Sun et al., 2021	Yes	1	120.76	37.81		46.4174	2.66429	13.2911	11.5491	0.162086	7.77	8.87421	3.67733	2.35025	0.871213	1.01304	98.64
EP-2	Sun et al., 2021	Yes	1	120.76	37.81		46.0575	2.74562	13.4242	11.6141	0.151972	7.34529	8.94606	4.4477	1.46906	0.881435	1.31709	98.4
DMN1108	Sun et al., 2021	Yes	8	118.96	42.27	3.39	50.067	1.9955	12.3613	10.0082	0.16429	9.66009	7.7227	3.14569	1.21441	0.364566	0	96.7037
DMN1107	Sun et al., 2021	Yes	8	118.96	42.27	4.44	49.9745	2.25427	11.9976	9.7137	0.169225	9.46112	7.98805	3.22114	1.33121	0.40995	0	96.5207
DMN1105	Sun et al., 2021	Yes	8	118.96	42.27	4.25	50.5665	2.37233	13.7607	11.1412	0.163582	6.556	7.61439	3.60072	1.50833	0.475534	0	97.7592
DMN1103	Sun et al., 2021	Yes	8	118.96	42.27	3.27	50.3679	2.41064	13.9696	11.3104	0.164064	6.70132	8.22292	3.62453	1.48868	0.431904	0	98.6919
CLFS11-03	Sun et al., 2021	Yes	18.6	118.83	36.71		44.5362	2.88324	13.7566	11.9735	0.160455	9.43615	9.81054	4.08566	1.06475	0.700258	1.34873	99.7561
CLFS11-02	Sun et al., 2021	Yes	18.6	118.83	36.71		44.3295	2.82306	13.6124	12.4364	0.174214	9.15415	9.86982	4.46423	0.796831	0.821577	1.27347	99.7558
CLFS11-01	Sun et al., 2021	Yes	18.6	118.83	36.71		44.4313	2.83478	13.6881	12.1839	0.166228	9.35428	9.82822	4.27146	0.942947	0.783646	1.27104	99.7559
CF14-94	Sun et al., 2021	Yes	1	116.09	43.93	4.19	41.5884	3.56731	12.1329	14.5882	0.191466	9.3012	10.0167	4.60525	2.60998	1.13872	0	99.74
CF14-93	Sun et al., 2021	Yes	1	116.09	43.93	4.42	41.2017	3.57926	12.5676	13.7891	0.180974	8.54598	9.31009	4.56456	2.67439	1.17633	0	97.59
CF14-84	Sun et al., 2021	Yes	1	116.09	43.93	4.33	40.9412	3.64414	12.4827	15.0292	0.191267	9.17075	9.74455	4.57028	2.72807	1.1778	0	99.68
CF14-79	Sun et al., 2021	Yes	1	116.09	43.93	4.76	41.7202	3.04314	12.6145	13.5989	0.190824	11.5097	10.0936	3.69596	2.14928	0.903904	0	99.52
CF14-53	Sun et al., 2021	Yes	1	116.09	43.93	3.9	42.4757	3.5153	12.8021	14.0436	0.181305	9.76024	9.99191	3.83762	2.04472	1.03747	0	99.69
CF14-49	Sun et al., 2021	Yes	1	116.09	43.93	4.43	43.5275	2.8958	13.4936	12.9084	0.180988	8.10423	10.437	3.31811	1.76966	0.864719	0	97.5
CF14-44	Sun et al., 2021	Yes	1	116.09	43.93	4.59	44.3897	2.78381	13.2433	13.8851	0.181553	8.61368	9.49118	4.06477	2.09794	1.05906	0	99.81
CF14-42	Sun et al., 2021	Yes	1	116.09	43.93	4.58	43.4912	3.08998	13.0846	13.956	0.191237	8.88747	9.87385	4.21727	1.75132	1.09709	0	99.64
CF14-40	Sun et al., 2021	Yes	1	116.09	43.93	4.16	46.4922	2.7791	13.9557	12.5243	0.170558	7.33401	10.1532	3.81248	1.66545	0.892923	0	99.78
CF14-37	Sun et al., 2021	Yes	8	118.96	42.27	3.83	47.6084	2.41872	12.8192	14.16	0.181404	8.88878	8.56629	3.06371	1.30006	0.443431	0	99.45
CF14-31	Sun et al., 2021	Yes	8	118.96	42.27	2.94	46.2403	2.68862	13.8157	13.907	0.181256	8.8211	8.6902	3.28274	1.4299	0.463209	0	99.52
CF14-27	Sun et al., 2021	Yes	22.8	118.96	42.27	3.51	49.7053	1.89707	14.2531	12.6063	0.170636	7.49795	9.99727	2.65992	0.441646	0.220823	0	99.45
CF14-26	Sun et al., 2021	Yes	22.8	118.96	42.27	3.76	50.41	1.9373	14.063	12.7122	0.170643	7.38785	9.69655	2.57972	0.501892	0.23087	0	99.69
CF14-24	Sun et al., 2021	Yes	22.8	118.96	42.27	4.06	51.0702	1.52718	14.0762	12.9218	0.170803	7.44502	9.66547	2.24054	0.371749	0.200945	0	99.69
CF14-23	Sun et al., 2021	Yes	22.8	118.96	42.27	3.98	52.541	1.58728	15.3102	11.1944	0.140645	6.64046	9.09171	2.61198	0.301383	0.18083	0	99.6
CF14-20	Sun et al., 2021	Yes	22.8	118.96	42.27	2.94	49.6598	2.1181	14.2545	12.5974	0.170652	7.27782	9.74726	2.64009	0.833185	0.301151	0	99.6
CF14-19	Sun et al., 2021	Yes	22.8	118.96	42.27	3.78	49.7519	2.13739	14.2492	12.8999	0.170589	7.21493	9.65336	2.61905	0.762635	0.291006	0	99.75
CF14-15	Sun et al., 2021	Yes	22.8	118.96	42.27	3.96	49.5051	2.12709	14.1673	12.9014	0.170569	7.35453	9.40136	2.6689	0.842811	0.301004	0	99.44
CF14-02	Sun et al., 2021	Yes	22.8	118.96	42.27	2.78	52.2566	1.88819	14.3121	12.3115	0.160697	6.56848	9.01911	2.59124	0.291263	0.190828	0	99.59
BLO6	Sun et al., 2021	Yes	1	120.76	37.81		43.8449	2.59281	12.7311	11.4919	0.192435	8.03164	10.3004	4.77037	0.840639	1.29641	3.74743	99.84
BC-5-2	Sun et al., 2021	Yes	0.27	124.78	40.73		49.7801	2.05394	15.278	10.4697	0.151769	7.03195	7.69973	3.99657	1.90217	0.516013	0	98.88
BC-4-1	Sun et al., 2021	Yes	0.27	124.78	40.73		50.6688	1.73953	14.968	10.1012	0.161817	7.42334	7.71663	3.8836	1.98225	0.424769	0	99.07
BC-3-1	Sun et al., 2021	Yes	0.27	124.78	40.73		50.3796	1.97269	15.1746	10.3771	0.151746	7.14217	7.66822	3.98586	1.95246	0.485586	0	99.29
BC-2-4	Sun et al., 2021	Yes	0.27	124.78	40.73		51.2881	1.79053	14.8705	10.3767	0.15174	7.41503	7.98153	3.7935	1.55786	0.384408	0	99.61
BC-1-4	Sun et al., 2021	Yes	0.27	124.78	40.73		48.2779	2.21653	14.7769	10.8373	0.172059	8.69406	7.74267	3.927	2.36835	0.607269	0	99.62
B-5	Sun et al., 2021	Yes	0.27	124.78	40.73		48.9951	1.88404	15.874	12.4222	0.220473	6.94489	7.32571	3.84825	1.99428	0.491053	0	100
B-4	Sun et al., 2021	Yes	0.27	124.78	40.73		50.9319	1.90343	15.6382	10.4084	0.170307	7.25308	7.14288	4.05732	2.0537	0.440795	0	100
B-3	Sun et al., 2021	Yes	0.27	124.78	40.73		51.2776	1.97376	15.7099	11.0006	0.170324	6.79293	6.11164	4.49856	2.06393	0.400763	0	100
B-2	Sun et al., 2021	Yes	0.27	124.78	40.73		51.581	1.90336	15.7478	10.1816	0.160283	6.91219	6.38126	4.90866	1.8132	0.390689	0	99.98
B-1	Sun et al., 2021	Yes	0.27	124.78	40.73		48.0916	2.25429	15.0687	11.0306	0.180343	7.6145	7.7748	4.89933	2.50477	0.581106	0	100
AXQJ11-08	Sun et al., 2021	Yes	1	120.76	37.81		46.1884	3.21109	14.5427	12.4127	0.144307	7.86323	8.16396	4.1839	1.17565	0.601449	1.24425	99.7317
AXQJ11-06	Sun et al., 2021	Yes	1	120.76	37.81		46.2349	3.1386	14.7274	12.1761	0.139516	8.35387	8.07785	3.93454	0.856164	0.590181	1.51142	99.7405
AXQJ11-03	Sun et al., 2021	Yes	1	120.76	37.81		46.3599	3.19731	14.4581	12.3999	0.140497	7.94108	8.19598	4.04129	0.889144	0.596108	1.52191	99.7412
AJG11-05	Sun et al., 2021	Yes	18.6	118.83	36.71		47.9368	2.4047	15.9423	10.3483	0.152119	6.42025	9.85351	3.24589	1.95841	0.504714	0.962933	99.7299
AJG11-03	Sun et al., 2021	Yes	18.6	118.83	36.71		47.9625	2.41878	15.9528	10.3687	0.151489	6.37265	9.79833	3.40346	2.00067	0.518093	0.779763	99.7273
AJG11-01	Sun et al., 2021	Yes	18.6	118.83	36.71		47.8294	2.37409	15.9044	10.3584	0.151981	6.49447	9.76952	3.33266	2.00357	0.491704	1.03425	99.7444
14XL28	Sun et al., 2021	Yes	1	116.09	43.93		42.8362	3.55462	11.9391	13.6764	0.210867	10.2622	9.31832	3.88598	2.20909	0.823386	0.93384	99.65
14XL27	Sun et al., 2021	Yes	1	116.09	43.93		45.1025	2.80884	11.3159	13.0291	0.201351	12.0408	8.60774	2.7585	1.99337	0.926213	0.845673	99.63
14XL26	Sun et al., 2021	Yes	1	116.09	43.93		46.0342	3.36171	11.4581	12.5596	0.171619	9.10588	9.6914	2.49352	2.07961	0.868188	1.72628	99.55
14XL24	Sun et al., 2021	Yes	1	116.09	43.93		44.9937	3.48976	12.4663	13.8888	0.211806	9.28922	8.25036	2.69297	2.24918	0.786709	1.31118	99.63
14XL16	Sun et al., 2021	Yes	1	116.09	43.93		44.4316	2.96144	12.2487	12.3177	0.201458	10.8687	9.34766	2.95136	1.96422	0.695031	1.68218	99.67
14XL15	Sun et al., 2021	Yes	1	116.09	43.93		46.8078	3.03999	11.9888	12.4667	0.201324	9.47228	8.56633	3.43257	2.2045	0.785163	0.694567	99.66
14XL14	Sun et al., 2021	Yes	1	116.09	43.93		47.4812	2.49584	12.82	11.6137	0.190446	8.94093	9.58243	3.1173	1.4935	0.511197	1.48347	99.73
14XL13	Sun et al., 2021	Yes	1	116.09	43.93		43.8271	3.48121	11.3391	13.8975	0.23141	12.5364	8.43138	2.39459	2.06257	0.885396	0.553372	99.64
14XL12	Sun et al., 2021	Yes	1	116.09	43.93		41.7897	4.09108	10.8186	15.1017	0.222232	12.4652	8.90947	2.1112	2.1213	1.02025	0.929332	99.58
14XL10	Sun et al., 2021	Yes	1	116.09	43.93		47.2523	2.85161	13.013	12.2641	0.190776	8.30379	9.39825	3.66492	1.61658	0.773146	0.381553	99.71
14XL07	Sun et al., 2021	Yes	1	116.09	43.93		43.1354	3.44558	12.2768	12.8234	0.212191	9.90224	9.35661	3.18286	2.27347	0.909389	2.14212	99.66
14XL06	Sun et al., 2021	Yes	1	116.09	43.93		43.3115	3.40957	12.0237	12.9267	0.200563	10.2187	9.76741	3.86083	2.43684	0.952673	0.531491	99.64
13XL37	Sun et al., 2021	Yes	1	116.09	43.93		42.2001	3.83089	11.8144	14.3351	0.191042	9.21022	9.0594	4.3839	3.00639	1.11609	0.452467	99.6
13XL34	Sun et al., 2021	Yes	1	116.09	43.93		44.1334	3.26431	11.7816	13.2512	0.180792	10.4458	9.28067	3.80668	2.24986	0.883874	0.411805	99.69
13XL30	Sun et al., 2021	Yes	1	116.09	43.93		45.3108	2.85518	12.2652	12.4059	0.180962	10.6365	9.64124	3.48854	1.79956	0.70374	0.442351	99.73
13XL27	Sun et al., 2021	Yes	1	116.09	43.93		49.5908	2.79314	13.038	11.8918	0.161337	6.93747	9.31718	3.07548	1.37136	0.504177	1.10919	99.79
13XL24	Sun et al., 2021	Yes	1	116.09	43.93		42.8835	3.66741	12.218	14.0336	0.190906	9.66588	9.31421	3.76788	2.39135	0.904292	0.612909	99.65
13XL11	Sun et al., 2021	Yes	1	116.09	43.93		46.4923	2.7853	13.099	12.6692	0.18165	9.23387	9.29442	3.19906	1.61467	0.66605	0.494491	99.73
13XL08	Sun et al., 2021	Yes	1	116.09	43.93		43.9251	3.69068	12.2014	13.3422	0.171425	10.6888	8.99476	3.81168	0.988214	0.685699	1.19997	99.7
13XL06	Sun et al., 2021	Yes	1	116.09	43.93		44.0027	3.21062	11.8763	12.8926	0.181164	11.7052	9.09845	3.40185	2.12364	0.764914	0.412651	99.67
13XL05	Sun et al., 2021	Yes	1	116.09	43.93		46.1638	2.80542	11.9859	12.8626	0.17094	11.1815	8.68776	3.35846	1.36752	0.764201	0.351935	99.7
13XL03	Sun et al., 2021	Yes	1	116.09	43.93		44.0535	3.13234	12.4189	12.8679	0.180712	10.3106	9.64801	3.68451	2.2589	0.863401	0.281107	99.7
13XL01	Sun et al., 2021	Yes	1	116.09	43.93		44.4706	3.40382	12.6915	13.5101	0.180734	8.88608	9.1371	3.75525	2.36962	0.883587	0.401631	99.69
10X1W	Sun et al., 2021	Yes	1	116.09	43.93		43.8054	2.88088	12.2161	13.0826	0.176667	10.5298	9.22483	3.95493	2.38902	1.06402	0.461743	99.786
09NC42-4	Sun et al., 2021	Yes	22.8	118.96	42.27		52.4683	2.01645	13.5984	11.9532	0.151994	6.60667	9.16016	2.5839	1.31728	0.283722	0	100.14
09NC41-2	Sun et al., 2021	Yes	22.8	118.96	42.27		52.5954	1.68127	14.2705	11.4919	0.141794	6.4415	9.74327	2.51178	0.75961	0.232947	0	99.87
09NC40-9	Sun et al., 2021	Yes	22.8	118.96	42.27		52.0431	2.06834	13.5253	12.5624	0.152084	6.94516	9.22642	2.53473	1.37889	0.263612	0	100.7
09NC40-8	Sun et al., 2021	Yes	22.8	118.96	42.27		51.9424	2.06756	13.5101	12.1655	0.152027	6.60809	9.45606	2.55405	1.54054	0.273648	0	100.27
09NC37-3	Sun et al., 2021	Yes	8	118.96	42.27		49.3517	2.50202	14.1714	11.5938	0.151945	7.43516	9.31928	2.90721	1.54984	0.597649	0	99.58
09NC36-3	Sun et al., 2021	Yes	8	118.96	42.27	4.78	48.6306	2.13683	12.2437	11.3632	0.14178	10.117	9.5499	3.06853	1.67098	0.597502	0	99.52
09NC36-2	Sun et al., 2021	Yes	8	118.96	42.27	4.63	49.0636	2.09665	11.9519	11.5472	0.151931	10.777	9.0956	3.00823	1.63073	0.567209	0	99.89
09NC36-1	Sun et al., 2021	Yes	8	118.96	42.27		49.121	2.20791	13.0247	11.4462	0.151921	9.11523	8.84178	3.31187	1.78253	0.546914	0	99.55
09NC34-3	Sun et al., 2021	Yes	8	118.96	42.27		47.5877	2.54409	12.3657	11.9475	0.152037	9.45673	9.29456	2.65559	1.44942	0.496656	0	97.95
09NC34-2	Sun et al., 2021	Yes	8	118.96	42.27	3.94	47.808	2.49327	12.2839	11.8465	0.152029	9.64877	9.01025	2.40206	1.39867	0.486493	0	97.53
09NC33-4	Sun et al., 2021	Yes	8	118.96	42.27	3.15	47.2086	2.33054	13.0409	11.6065	0.151992	9.33229	8.84592	2.83718	1.46925	0.516772	0	97.34
09NC33-3	Sun et al., 2021	Yes	8	118.96	42.27		47.7502	2.19856	12.9887	11.3499	0.151974	8.84489	8.08502	2.7558	1.50961	0.405264	0	96.04
09NC32-4	Sun et al., 2021	Yes	8	118.96	42.27	3.92	45.5762	2.98361	12.0359	13.0854	0.162373	9.63078	9.81345	2.56753	1.57299	0.801719	0	98.23
09NC32-3	Sun et al., 2021	Yes	8	118.96	42.27		45.9723	2.97283	12.0638	12.9913	0.162339	9.19243	10.0447	3.04385	1.75529	0.771109	0	98.97
09NC32-2	Sun et al., 2021	Yes	8	118.96	42.27		45.7079	2.92141	11.9798	12.6871	0.172444	9.40329	9.8699	2.9417	1.78531	0.791215	0	98.26
09NC15-2	Sun et al., 2021	Yes	8	118.96	42.27		51.0733	2.1057	13.5251	11.0767	0.14173	8.2102	8.32155	3.37114	1.5894	0.425189	0	99.84
09NC15-1	Sun et al., 2021	Yes	8	118.96	42.27		50.9805	2.05501	13.5955	11.0308	0.141725	8.28078	8.30103	3.33054	1.55897	0.425175	0	99.7
09NC14-5	Sun et al., 2021	Yes	8	118.96	42.27		50.5938	2.37063	13.0081	11.7138	0.141833	8.07434	8.8139	3.13045	1.38794	0.405237	0	99.64
09NC14-4	Sun et al., 2021	Yes	8	118.96	42.27		50.2829	2.45233	13.1534	11.9357	0.14187	7.70153	8.76556	3.19208	1.43897	0.425611	0	99.49
09NC13-5	Sun et al., 2021	Yes	8	118.96	42.27	2.87	47.4999	2.57578	12.8384	12.5009	0.152113	8.49806	9.57299	2.91043	1.66311	0.598312	0	98.81
09NC13-4	Sun et al., 2021	Yes	8	118.96	42.27		48.7543	2.5036	13.0147	12.0754	0.141904	8.04801	8.99066	3.20299	1.54068	0.577754	0	98.85
09NC13-3	Sun et al., 2021	Yes	8	118.96	42.27		51.3625	1.9747	13.6204	11.3262	0.1519	7.86843	8.67857	2.96712	1.19495	0.415194	0	99.56
09NC11-6	Sun et al., 2021	Yes	8	118.96	42.27	1.67	47.8259	2.46274	13.0333	11.9644	0.152021	9.30369	8.96925	2.78705	1.77358	0.608085	0	98.88
09NC11-3	Sun et al., 2021	Yes	8	118.96	42.27		47.555	2.47302	13.034	11.9469	0.15203	9.23329	9.10153	2.696	1.48989	0.618256	0	98.3
09NC11-2	Sun et al., 2021	Yes	8	118.96	42.27		47.3299	2.43237	12.922	11.8734	0.152023	9.42545	9.27343	2.60467	1.39861	0.608093	0	98.02
09NC11-1	Sun et al., 2021	Yes	8	118.96	42.27	2.1	47.3936	2.46293	12.9532	11.9927	0.152032	9.3652	9.23344	2.70618	1.69263	0.60813	0	98.56
09NC09-5	Sun et al., 2021	Yes	8	118.96	42.27		48.2099	2.52403	12.3262	11.9941	0.15205	9.16353	9.04189	2.60512	1.20626	0.516969	0	97.74
09NC09-3	Sun et al., 2021	Yes	8	118.96	42.27		51.9142	2.15761	13.4217	11.6029	0.151944	7.06034	8.90393	3.01862	1.06361	0.395055	0	99.69
09NC09-2	Sun et al., 2021	Yes	8	118.96	42.27		51.9765	2.11673	13.4397	11.3914	0.151919	6.92749	8.87205	2.89658	1.01279	0.384861	0	99.17
09NC08-8	Sun et al., 2021	Yes	8	118.96	42.27		47.1585	2.09661	13.1469	11.2372	0.151928	9.33853	9.31827	2.74484	1.54967	0.597585	0	97.34
09NC08-7	Sun et al., 2021	Yes	8	118.96	42.27		47.9267	2.05559	13.4069	11.0431	0.151891	8.78943	9.04258	2.97707	1.54929	0.597438	0	97.54
09NC08-3	Sun et al., 2021	Yes	8	118.96	42.27	2.59	47.8407	2.07607	13.2666	11.1263	0.151907	9.42838	8.89164	2.56217	1.50895	0.587375	0	97.44
09NC08-2	Sun et al., 2021	Yes	8	118.96	42.27		48.1904	2.08599	13.3159	11.0432	0.141766	9.19455	8.86038	2.5923	1.47842	0.577191	0	97.48
09NC08-1	Sun et al., 2021	Yes	8	118.96	42.27		49.3404	2.41129	12.6542	11.5777	0.151972	8.40914	9.09808	2.7659	1.14486	0.496443	0	98.05
07CL13	Sun et al., 2021	Yes	18.6	118.83	36.71	1.34	45.5319	2.19858	13.0091	11.7876	0.172239	11.9757	8.25734	2.24924	1.48936	0.354609	2.64437	99.67
07CL11	Sun et al., 2021	Yes	18.6	118.83	36.71	2.62	46.392	2.55313	13.4749	11.8603	0.182366	9.33108	8.3382	2.64431	1.49946	0.425522	2.98878	99.69
07CL10	Sun et al., 2021	Yes	18.6	118.83	36.71	1.37	46.2807	2.25933	13.4648	11.7874	0.172236	11.0535	8.28758	2.47209	1.5096	0.374866	2.14788	99.81
07CL09	Sun et al., 2021	Yes	18.6	118.83	36.71	5.94	42.7064	2.73629	13.7828	12.0279	0.222957	9.15137	8.7764	4.82398	2.21944	1.08438	2.11809	99.65
07CL08	Sun et al., 2021	Yes	18.6	118.83	36.71	5.5	43.5253	2.93144	13.5718	12.9877	0.202868	9.82894	9.16962	4.81811	0.892618	0.740467	1.49108	100.16
07CL05	Sun et al., 2021	Yes	18.6	118.83	36.71	5.61	43.6057	2.78614	13.6774	11.7782	0.192497	11.2358	8.90553	3.23193	1.84392	0.587623	1.94524	99.79
07CL04	Sun et al., 2021	Yes	18.6	118.83	36.71	5.74	43.5245	2.59666	14.0281	12.7867	0.243437	7.86098	8.287	4.88902	3.01253	1.13604	1.77506	100.14
07CL03	Sun et al., 2021	Yes	18.6	118.83	36.71	5.96	43.0103	2.5867	13.8566	12.888	0.253598	7.90213	7.9427	5.50816	2.94174	1.11583	1.70418	99.71
07CL01	Sun et al., 2021	Yes	18.6	118.83	36.71	1.26	47.4909	2.22677	14.9396	10.9108	0.172069	8.45161	9.01842	3.28955	1.0729	0.414989	1.86239	99.85
RZL10-6	Tang et al., 2014	No	115	121.5	37.34		59.3	0.63	17.4	4.914	0.09	2.71	4.57	4.27	4.37	0.36	0.55	99.7
RZL10-2	Tang et al., 2014	No	115	121.5	37.34		56.5	0.74	17.7	5.958	0.11	3.55	5.55	4.35	3.79	0.47	0.41	99.7
RZL10-1	Tang et al., 2014	No	115	121.5	37.34	-15.9	58.2	0.66	17.7	5.193	0.1	3	5.09	4.37	4.12	0.4	0.26	99.7
SZ-3/1	Teng et al., 2017	Yes	127.01	116.37	40.3		46	2.51	16.76	10.746	0.15	4.82	8.87	1.33	4.46	1.37	0.49	98.7
SZ-2/3	Teng et al., 2017	Yes	127.8	116.37	40.3		47.37	2.27	15.5	11.565	0.17	5.24	7.54	2.27	4.14	1.15	0.35	98.85
SZ-2/1	Teng et al., 2017	Yes	123.1	116.37	40.3		46.95	2.21	15.57	10.836	0.13	5.75	7.57	2.38	4.42	1.39	0.73	99.14
SZ-1/6A	Teng et al., 2017	Yes	127.8	116.37	40.3		58.28	1.12	17.91	5.148	0.06	2.01	3.7	3.9	5.45	0.42	0.4	98.97
SZ-1/5A	Teng et al., 2017	Yes	123.1	116.37	40.3		44	2.66	10.77	14.508	0.15	9.96	12.49	0.55	1.99	0.16	0.18	99.03
SZ-1/4B	Teng et al., 2017	Yes	127.01	116.37	40.3		45.87	1.35	13.58	11.529	0.14	11.06	10.38	0.59	2.28	0.27	0.4	98.73
SZ-1/4A	Teng et al., 2017	Yes	127.01	116.37	40.3		42.82	1.86	8.76	12.843	0.16	16.97	10.03	0.73	1.67	0.76	1.03	99.06
SZ-1/3D	Teng et al., 2017	Yes	127.01	116.37	40.3		44.62	2.02	16.5	12.258	0.1	6.51	10.95	0.53	2.7	0.12	1.71	99.38
SZ-1/2B	Teng et al., 2017	Yes	127.01	116.37	40.3		49.27	2.32	15.3	10.485	0.13	4.36	6.36	2.94	4.73	1.24	0.46	98.76
SZ-1/2A	Teng et al., 2017	Yes	127.01	116.37	40.3		47.91	2.42	15.32	11.394	0.13	4.96	7.06	1.38	4.74	1.3	0.73	98.61
TL-9	Wan et al., 2019	Yes	140	120.58	40.38		47.16	1.42	14.02	11.025	0.16	7.74	7.56	3.04	2.39	0.97	3.14	99.85
TL-8	Wan et al., 2019	Yes	140	120.58	40.38		48.32	2	12.51	14.805	0.24	5.43	9.54	1.86	1.75	0.21	1.75	100.06
TL-7	Wan et al., 2019	Yes	156	120.58	40.38	-2	47.33	2.21	13.47	12.402	0.16	6.59	7.38	4.31	2.36	1.36	1.2	100.15
TL-6	Wan et al., 2019	Yes	162	120.58	40.38	-1.4	46.36	1.43	10.75	10.332	0.18	14.76	9.36	2.46	0.69	0.39	1.82	99.68
TL-5	Wan et al., 2019	Yes	139	120.58	40.38		45.95	1.54	12.85	10.89	0.17	10.77	8.77	2.48	1.32	0.7	3.03	99.68
TL-4	Wan et al., 2019	Yes	139	120.58	40.38	-0.9	47.87	1.74	14.88	9.891	0.14	7.16	7.49	3.15	1.5	0.45	4.47	99.84
TL-3	Wan et al., 2019	Yes	139	120.58	40.38		52.57	1.75	15.09	10.017	0.12	4.53	4.29	5.18	2.42	1.54	1.63	100.25
TL-2	Wan et al., 2019	Yes	140	120.58	40.38	-2.3	61.12	0.55	17.51	4.14	0.06	2.47	4.44	4.8	2.39	0.2	2.07	100.21
TL-10	Wan et al., 2019	Yes	140	120.58	40.38		47.34	1.61	12.11	10.071	0.17	11.88	9.06	3.09	1.31	0.44	1.5	99.7
TL-1	Wan et al., 2019	Yes	165	120.58	40.38	-3.4	51.69	0.83	16.14	6.471	0.1	1.78	6.41	3.99	3.13	0.76	7.7	99.72
DG4	Wang et al., 2006	Yes	125.2	113.82	36.08	-13.18	52.48	0.59	13.13	7.866	0.11	10.71	8.13	2.51	1.65	0.23	2.15	99.99
DG3	Wang et al., 2006	Yes	125.2	113.82	36.08	-13.5	52.98	0.58	13.27	8.001	0.12	9.8	7.86	2.49	1.83	0.24	2.28	99.91
DG2	Wang et al., 2006	Yes	125.2	113.82	36.08	-15.07	52.25	0.61	12.93	8.35	0.12	10.81	7.92	2.53	1.86	0.22	1.96	99.92
DG1	Wang et al., 2006	Yes	125.2	113.82	36.08	-13.09	52.92	0.56	13.31	7.768	0.12	9.78	7.9	2.37	1.89	0.24	2.19	99.49
20HD8	Wang et al., 2006	Yes	125.2	113.82	36.08	-13.54	53.28	0.61	13.32	8.284	0.14	9.81	8.13	3.74	1.06	0.18	1.07	99.97
20HD79	Wang et al., 2006	Yes	125.2	113.82	36.08		52.06	0.61	12.3	9.05	0.16	10.69	9.1	3.55	0.77	0.18	1.11	99.97
20HD78	Wang et al., 2006	Yes	125.2	113.82	36.08	-12.58	52.32	0.6	12.58	8.677	0.15	10.38	9.2	3.55	0.97	0.2	1.09	100.1
20HD70	Wang et al., 2006	Yes	125.2	113.82	36.08		54.4	0.59	13.57	7.769	0.16	9.01	7.3	3.84	1.54	0.3	1.12	99.85
20HD51	Wang et al., 2006	Yes	125.2	113.82	36.08	-14.92	54.7	0.59	13.59	7.481	0.14	9.01	7.03	3.22	2.27	0.27	1.08	99.6
20HD50	Wang et al., 2006	Yes	125.2	113.82	36.08		53.89	0.59	13.68	7.676	0.15	9.44	7.4	3.12	1.94	0.26	1.27	99.68
20HD47	Wang et al., 2006	Yes	125.2	113.82	36.08	-12.67	53.37	0.57	13.37	8.1	0.16	9.09	7.79	2.96	1.96	0.26	1.79	99.72
20HD46	Wang et al., 2006	Yes	125.2	113.82	36.08	-12.47	53.77	0.6	13.3	7.984	0.15	8.86	7.69	3	1.98	0.26	1.82	99.72
20HD45	Wang et al., 2006	Yes	125.2	113.82	36.08	-12.63	53.82	0.58	13.42	7.97	0.15	8.83	7.8	3.04	2.03	0.26	1.52	99.72
20HD43	Wang et al., 2006	Yes	125.2	113.82	36.08	-13.8	54.19	0.57	13.42	7.665	0.14	8.87	7.56	2.98	2.16	0.26	1.19	99.29
20HD42	Wang et al., 2006	Yes	125.2	113.82	36.08	-12.83	53.7	0.59	13.22	8.03	0.15	8.9	7.98	3.07	1.9	0.26	1.6	99.7
20HD41	Wang et al., 2006	Yes	125.2	113.82	36.08	-12.81	53.92	0.57	13.36	7.778	0.15	8.94	7.57	3.08	1.98	0.25	1.84	99.71
20HD40	Wang et al., 2006	Yes	125.2	113.82	36.08		53.49	0.59	13.48	8.071	0.16	9.02	7.74	2.97	1.99	0.26	1.63	99.69
P1-8-2	Wang et al., 2007	Yes	197	115.9	39.9	-6.5	46.56	1.96	16.23	10.098	0.23	4.48	6.6	4.67	0.2	0.67	6.79	99.61
P1-8-3	Wang et al., 2007	Yes	197	115.9	39.9	-7	49	2	15.68	10.107	0.15	6.4	5.5	2.55	2.95	0.7	3.81	99.96
P1-8-4	Wang et al., 2007	Yes	197	115.9	39.9	-8.6	50.23	2.01	16.48	9.639	0.16	5.21	7.77	4.02	0.83	0.75	2.74	100.91
P1-8-5	Wang et al., 2007	Yes	197	115.9	39.9	-12.7	49.89	2.24	16.66	10.26	0.16	4.45	4.98	2.43	3.75	1.15	3.57	100.69
P1-11-1	Wang et al., 2007	Yes	197	115.9	39.9	-9.2	47.99	1.81	16.15	10.053	0.13	5.31	10.06	3.09	0.68	0.79	3.05	100.21
P1-12-1	Wang et al., 2007	Yes	197	115.9	39.9	-11.4	50.76	1.74	15.6	9.162	0.13	4.69	7.08	3.39	2.77	1.02	2.66	100.03
P1-14-1	Wang et al., 2007	Yes	197	115.9	39.9	-7.5	49.69	2.11	16.65	13.338	0.15	1.64	3.44	5.82	2.84	0.68	2.46	100.3
P1-14-3	Wang et al., 2007	Yes	197	115.9	39.9	-11.3	46.31	2.11	20.74	11.331	0.2	1.97	2.69	0.75	8.42	0.82	3.63	100.22
P1-16-1	Wang et al., 2007	Yes	197	115.9	39.9	-12.5	51.31	1.94	19.51	8.838	0.11	1.06	3.22	2.2	6.76	1.15	3.07	100.14
P1-16-2	Wang et al., 2007	Yes	197	115.9	39.9	-13.8	51.23	1.76	17.93	10.206	0.17	1.4	4.69	2.52	5.55	0.95	2.63	100.18
P1-16-3	Wang et al., 2007	Yes	197	115.9	39.9	-5	53	2	17.18	11.142	0.07	2.26	2.31	1.65	5.68	0.52	3.2	100.26
P1-16-4	Wang et al., 2007	Yes	197	115.9	39.9	-5.3	47.86	1.73	15.93	9.756	0.21	6.53	8.98	2.27	0.48	0.45	5.26	100.54
06SW50	Wang et al., 2011	No	38	117.7	32.53	2.55	47.77	1.95	15	11.529	0.16	6.41	8.39	3.76	1.89	0.54	0.95	99.63
06SW49	Wang et al., 2011	No	38	117.7	32.53	2.15	47.9	1.91	14.88	11.493	0.16	7.23	8.41	3.64	1.83	0.53	0.92	100.18
06SW48	Wang et al., 2011	No	38	117.7	32.53	1.81	48.15	1.96	15.13	11.7	0.16	6.74	8.19	3.74	1.51	0.56	1	100.14
06SW47	Wang et al., 2011	No	38	117.7	32.53	2.08	47.68	1.95	15.21	11.7	0.16	6.46	8.33	4.03	1.52	0.55	0.83	99.73
06SW45	Wang et al., 2011	No	38	117.7	32.53	2.24	47.62	1.97	15.06	11.619	0.16	6.56	8.27	4.07	1.48	0.56	1.02	99.68
06SW37	Wang et al., 2011	No	38	117.7	32.53	3.9	46.1	2.61	13.04	12.15	0.18	6.7	9.17	3.61	1.57	0.84	2.32	99.64
06SW15	Wang et al., 2011	No	9.8	119.85	32.91	6.7	40.28	2.52	11.4	12.798	0.21	9.62	10.22	4.68	1.77	1.22	3.7	99.84
06SW13	Wang et al., 2011	No	9.8	119.85	32.91	6.9	39.94	2.51	11.47	12.798	0.21	9.47	10.07	4.99	1.91	1.21	3.41	99.41
06SW12	Wang et al., 2011	No	9.8	119.85	32.91	6.32	41.33	2.53	11.83	12.834	0.21	8.6	10.02	6.16	2.13	1.21	1.98	100.26
06SW11	Wang et al., 2011	No	9.8	119.85	32.91	6.89	40.66	2.71	11.89	12.951	0.2	8.97	9.34	5.56	2.15	0.99	3.2	100.06
06SW09	Wang et al., 2011	No	9.8	119.85	32.91	7	41.31	2.6	12.23	13.644	0.2	7.31	9.54	6.76	1.88	1.12	1.32	99.43
06SW08	Wang et al., 2011	No	5.2	119.85	32.91	6.38	42.17	2.48	11.9	12.834	0.2	7.95	9.75	5.5	1.84	1.32	2.38	99.75
06SW07	Wang et al., 2011	No	5.2	119.85	32.91	6.77	41.62	2.41	11.86	12.312	0.19	10.14	9.63	5.54	2.13	1.28	1.18	99.66
06SW05	Wang et al., 2011	No	5.2	119.85	32.91	6.66	41.82	2.58	11.91	12.744	0.21	8.54	9.53	6.11	2.32	1.29	1.62	100.09
06SW04	Wang et al., 2011	No	5.2	119.85	32.91	6.65	41.87	2.43	11.86	12.51	0.19	8.93	9.58	6.05	1.95	1.39	1.58	99.73
06SW03	Wang et al., 2011	No	5.2	119.85	32.91	6.78	42.06	2.51	12.05	12.78	0.19	8.15	9.54	6.05	1.81	1.32	2.1	99.98
05NS04	Wang et al., 2011	No	0.635	117.98	32.78	7.09	39.21	1.99	14.18	12.141	0.18	8.76	8.31	3.24	0.45	1.37	8.13	99.31
05NS02	Wang et al., 2011	No	0.635	117.98	32.78	7.26	42.28	2.08	13.88	11.718	0.17	9.19	7.5	6.66	3.37	1.15	0.58	99.88
05HF18	Wang et al., 2011	Yes	38.3	117.26	31.85	5	43.76	1.87	13.4	11.304	0.17	10.83	8.4	5.72	1.86	0.73	1.03	100.33
05HF17	Wang et al., 2011	Yes	38.3	117.26	31.85	3.85	44.83	1.89	13.35	10.926	0.17	10.06	8.46	5.68	2.05	0.74	0.97	100.34
05HF15	Wang et al., 2011	Yes	38.3	117.26	31.85	5.84	42.68	2.09	12.63	11.835	0.16	11.61	7.79	5.73	2.27	0.83	1.3	100.24
05HF10	Wang et al., 2011	Yes	38.3	117.26	31.85	6.2	42.88	2.04	12.91	11.808	0.16	11.03	7.85	5.44	2.26	0.85	1.57	100.11
05HF09	Wang et al., 2011	Yes	36.2	117.26	31.85	3.39	46.16	1.97	14.38	10.467	0.15	8.93	8.9	4.41	1.76	0.44	1.18	99.91
05HF08	Wang et al., 2011	Yes	36.2	117.26	31.85	3.43	45.96	1.94	13.73	10.989	0.16	10.27	8.95	4.5	1.6	0.42	0.68	100.42
05HF04	Wang et al., 2011	Yes	36.2	117.26	31.85	3.51	45.65	1.75	13.76	10.719	0.16	10.68	9.09	4.27	1.34	0.38	1.03	100.02
05HF02	Wang et al., 2011	Yes	36.2	117.26	31.85	3.52	45.73	1.69	13.24	11.016	0.16	11.54	9.21	3.57	1.51	0.36	0.8	100.05
17ZY26	Wang et al., 2020a	Yes	131	120.34	37.33	-15.5	46.438	0.843	13.77	6.9858	0.133	7.698	8.002	2.201	3.314	0.5	8.718	99.379
17ZY-24	Wang et al., 2020a	Yes	131	120.34	37.33	-16.4	44.298	0.613	12.636	6.6267	0.127	7.718	8.372	1.173	3.278	0.199	13.125	98.902
17ZY-23-2	Wang et al., 2020a	Yes	131	120.34	37.33	-13.5	44.071	0.847	13.747	6.174	0.119	6.657	8.604	1.71	3.013	0.242	13.386	99.256
17ZY-23-1	Wang et al., 2020a	Yes	131	120.34	37.33	-13.7	46.757	0.822	13.58	6.4341	0.114	8.66	7.29	2.269	2.317	0.247	9.986	99.191
17XS27	Wang et al., 2020a	Yes	131	120.5	37.46	-15.2	50.874	0.798	14.26	6.7689	0.121	9.248	7.335	2.907	2.272	0.257	3.53	99.123
17XS26	Wang et al., 2020a	Yes	131	120.5	37.46	-15.9	48.457	0.893	14.283	7.353	0.128	9.224	8.42	2.479	2.102	0.382	4.646	99.184
17XS25	Wang et al., 2020a	Yes	131	120.5	37.46	-16.8	49.422	0.634	14.068	6.1128	0.105	7.195	7.598	2.408	2.085	0.2	9.003	99.51
17XS23	Wang et al., 2020a	Yes	131	120.5	37.46	-16.5	50.759	0.65	13.777	6.1263	0.102	8.015	6.749	3.267	1.859	0.195	6.914	99.094
17XS19	Wang et al., 2020a	Yes	131	120.5	37.46	-15.7	44.981	0.673	13.047	5.1426	0.119	5.843	9.252	0.872	3.121	0.206	15.231	99.059
17XS18	Wang et al., 2020a	Yes	131	120.5	37.46		47.105	0.705	13.401	6.9489	0.115	9.647	7.963	1.938	2.302	0.251	8.282	99.43
17XS16	Wang et al., 2020a	Yes	131	120.5	37.46		49.453	0.6	13.41	5.8923	0.094	7.5	6.416	2.299	2.368	0.185	10.67	99.542
17XS14	Wang et al., 2020a	Yes	131	120.5	37.46		48.268	0.826	13.626	7.1388	0.122	8.826	8.68	2.395	1.807	0.301	6.1	98.883
17XS12	Wang et al., 2020a	Yes	131	120.5	37.46	-16.2	49.486	0.783	14.063	5.8167	0.125	6.215	7.088	2.621	2.582	0.338	9.878	99.642
17XS11*	Wang et al., 2020a	Yes	131	120.5	37.46		50.413	0.783	14.177	5.958	0.128	6.391	8.116	2.495	1.768	0.339	7.983	99.213
17XS11	Wang et al., 2020a	Yes	131	120.5	37.46		50.474	0.79	14.206	5.9652	0.128	6.386	8.14	2.526	1.77	0.342	8.037	99.427
17XS09	Wang et al., 2020a	Yes	131	120.5	37.46		50.102	0.78	14.108	6.0075	0.118	6.484	7.797	2.608	2.319	0.328	8.598	99.917
17XS08	Wang et al., 2020a	Yes	131	120.5	37.46	-15.8	49.344	0.807	14.057	6.1929	0.117	6.919	7.389	2.656	2.274	0.348	8.383	99.175
17XS06	Wang et al., 2020a	Yes	131	120.5	37.46	-12.9	45.226	0.706	12.352	6.8625	0.118	10.286	7.77	1.929	2.173	0.229	11.268	99.682
17XS05	Wang et al., 2020a	Yes	131	120.5	37.46	-14.8	50.609	0.778	13.861	6.9327	0.122	8.841	8.14	2.551	2.207	0.29	4.133	99.235
17XS03	Wang et al., 2020a	Yes	131	120.5	37.46		50.01	0.812	14.183	6.7914	0.118	7.916	8.058	2.379	2.514	0.343	6.502	100.381
17XS02	Wang et al., 2020a	Yes	131	120.5	37.46	-15.5	45.731	0.829	12.879	7.2594	0.13	10.906	8.1	2.027	2.265	0.346	9.084	100.363
17XS01	Wang et al., 2020a	Yes	131	120.5	37.46	-15.1	47.637	0.746	13.41	6.8634	0.11	9.322	7.597	2.139	1.968	0.244	9.316	100.115
17QX23	Wang et al., 2020a	Yes	131	120.2	37.2		54.221	0.846	14.141	5.625	0.113	5.51	5.816	2.261	5.566	0.76	2.539	98.023
17QX22	Wang et al., 2020a	Yes	131	120.2	37.2	-16.2	48.088	0.999	15.144	7.0038	0.304	5.678	7.201	2.048	2.808	0.91	8.521	99.484
17QX21	Wang et al., 2020a	Yes	131	120.2	37.2	-17.2	44.168	0.758	9.85	6.9264	0.266	10.569	9.808	0.964	3.864	1.11	9.776	98.829
17QX20C	Wang et al., 2020a	Yes	131	120.2	37.2	-15.9	46.166	0.742	13.153	7.1496	0.131	11.249	9.389	1.821	1.931	0.403	5.728	98.657
17QX20B	Wang et al., 2020a	Yes	131	120.2	37.2	-16	47.885	0.705	12.933	6.7302	0.121	9.632	9.383	2.049	1.98	0.372	5.624	98.162
17QX20A	Wang et al., 2020a	Yes	131	120.2	37.2		50.193	0.761	13.059	6.7311	0.11	10.527	7.832	2.116	1.764	0.364	4.814	99.019
WZ-9(2)	Wang et al., 2020b	No	174	117.28	33.97	-4	51.65	1.08	12.69	8.442	0.12	10.25	6.23	3.8	2.07	0.3	3.368	100
WZ-22	Wang et al., 2020b	No	174	117.28	33.97	-5	51.58	1.13	13.7	8.325	0.08	7.62	7.99	3.66	1.76	0.3	3.855	100
WZ-16	Wang et al., 2020b	No	174	117.28	33.97	-7	51.66	1.11	12.7	8.343	0.12	9.9	6.34	3.75	2.27	0.31	3.497	100
WZ-15	Wang et al., 2020b	No	167	117.28	33.97	-4	51.46	1.12	12.56	8.352	0.14	10.3	6.67	3.62	1.92	0.3	3.558	100
WZ-14	Wang et al., 2020b	No	170	117.28	33.97	-3	51.97	1.1	12.22	8.433	0.14	10.2	6.62	3.63	1.88	0.3	3.507	100
WZ-13	Wang et al., 2020b	No	174	117.28	33.97	-2	51.84	1.11	13.48	8.28	0.12	8.47	5.91	4.07	2.46	0.31	3.95	100
WZ-10	Wang et al., 2020b	No	174	117.28	33.97	-4	52.48	1.06	12.2	8.217	0.12	10.1	7.43	3.14	1.52	0.29	3.443	100
WZ-1	Wang et al., 2020b	No	174	117.28	33.97	-5	51.65	1.07	12.36	8.208	0.12	10.05	6.57	3.68	1.91	0.3	4.082	100
WZ-09	Wang et al., 2020b	No	174	117.28	33.97	-4	51.59	1.05	12.2	9.432	0.13	9.62	6.14	3.82	2.33	0.29	3.398	100
WZ-04	Wang et al., 2020b	No	174	117.28	33.97	-2	52.52	1.05	13.25	8.64	0.14	8.6	8.3	3.11	1.43	0.28	2.68	100
SCYM-5	Xiong et al., 2017	Yes	167	119.075	40.6467	-0.1	55.29	0.84	14.1	4.761	0.0589945	6.34	5.88	3.65	3.55	0.94	3.42	99.68
SCYM-2	Xiong et al., 2017	Yes	167	119.075	40.6467	-7.4	49.09	1.05	11.7	7.155	0.113858	13.69	5.88	1.3	4.98	0.63	2.42	99.31
SCYM-17	Xiong et al., 2017	Yes	167	119.075	40.6467		53.73	0.99	14.14	6.12	0.0926873	5.7	6.14	3.85	4.59	0.83	2.42	99.79
SCYM-16	Xiong et al., 2017	Yes	167	119.075	40.6467	-0.4	48.49	1.23	12.37	7.155	0.102756	9.67	8.16	2.5	4.21	0.99	3.06	99.11
SCYM-15	Xiong et al., 2017	Yes	167	119.075	40.6467	-10.7	51.96	0.73	12.43	6.633	0.0947527	11.72	5.19	2.63	2.58	0.46	3.66	99.25
SCYM-12	Xiong et al., 2017	Yes	167	119.075	40.6467		54.58	0.8	13.42	5.787	0.0867491	7.16	5.06	3.25	4.99	0.78	2.01	99.18
SCYM-11	Xiong et al., 2017	Yes	167	119.075	40.6467	-8.5	56.42	0.81	14.03	5.985	0.0537018	7.9	2.71	3.12	4.38	0.77	2.05	99.36
YN-31	Xu et al., 2004	Yes	127	118.32	35.45	-12.6	51.76	1	14.36	7.749	0.14	7.52	9.47	3.33	2.97	0.74	0.58	100.48
YN-30	Xu et al., 2004	Yes	127	118.32	35.45	-14.5	57.3	0.84	15.44	5.796	0.1	5.01	6.62	3.89	3.54	0.44	0.78	100.4
YN-29	Xu et al., 2004	Yes	127	118.32	35.45	-14.6	55.17	0.92	15.13	6.786	0.12	6.52	8.44	3.79	2.09	0.54	0.43	100.69
YN-28	Xu et al., 2004	Yes	127	118.32	35.45	-15.2	53.11	1.15	15.59	7.506	0.13	5.84	8.44	3.57	3.35	0.72	0.38	100.62
YN-27	Xu et al., 2004	Yes	127	118.32	35.45	-14.3	50.93	0.87	14.31	8.208	0.15	8.92	10.46	2.91	1.5	0.65	0.71	100.55
YN-26	Xu et al., 2004	Yes	127	118.32	35.45	-14.4	50.24	0.98	14.4	8.514	0.15	8.81	10.64	2.83	1.74	0.77	0.9	100.93
YN-25	Xu et al., 2004	Yes	127	118.32	35.45	-14.5	50.84	1.04	15.69	8.289	0.14	6.9	10.16	3.36	2.06	0.86	0.84	101.09
YN-24	Xu et al., 2004	Yes	127	118.32	35.45	-15	53.39	1.11	15.7	7.29	0.13	5.92	8.02	3.47	3.16	0.71	0.46	100.16
YN-23	Xu et al., 2004	Yes	127	118.32	35.45	-15.4	52.25	1.19	16.11	7.659	0.13	6	8.65	3.6	3.33	0.72	0.33	100.83
ZKD08-50	Xu et al., 2012	Yes	134	115.95	39.73		50.02	0.78	10.84	8.784	0.17	12.55	8.54	1.74	1.67	0.42	3.91	99.7
ZKD08-46	Xu et al., 2012	Yes	134	115.95	39.73		52.64	1.04	14.28	7.974	0.16	6.02	6.86	2.29	4.68	0.51	2.96	99.69
ZKD08-45	Xu et al., 2012	Yes	134	115.95	39.73		51.3	1.56	15.64	7.704	0.14	6.19	6.67	3.68	3.43	0.89	2.04	99.51
ZKD08-44	Xu et al., 2012	Yes	134	115.95	39.73		51.89	1.36	15.09	7.245	0.12	6.2	6.58	2.99	2.16	0.34	5.54	99.71
LYN-4/1	Xue et al., 2019	Yes	123.5	114.86	39.4		55.05	1.57	16.01	7.253	0.09	4.4	3.81	3.96	4.05	0.95	2.08	99.88
LYN-2/1	Xue et al., 2019	Yes	112	114.86	39.4		46.65	1.45	16.01	7.586	0.13	4.47	7.06	4.22	3.7	0.98	6.39	99.25
LYN-1/1	Xue et al., 2019	Yes	112	114.86	39.4		46.97	1.44	15.72	7.889	0.12	4.65	6.75	3.48	3.79	0.99	6.88	99.24
LY-8/1	Xue et al., 2019	Yes	112	114.86	39.4		44.57	2.01	16.63	9.31	0.14	4.96	7.85	3.47	3.67	1.14	4.62	99.31
LY-7/1	Xue et al., 2019	Yes	123.5	114.86	39.4		47.98	1.62	14.39	8.142	0.12	5.01	6.03	2.84	3.76	0.93	7.39	99.38
LY-26/2	Xue et al., 2019	Yes	123.5	114.86	39.4		56.82	1.15	15.98	6.004	0.08	2.71	3.48	4.63	4.12	0.97	2.91	99.52
LY-26/1	Xue et al., 2019	Yes	123.5	114.86	39.4		56.5	1.14	15.9	5.988	0.07	2.68	3.65	4.21	4.51	0.98	3.04	99.4
LY-18/1	Xue et al., 2019	Yes	123.5	114.86	39.4		48.32	2.08	15.26	8.772	0.11	4.57	6.07	3.17	4.36	1.14	4.42	99.44
LY-16/2	Xue et al., 2019	Yes	123.5	114.86	39.4		55.6	1.09	15.23	5.423	0.09	2.5	5.2	5.22	2.84	0.86	4.52	99.16
LY-15/2	Xue et al., 2019	Yes	123.5	114.86	39.4		50.44	1.59	15.44	7.136	0.09	4.36	5.51	4.51	3.04	1.02	5.65	99.59
LY-15/1	Xue et al., 2019	Yes	123.5	114.86	39.4		51.77	1.6	15.82	7.312	0.09	4.82	4.75	3.36	4.25	1	4.23	99.57
LY-13/2	Xue et al., 2019	Yes	123.5	114.86	39.4		50.16	1.91	15.51	8.668	0.12	5.22	5.56	3.7	4.17	0.95	2.38	99.48
LY-13/1	Xue et al., 2019	Yes	123.5	114.86	39.4		50.25	1.95	15.66	8.747	0.11	4.52	5.29	3.7	4.5	1.03	2.71	99.57
97CK07	Yan et al., 2005	No	73.2	120.07	36.13	7.55	44.34	2.45	14.04	11.852	0.19	9.72	8.89	3.59	1.98	0.58	1.66	99.69
01SD155	Yan et al., 2005	No	73.2	120.07	36.13	7.08	45.07	2.55	13.32	12.377	0.2	9.4	9.11	3.65	1.28	0.57	1.9	99.73
01SD154	Yan et al., 2005	No	73.2	120.07	36.13	7.28	45.01	2.57	13.48	12.425	0.2	9.37	9.03	3.61	1.27	0.6	1.89	99.73
01SD152	Yan et al., 2005	No	73.2	120.07	36.13	7.24	44.92	2.48	13.51	12.066	0.19	9.69	9.26	3.27	1.54	0.52	1.94	99.71
01SD151	Yan et al., 2005	No	73.2	120.07	36.13	7.45	44.91	2.5	13.32	12.207	0.2	9.99	9.32	2.85	2	0.48	1.67	99.72
HFG-15	Yang and Li, 2008	Yes	160	120.77	41.84	-12	52.37	1.02	16.5	7.623	0.19	1.61	8.19	3.98	2.69	0.26	4.96	100.23
HFG-13	Yang and Li, 2008	Yes	160	120.77	41.84	-11.5	53.24	1.09	18.28	7.947	0.14	3.16	6.86	3.99	1.74	0.33	1.61	99.26
HBJ4-3	Yang and Li, 2008	Yes	125	120.81	41.61	-9.7	52.84	0.89	15.6	7.497	0.09	7.03	7.17	4.13	1.91	0.36	2.34	100.71
HBJ4-2	Yang and Li, 2008	Yes	125	120.81	41.61	-12	53.16	0.9	15.71	7.299	0.11	6.23	7.16	4.18	1.92	0.36	2.29	100.13
HBJ4-1	Yang and Li, 2008	Yes	125	120.81	41.61	-10.6	54.83	0.86	15.22	7.092	0.1	6.45	6.73	3.79	1.65	0.34	2.08	99.93
ZCZ1-4	Yang and Li, 2008	Yes	123	120.7	41.75	-12.7	62.17	0.74	14.53	4.689	0.07	3.58	3.83	3.63	3.1	0.23	3.68	100.77
ZCZ1-3	Yang and Li, 2008	Yes	123	120.7	41.75	-12.9	61.67	0.74	14.51	4.725	0.07	3.77	3.82	3.65	3.09	0.21	3.05	99.83
ZCZ1-2	Yang and Li, 2008	Yes	123	120.7	41.75	-12.5	59.84	0.76	14.96	4.653	0.08	3.36	4.24	3.71	3.19	0.23	4.53	100.07
ZCZ1-1	Yang and Li, 2008	Yes	123	120.7	41.75	-12.1	60.19	0.77	15.17	5.094	0.09	3.3	4.14	3.52	2.68	0.22	4.05	99.78
WHC-4	Yang and Li, 2008	Yes	106	121.83	42.25	4.59	43.31	2.94	14.99	10.71	0.17	8.32	9.5	3.94	0.76	0.71	2.71	99.26
WHC-3	Yang and Li, 2008	Yes	106	121.83	42.25	4.56	43.37	2.97	15.12	10.962	0.18	8.54	9.78	3.95	0.74	0.71	3.17	100.7
WHC-2	Yang and Li, 2008	Yes	106	121.83	42.25	5.74	42.71	2.96	14.88	10.998	0.17	8.39	9.67	3.76	0.7	0.71	3.19	99.35
WHC-1	Yang and Li, 2008	Yes	106	121.83	42.25	5.51	43.57	2.99	15.14	11.088	0.18	8.43	9.76	3.91	0.8	0.73	2.57	100.38
SHT-3	Yang and Li, 2008	Yes	123	120.7	41.75	-11.9	56.67	0.74	15.04	5.634	0.09	5.92	5.36	4.26	2.66	0.46	2.63	100.07
SHT-14	Yang and Li, 2008	Yes	123	120.7	41.75	-13.4	55.78	1.1	15.47	7.11	0.11	5.21	5.92	4.06	2.4	0.55	2.36	100.87
JG-5	Yang and Li, 2008	Yes	106	121.83	42.25	4.3	45.75	2.96	15.06	10.467	0.17	8.36	10.22	3.04	1.4	0.62	1.38	100.59
JG-4	Yang and Li, 2008	Yes	106	121.83	42.25	4.74	43.89	2.98	15.2	10.665	0.18	8.86	10.46	3.33	1.46	0.65	1.57	100.42
JG-3	Yang and Li, 2008	Yes	106	121.83	42.25	4.36	45.19	2.97	15	10.593	0.17	8.49	10.38	3	1.37	0.61	1.42	100.37
JG-2	Yang and Li, 2008	Yes	106	121.83	42.25	4.44	44.63	2.96	14.94	10.476	0.17	8.52	10.27	3.06	1.37	0.63	1.35	99.54
JG-1	Yang and Li, 2008	Yes	106	121.83	42.25	4.75	45.18	2.97	14.98	10.611	0.17	8.4	10.39	2.98	1.37	0.63	1.35	100.21
XC-M09	Yang et al., 2004	Yes	127.9	117.94	36.83	-11.2	57.33	0.66	13.3	5.967	0.15	8.69	5.66	2.8	2.22	0.18	2.21	99.83
XC-M04	Yang et al., 2004	Yes	127.9	117.94	36.83	-10.1	58.5	0.62	14.78	4.608	0.1	4.33	4.99	3.69	2.97	0.25	4.43	99.78
XC-M02	Yang et al., 2004	Yes	127.9	117.94	36.83	-10.9	57.85	0.65	12.58	6.228	0.2	8.19	5.32	2.73	2.4	0.18	2.96	99.98
XC-M01	Yang et al., 2004	Yes	127.9	117.94	36.83	-10.9	56.59	0.63	12.47	6.264	0.18	8.51	5.89	2.95	2.2	0.19	3.49	100.06
MP-M09	Yang et al., 2004	No	120	121.6	37.39	-16.8	49.21	0.63	14.67	6.426	0.16	4.85	6.37		3.59	0.33	13.52	100.47
MP-M08	Yang et al., 2004	No	120	121.6	37.39	-16.6	49.01	0.55	13.34	7.425	0.17	4.72	6.89		2.81	0.26	14.25	100.25
MP-M07	Yang et al., 2004	No	120	121.6	37.39	-16.7	48.31	0.65	14.66	7.101	0.13	5.32	5.98		3.5	0.31	13.51	100.26
MP-M06	Yang et al., 2004	No	120	121.6	37.39	-16.4	47.84	0.59	14.51	4.977	0.14	5.01	6.69	0.41	4.13	0.28	14.81	99.94
MP-M05	Yang et al., 2004	No	120	121.6	37.39	-16.8	50.64	0.61	14.84	4.977	0.1	4.67	5.93	1.57	3.51	0.29	12.3	99.99
MP-M04	Yang et al., 2004	No	120	121.6	37.39	-16.2	47.34	0.79	13.39	6.678	0.21	8.49	8.97	2.27	1.94	0.32	9.15	100.29
MP-M02	Yang et al., 2004	No	120	121.6	37.39		46.49	0.83	14.5	7.038	0.18	5.99	9.94	2.67	1.63	0.39	9.69	100.13
MP-M01	Yang et al., 2004	No	120	121.6	37.39	-12.4	47.35	0.83	14.5	6.381	0.11	7.75	7.78	1.83	2.18	0.37	10.69	100.48
LL-M08	Yang et al., 2004	Yes	123.9	120.48	37.42	-14.1	46.61	0.79	12.62	6.678	0.16	8.49	7.51	2.22	2.1	0.34	11.49	99.75
LL-M06	Yang et al., 2004	Yes	123.9	120.48	37.42	-15.1	46.26	0.8	13.52	7.371	0.18	8.85	8.26	1.95	2.53	0.37	9.24	100.15
JQ-M03	Yang et al., 2004	Yes	122.6	120.48	37.42	-15	49.15	0.9	15.36	8.532	0.16	7.33	8.78	2.5	1.53	0.15	4.34	99.68
JQ-M02	Yang et al., 2004	Yes	122.6	120.48	37.42	-15.2	48.15	0.86	14.14	8.388	0.17	10.23	8.84	1.71	1.36	0.15	5.31	100.24
DK-M07	Yang et al., 2004	Yes	132.5	120.48	37.42	-17.1	51.75	0.82	14.92	6.147	0.12	6.5	6.8	2.84	2.18	0.29	7.01	100.06
DK-M04	Yang et al., 2004	Yes	132.5	120.48	37.42	-14.7	44.08	0.76	13.28	7.29	0.24	9.35	8.86	1.72	1.2	0.35	12.03	99.97
QT-9	Yang et al., 2008	Yes	134	118.4	35.42	-13.41	56.37	0.8	16.13	5.778	0.08	5.63	6.46	3.76	3.07	0.52	0.33	99.55
QT-6	Yang et al., 2008	Yes	129	118.4	35.42	-13.04	53.9	0.98	18.02	6.597	0.09	4.65	6.54	3.93	3.42	0.7	0.07	99.63
QT-5	Yang et al., 2008	Yes	129	118.4	35.42	-14.86	54.6	0.97	15.73	6.786	0.1	5.9	7.26	3.4	3.28	0.56	0.16	99.5
QT-19	Yang et al., 2008	Yes	134	118.4	35.42	-14.97	49.1	1.42	6.24	10.089	0.17	13.09	12.98	1.14	2.51	0.79	1.01	99.66
QT-17	Yang et al., 2008	Yes	134	118.4	35.42	-16.6	57.62	0.87	17.08	5.463	0.07	3.52	5.11	4	3.73	0.57	0.92	99.54
QT-14	Yang et al., 2008	Yes	134	118.4	35.42	-13.17	50.12	1.41	17.59	8.199	0.1	5.84	7.45	3.56	3.24	0.86	0.48	99.76
QT-1	Yang et al., 2008	Yes	129	118.4	35.42		53.2	1.05	15.79	6.921	0.1	6.37	8.42	3.33	3.04	0.68	0.15	99.82
07ZP09	Yang et al., 2012a	Yes	131	117.74	36.86	-14	53.79	0.91	15.55	8.622	0.15	5.22	6.97	3.47	2.18	0.35	1.76	99.93
07ZP08	Yang et al., 2012a	Yes	130	117.74	36.86	-14.9	53.42	0.85	15.09	8.397	0.15	5.64	6.84	3.49	2.4	0.36	1.92	99.49
07ZP07	Yang et al., 2012a	Yes	123	117.74	36.86	-10.4	51.33	0.73	11.76	8.523	0.16	11.74	7.52	2.51	2.03	0.31	2.02	99.58
07ZP06	Yang et al., 2012a	Yes	130	117.74	36.86	-13.5	53.73	0.94	15.39	8.739	0.15	5.3	6.94	3.46	2.1	0.35	1.7	99.77
07ZP03	Yang et al., 2012a	Yes	120	117.74	36.86	-10.5	51.03	0.71	11.43	8.874	0.16	12.46	7.72	2.4	1.85	0.29	1.83	99.74
07ZP02	Yang et al., 2012a	Yes	123	117.74	36.86	-13	53.38	0.92	15.2	8.667	0.15	5.34	7.01	3.4	2.13	0.34	2.03	99.53
07JN40	Yang et al., 2012a	Yes	125	116.75	36.55	-9.5	48.68	0.5	12.99	9.063	0.18	12.11	9.45	2.11	0.6	0.1	2.84	99.62
07JN39	Yang et al., 2012a	Yes	125	116.75	36.55	-6.9	47.69	0.44	12.21	8.811	0.17	14.39	9.72	1.82	0.55	0.08	2.92	99.78
07JN38	Yang et al., 2012a	Yes	125	116.75	36.55	-9.7	48.85	0.44	12.59	8.901	0.17	13.55	9.09	1.94	0.53	0.08	2.38	99.51
07JN36	Yang et al., 2012a	Yes	119	116.75	36.55	-10	50.16	0.45	13.49	8.523	0.17	11.51	9.44	2.12	0.54	0.08	2.16	99.59
07JN35	Yang et al., 2012a	Yes	120	116.75	36.55		51.91	0.67	14.08	8.955	0.17	9.28	8.71	2.54	1.14	0.16	1.19	99.79
07JN32	Yang et al., 2012a	Yes	120	116.75	36.55		52.09	0.7	14.3	8.253	0.15	8.38	8.07	2.9	1.23	0.19	2.39	99.57
07JN30	Yang et al., 2012a	Yes	119	116.75	36.55	-10.8	49.97	0.6	16.19	8.775	0.16	8.01	8.92	2.79	0.6	0.11	2.64	99.75
07JN29	Yang et al., 2012a	Yes	119	116.75	36.55	-13.9	50.93	0.72	18.11	8.397	0.16	5.73	8.02	3.43	0.52	0.21	2.49	99.64
07JN26	Yang et al., 2012a	Yes	119	116.75	36.55	-11.6	48.71	0.36	15.62	8.532	0.16	9.66	9.8	2.45	0.39	0.06	2.87	99.56
07JN25	Yang et al., 2012a	Yes	119	116.75	36.55	-12.3	49.62	0.41	16.31	7.992	0.15	9.34	9.73	2.48	0.38	0.05	2.26	99.62
07JN22	Yang et al., 2012a	Yes	119	116.75	36.55	-10.6	47.46	0.45	13.07	10.116	0.18	12.39	10.02	1.83	0.35	0.06	2.72	99.77
07JN21	Yang et al., 2012a	Yes	119	116.75	36.55	-12.6	48.45	0.52	15.31	9.801	0.19	9.92	9.97	2.32	0.23	0.05	1.88	99.72
07JN20	Yang et al., 2012a	Yes	128	116.75	36.55		52.45	0.78	14.71	8.865	0.18	7.61	7.74	2.99	1.32	0.21	1.97	99.8
07JN19	Yang et al., 2012a	Yes	119	116.75	36.55	-10.3	47.63	0.26	12.8	9.477	0.19	13.4	10.4	1.61	0.24	0.04	2.48	99.57
07JN16	Yang et al., 2012a	Yes	119	116.75	36.55	-10.5	48.19	0.33	14.06	9.171	0.17	12.02	10.61	1.83	0.27	0.03	1.95	99.65
07JN14	Yang et al., 2012a	Yes	119	116.75	36.55	-10	47.77	0.37	8.62	10.782	0.22	16.09	10.97	1.11	0.29	0.05	2.04	99.51
07JN13	Yang et al., 2012a	Yes	119	116.75	36.55	-10	48.14	0.27	13.8	8.982	0.17	12.78	10.26	1.74	0.32	0.05	2.12	99.63
07JN08	Yang et al., 2012a	Yes	119	116.75	36.55	-13.1	49.2	0.74	17.41	8.829	0.14	7.61	9.68	2.66	0.29	0.06	2.3	99.89
07JN05	Yang et al., 2012a	Yes	119	116.75	36.55	-12.5	49.27	0.67	13.72	10.962	0.22	11.27	10.19	2.03	0.21	0.07	0.23	100.06
07JN03	Yang et al., 2012a	Yes	119	116.75	36.55	-16.3	48.12	0.72	13.68	10.971	0.19	11.24	10.49	1.98	0.34	0.04	0.78	99.77
07ZB04	Yang et al., 2012b	Yes	134	117.86	36.49	-6.6	53.88	1.01	12.75	7.884	0.13	8.19	6.34	3.38	1.89	0.35	2.31	98.99
07ZB03	Yang et al., 2012b	Yes	134	117.86	36.49	-5	52.02	1.02	12.09	8.415	0.15	9.2	6.77	2.99	2.32	0.39	3.11	99.41
07ZB02	Yang et al., 2012b	Yes	136	117.86	36.49	-6.4	53.15	1.06	12.46	8.559	0.14	9.07	6.87	3.25	1.65	0.39	2.03	99.58
07ZB01	Yang et al., 2012b	Yes	131	117.86	36.49	-5.4	53.31	0.98	12.1	8.019	0.14	9.05	6.71	3.22	1.96	0.4	2.47	99.25
07YN09	Yang et al., 2012b	Yes	131	118.47	35.55	-13.4	51.54	1.15	14.31	7.479	0.14	7.79	8.68	3.09	2.76	0.67	1.09	99.53
07YN08	Yang et al., 2012b	Yes	131	118.47	35.55	-16.1	52.01	1.14	15.4	7.182	0.13	6.15	7.88	3.47	3.05	0.66	1.25	99.12
07YN05	Yang et al., 2012b	Yes	131	118.47	35.55	-14	54.46	0.86	18.78	5.283	0.09	4.1	6.61	4.09	2.78	0.54	1.69	99.87
07YN02	Yang et al., 2012b	Yes	131	118.47	35.55	-15.8	52.36	1.01	14.94	6.858	0.13	7.23	7.75	3.26	2.74	0.64	1.88	99.56
07LW05	Yang et al., 2012b	Yes	134	117.66	36.2	-9.1	48.02	0.56	12.22	9.747	0.2	14.2	9.82	0.91	0.08	0.11	2.03	98.98
07LW03	Yang et al., 2012b	Yes	133	117.66	36.2	-6.6	54.32	0.8	14.43	7.677	0.15	8.36	7.25	2.84	1.81	0.19	0.78	99.46
07LW01	Yang et al., 2012b	Yes	134	117.66	36.2	-6.3	47.43	0.66	11.03	9.999	0.19	14.94	10.01	1.44	0.17	0.07	2.21	99.26
ZWZ09	Ying et al., 2005	Yes	119	117.65	36.2	-14.4	57.5	0.63	16.4	6.417	0.14	3.29	3.93	4.85	2.83	0.22	2.71	99.62
ZWZ08	Ying et al., 2005	Yes	127	117.63	36.75	-15.3	50.9	0.66	16.6	8.145	0.18	5.12	5.84	5.31	0.9	0.25	5.46	100.3
YQS-4	Ying et al., 2005	Yes	127	117.63	36.75		53.9	0.8	14	8.226	0.11	7.49	8.4	2.66	2	0.38	1.47	99.83
YQS-2	Ying et al., 2005	Yes	127	117.63	36.75	-16.1	53.7	1.01	15.2	8.811	0.11	5.58	7.43	2.77	2.1	0.48	1.86	99.59
YQS-1	Ying et al., 2005	Yes	127	117.63	36.75	-15.1	53.6	1.02	15.4	8.793	0.12	5.54	7.81	3.24	1.92	0.5	1.29	99.82
WNS-9	Ying et al., 2005	Yes	127	117.63	36.75		54.6	0.9	14.6	7.704	0.12	6.67	7.22	3.01	2.75	0.43	1.58	100.04
WNS-8	Ying et al., 2005	Yes	127	117.63	36.75		55	0.89	14.7	7.452	0.11	6.5	7.43	2.92	2.47	0.43	1.05	99.8
WNS-7	Ying et al., 2005	Yes	127	117.63	36.75	-15.9	54.4	0.93	14.7	8.253	0.11	6.34	7.4	2.95	2.15	0.48	1.76	99.81
WNS-5	Ying et al., 2005	Yes	127	117.63	36.75	-16.1	55.8	0.89	15	7.272	0.08	5.92	7.38	3.2	1.73	0.46	1.73	99.9
WNS-4	Ying et al., 2005	Yes	127	117.63	36.75	-11.7	54.5	0.74	14.3	8.883	0.11	6.79	8.03	2.55	1.3	0.27	1.98	99.99
WNS-3	Ying et al., 2005	Yes	127	117.63	36.75	-14.1	55.1	0.75	14.4	8.01	0.12	6.99	8.12	2.78	1.33	0.31	1.32	99.63
WNS-2	Ying et al., 2005	Yes	127	117.63	36.75	-11.8	53.5	0.71	13.9	8.595	0.12	8.26	8.5	2.49	1.69	0.26	1.42	99.9
WNS-1	Ying et al., 2005	Yes	127	117.63	36.75	-17	53.6	0.89	15.7	8.559	0.11	5.98	8.36	2.9	1.53	0.51	1.23	99.92
PY-4	Ying et al., 2005	Yes	120	117.64	35.51	-11.4	57	0.81	16.9	5.778	0.05	3.46	4.8	3.92	4.03	0.42	2.06	99.86
PY-3	Ying et al., 2005	Yes	120	117.64	35.51	-12.5	53.4	1.02	14.7	7.2	0.16	5.18	7.66	3.28	3.64	0.85	1.6	99.5
PY-2	Ying et al., 2005	Yes	120	117.64	35.51	-15.3	54.4	0.91	14.8	5.607	0.1	5.46	7.9	3.63	3.45	0.72	2.13	99.68
PY-1	Ying et al., 2005	Yes	120	117.64	35.51	-13	54.9	0.98	16.5	6.399	0.11	3.98	5.55	3.75	4.23	0.8	1.97	99.8
My-9	Ying et al., 2005	Yes	119	117.65	36.2	-15.5	58.4	0.73	15.6	3.942	0.19	4.63	5.47	3.89	3.96	0.51	2.07	99.82
My-8	Ying et al., 2005	Yes	119	118.04	36.69	-15.2	55.9	1.09	15.2	5.463	0.07	5.26	6.75	3.31	3.32	0.63	1.92	99.54
My-3	Ying et al., 2005	Yes	119	118.04	36.69	-14.5	51.3	1.08	15.5	7.11	0.15	6.14	7.99	3.13	3.23	0.86	2.32	99.53
My-1*	Ying et al., 2005	Yes	119	118.04	36.69	-16.4	54.5	1.28	16.6	6.552	0.08	3.9	6.11	3.99	3.04	0.78	0.96	97.79
My-1	Ying et al., 2005	Yes	119	118.04	36.69	-15.9	60.3	0.62	12.8	4.473	0.1	3.15	7.32	3.1	3.95	0.31	3.26	99.81
M04-1*	Ying et al., 2005	Yes	119	118.04	36.69		51.3	1.15	15	7.542	0.08	5.78	9.24	2.69	2.47	0.86	0.82	96.93
GJL05	Ying et al., 2005	Yes	127	117.63	36.75	-15	59.5	0.69	16.1	6.156	0.21	2.33	3.72	4.1	3.44	0.27	2.36	99.63
GJL03	Ying et al., 2005	Yes	127	117.63	36.75		56.7	0.56	14.4	6.957	0.16	5.94	5.65	3.13	2.37	0.2	3.58	100
ZJS15	Ying et al., 2007	Yes	127.2	110.99	37.95	0.1	51.4	1.15	18.1	4.644	0.11	0.69	4.79	5.05	11.9	0.16	1.92	100.5
ZJS08	Ying et al., 2007	Yes	127.2	110.99	37.95	0.3	53.2	0.81	18.2	4.167	0.11	0.81	4.46	2.54	12.4	0.1	2.26	99.4
ZJS03	Ying et al., 2007	Yes	127.2	110.99	37.95	-5.8	53.3	0.99	13.9	8.874	0.17	3.51	7.73	2.6	6.07	0.62	0.6	99.4
ZJS02	Ying et al., 2007	Yes	127.2	110.99	37.95		58.3	0.79	16.6	5.553	0.16	1.59	5.28	5.07	5.34	0.22	0.37	99.9
ZJS01	Ying et al., 2007	Yes	127.2	110.99	37.95		59.6	0.59	18.1	4.464	0.14	0.92	4.26	6.18	4.25	0.21	0.77	99.9
03ZJS13	Ying et al., 2007	Yes	127.2	110.99	37.95	-7.8	55	0.91	15.5	7.992	0.16	2.52	7.12	3.29	5.03	0.51	0.43	99.4
03ZJS12	Ying et al., 2007	Yes	127.2	110.99	37.95	-0.2	55.3	0.55	19	3.654	0.08	0.47	2.48	4.25	12.1	0.16	1.18	99.6
03ZJS09	Ying et al., 2007	Yes	127.2	110.99	37.95	-5.6	53	0.97	14.6	8.559	0.17	3.02	7.12	2.88	6.86	0.56	0.53	99.2
03ZJS07	Ying et al., 2007	Yes	127.2	110.99	37.95	-3.7	53.5	0.97	15.6	7.389	0.19	1.6	4.94	4.59	8.6	0.28	0.87	99.4
03ZJS06	Ying et al., 2007	Yes	127.2	110.99	37.95	-3.5	53.5	0.98	15.7	7.479	0.17	1.82	5.24	4.4	8.43	0.31	0.65	99.5
03ZJS01	Ying et al., 2007	Yes	127.2	110.99	37.95	-11.6	61.4	0.46	17.9	4.671	0.07	1.02	3.79	4.78	3.89	0.21	0.95	99.7
DT-40	Yuan et al., 2006	Yes	137.1	115.9	39.97		55.24	1.21	17.82	7.245	0.09	3.14	4.3	6.17	1.99	0.42	2.22	100.65
DT-39	Yuan et al., 2006	Yes	137.1	115.9	39.97		58.03	0.79	18.18	6.048	0.08	2.29	5.61	4.17	2.66	0.42	1.15	100.1
DT-38	Yuan et al., 2006	Yes	137.1	115.9	39.97		58.18	0.77	17.91	5.904	0.11	2.29	5.25	3.56	3.36	0.41	1.48	99.88
DT-37	Yuan et al., 2006	Yes	137.1	115.9	39.97		66.15	0.48	16.77	3.393	0.08	1.32	2.4	5.13	3.75	0.2	1.07	101.12
DT-36	Yuan et al., 2006	Yes	137.1	115.9	39.97		55.3	1.01	16.45	7.029	0.12	4.81	6.05	3.99	1.86	0.34	2.53	100.27
DT-35	Yuan et al., 2006	Yes	137.1	115.9	39.97		57.35	0.82	17.91	6.282	0.12	2.5	5.16	4.41	2.74	0.51	1.88	100.38
DT-34	Yuan et al., 2006	Yes	137.1	115.9	39.97		56.34	0.87	18.51	6.444	0.13	2.64	4.83	5.47	2.46	0.53	2.04	100.98
DT-33	Yuan et al., 2006	Yes	137.1	115.9	39.97		58.14	1.11	16.63	6.561	0.1	2.19	4.81	3.32	4.52	0.55	1.29	99.95
DT-32	Yuan et al., 2006	Yes	137.1	115.9	39.97		51.15	1.28	17.48	8.127	0.15	4.96	6.54	3.31	3.02	0.36	2.94	100.22
DT-31	Yuan et al., 2006	Yes	137.1	115.9	39.97		51.57	1.1	17.54	7.938	0.12	5.61	7.89	3.27	1.94	0.33	2.08	100.27
DT-28	Yuan et al., 2006	Yes	137.1	115.9	39.97		61.31	0.63	16.89	4.77	0.09	2.55	3.4	4.56	3.76	0.24	1.71	100.44
DT-26	Yuan et al., 2006	Yes	137.1	115.9	39.97		53.26	1.01	16.48	7.281	0.13	4.81	6.75	3.42	1.86	0.34	4.19	100.34
DT-25	Yuan et al., 2006	Yes	137.1	115.9	39.97		70.24	0.65	13.29	3.663	0.06	1.27	2.59	2.97	2.91	0.18	2.84	101.07
DT-24	Yuan et al., 2006	Yes	137.1	115.9	39.97		53.96	1.05	17.16	7.488	0.1	5.4	7.01	3.69	1.46	0.35	2.61	101.11
DT-19	Yuan et al., 2006	Yes	137.1	115.9	39.97		50.75	1.1	17.25	8.289	0.13	5.27	5.01	4.39	2.41	0.35	2.94	98.81
DT-17	Yuan et al., 2006	Yes	137.1	115.9	39.97	-17.09	55.93	0.86	18.81	6.561	0.12	2.8	5.66	4.04	3.03	0.44	1.61	100.59
DT-16	Yuan et al., 2006	Yes	137.1	115.9	39.97	-15.66	63.72	0.68	14.94	5.31	0.08	1.54	4.89	3.91	1.88	0.34	2.07	99.95
DT-15	Yuan et al., 2006	Yes	137.1	115.9	39.97	-16.02	60.83	0.59	17.45	5.085	0.1	2.15	4	4.72	2.68	0.34	1.59	100.1
DT-12	Yuan et al., 2006	Yes	137.1	115.9	39.97		58.71	1.14	17.13	6.291	0.08	2.42	4.68	3.37	4.11	0.55	1.49	100.67
DT-11	Yuan et al., 2006	Yes	137.1	115.9	39.97	-13.03	56.67	0.84	17.87	6.183	0.14	2.6	4.93	4.23	2.76	0.51	2.55	99.97
DT-09	Yuan et al., 2006	Yes	137.1	115.9	39.97		58.61	0.66	17.84	5.616	0.1	2.73	3.68	4.54	3.28	0.34	2.14	100.16
DT-06	Yuan et al., 2006	Yes	137.1	115.9	39.97	-22.06	60.23	0.83	15.93	6.183	0.1	3.23	4.01	4.1	2.4	0.3	2.45	100.45
DT-05	Yuan et al., 2006	Yes	137.1	115.9	39.97	-14.28	60.45	0.71	16.68	5.337	0.11	2.83	4.22	4.81	2.34	0.26	2.01	100.35
JG-09	Zhang and Zheng, 2003	Yes	100.4	121.66	42.01	4.1	44.82	2.93	14.81	10.575	0.17	8.3	10.62	3.03	1.78	0.63	1.17	100
JG-08	Zhang and Zheng, 2003	Yes	100.4	121.66	42.01	4.3	45.5	2.85	14.37	10.359	0.17	8.16	10.27	3.09	1.87	0.63	1.52	99.9
JG-07	Zhang and Zheng, 2003	Yes	100.4	121.66	42.01	4.4	43.4	2.95	14.88	10.602	0.17	8.39	10.32	3.33	1.91	0.66	1.34	99.1
JG-06	Zhang and Zheng, 2003	Yes	100.4	121.66	42.01	4.2	46.07	2.88	14.36	10.242	0.17	8.06	10.07	3.18	1.8	0.63	1.47	100.1
JG-05	Zhang and Zheng, 2003	Yes	100.4	121.66	42.01	4.5	45.01	2.95	14.59	10.602	0.17	8.3	10.32	3.33	1.91	0.66	1.38	100.4
JG-04	Zhang and Zheng, 2003	Yes	100.4	121.66	42.01	4.4	45.92	2.85	14.27	10.233	0.17	8.09	10.11	3.03	1.8	0.62	1.57	99.8
JG-03	Zhang and Zheng, 2003	Yes	100.4	121.66	42.01	4.1	44.82	2.93	14.81	10.512	0.17	8.38	10.52	3	1.93	0.65	1.25	100.1
JG-02	Zhang and Zheng, 2003	Yes	100.4	121.66	42.01	3.9	45.48	2.89	14.51	10.359	0.17	8.25	10.34	2.7	1.93	0.62	1.55	100
JG-01	Zhang and Zheng, 2003	Yes	100.4	121.66	42.01	4.8	44.84	2.92	14.79	10.413	0.17	8.31	10.27	3.19	1.88	0.64	1.33	99.9
FC7	Zhang et al., 2002	Yes	124.9	118.2	35.3	-14.4	48.47	1.11	12.68	8.23	0.1	11.46	9.77	2.67	0.92	0.79	3.59	99.8
FC6–2	Zhang et al., 2002	Yes	124.9	118.2	35.3	-13.9	47.62	1.14	13.01	7.77	0.11	11.38	9.94	2.71	1.01	0.88	4.07	99.6
FC6–1	Zhang et al., 2002	Yes	124.9	118.2	35.3	-14.1	47.96	1.1	13.11	7.79	0.12	11.18	10.03	3.03	1.05	0.81	3.85	100
FC5–1	Zhang et al., 2002	Yes	124.9	118.2	35.3	-14.2	48.7	1.09	12.86	7.82	0.12	11.77	9.64	2.49	0.93	0.79	3.61	99.8
FC1–2	Zhang et al., 2002	Yes	124.9	118.2	35.3	-13.4	49.36	1.11	14.42	8.07	0.12	8.29	8.73	2.96	1.58	0.92	3.82	99.4
FC1–1	Zhang et al., 2002	Yes	124.9	118.2	35.3	-13.1	49.62	1.12	14.76	7.49	0.12	8.09	8.79	3.16	1.59	0.94	4.22	99.9
WLHD-06	Zhang et al., 2003	Yes	142.4	121.52	41.95	-6.31	57.07	1.01	13.4	6.651	0.11	7.52	6.62	3.39	1.69	0.28	1.85	100.3
WLHD-05	Zhang et al., 2003	Yes	142.4	121.52	41.95	-6.65	55.32	1.06	14.24	6.993	0.11	7.91	6.88	3.52	1.76	0.3	1.63	100.5
WLHD-04	Zhang et al., 2003	Yes	142.4	121.52	41.95	-6.77	53.7	1.09	14.63	7.155	0.11	8.28	6.9	3.65	1.87	0.32	1.5	100
WLHD-03	Zhang et al., 2003	Yes	142.4	121.52	41.95	-6.63	55	1.05	14.35	6.903	0.11	8.05	6.65	3.55	1.82	0.29	1.56	100.1
WLHD-02	Zhang et al., 2003	Yes	142.4	121.52	41.95	-5.96	52.47	1.08	14.8	7.119	0.12	8.27	7.01	3.71	1.89	0.3	1.66	99.2
WLHD-01	Zhang et al., 2003	Yes	142.4	121.52	41.95	-6.05	52.96	1.11	14.8	7.218	0.11	8.06	7.28	3.68	1.84	0.31	1.53	99.7
NTS-09	Zhang et al., 2003	Yes	100.5	119.12	41.97	1.53	55.51	1.1	15.51	6.705	0.1	4.24	5.93	3.98	2.57	0.57	2.41	99.4
NTS-08	Zhang et al., 2003	Yes	100.5	119.12	41.97	1.85	51.3	1.74	17.04	6.435	0.12	5.2	5.98	5.41	2.98	0.82	2.79	100.5
NTS-07	Zhang et al., 2003	Yes	100.5	119.12	41.97	1.65	47.98	1.87	18.43	6.795	0.13	5.49	6.27	5.9	3.47	0.89	2.64	100.6
NTS-06	Zhang et al., 2003	Yes	100.5	119.12	41.97	1.69	48.66	1.85	18.22	6.732	0.13	5.85	6.52	4.82	3.26	0.87	3.09	100.8
NTS-05	Zhang et al., 2003	Yes	100.5	119.12	41.97	4.71	48.53	1.82	18.01	6.732	0.12	5.79	6.44	4.75	3.25	0.86	3.18	100.2
NTS-04	Zhang et al., 2003	Yes	100.5	119.12	41.97	3.92	48.81	1.79	17.4	6.516	0.12	5.87	6.29	4.67	3.1	0.85	3.25	99.4
NTS-03	Zhang et al., 2003	Yes	100.5	119.12	41.97	2.95	49.26	1.79	17.49	6.606	0.12	5.62	6.44	4.66	3.09	0.85	3.46	100.1
NTS-02	Zhang et al., 2003	Yes	100.5	119.12	41.97	1.7	48.87	1.86	18.21	6.822	0.13	5.34	6.43	5.34	3.47	0.88	2.67	100.8
NTS-01	Zhang et al., 2003	Yes	100.5	119.12	41.97	1.84	50.4	1.71	16.83	6.264	0.12	5.6	6.05	4.41	2.97	0.82	3.37	99.2
GCS-06	Zhang et al., 2003	Yes	134.6	121.6	42.05	-9	63.53	0.7	15.49	4.59	0.08	2.44	4.54	3.5	2.39	0.21	1.44	99.4
GCS-05	Zhang et al., 2003	Yes	134.6	121.6	42.05	-8.73	60.82	0.77	17.14	5.373	0.1	2.73	5.14	3.9	2.64	0.23	0.91	100.4
GCS-04	Zhang et al., 2003	Yes	134.6	121.6	42.05	-8.69	61.8	0.74	16.32	5.013	0.09	2.57	4.9	3.72	2.48	0.22	1.5	99.9
GCS-03	Zhang et al., 2003	Yes	134.6	121.6	42.05	-8.76	60.37	0.77	16.77	5.319	0.09	2.71	5.04	3.8	2.53	0.22	1.3	99.5
GCS-02	Zhang et al., 2003	Yes	134.6	121.6	42.05	-8.41	60.31	0.77	16.89	5.391	0.09	2.83	5.09	3.92	2.63	0.23	1.81	100.6
GCS-01	Zhang et al., 2003	Yes	134.6	121.6	42.05	-8.49	61.84	0.74	16.22	5.013	0.09	2.64	4.83	3.75	2.52	0.22	1.77	100.2
PSK03-8	Zhang et al., 2008	No	86	120.4	36.31	2.9	41.12	2.49	11.73	14.67	0.26	9.57	9.56	3.02	1.95	1.24	4.2	99.81
PSK03-4	Zhang et al., 2008	No	86	120.4	36.31	2.8	41.01	2.52	12	14.46	0.2	9.86	9.23	3.01	1.84	1.13	4.38	99.64
PSK03-10	Zhang et al., 2008	No	86	120.4	36.31	3.4	40.83	2.54	11.93	14.53	0.22	9.6	9.46	3.03	1.87	1.16	4.49	99.66
04PSK-7	Zhang et al., 2008	No	77	120.4	36.31	3.8	39.6	3.05	12.22	15.46	0.21	8.09	10.03	2.51	2.33	1.05	5.25	99.8
04PSK-6	Zhang et al., 2008	No	77	120.4	36.31	2.7	40.24	2.54	11.58	14.25	0.31	9.29	10.2	3.01	1.98	1.18	5.18	99.76
04PSK-5	Zhang et al., 2008	No	77	120.4	36.31	3.1	40.11	2.64	11.66	14.79	0.3	8.55	10.39	3.12	1.98	1.26	4.95	99.75
Sm3	Zhang et al., 2010	Yes	116.83	121.28	37.13		53.35	0.91	18.04	6.98	0.11	4.09	6.68	3.79	3.1	0.54	2.12	100
Sm2	Zhang et al., 2010	Yes	116.83	121.28	37.13		52.7	0.9	17.14	7.779	0.11	5.04	5.71	3.72	3.06	0.5	2.87	99.87
Sm1	Zhang et al., 2010	Yes	116.83	121.28	37.13		49.5	0.82	15.48	7.927	0.15	8.08	8.91	3.33	1.96	0.43	3.06	99.91
Pm9	Zhang et al., 2010	Yes	116.83	121.28	37.13		58.44	0.75	16.51	5.475	0.08	3.82	4.19	3.71	3.66	0.39	2.77	100
Pm8	Zhang et al., 2010	Yes	116.83	121.28	37.13		53.05	0.74	14.68	6.99	0.13	7.13	8.61	3.54	2.73	0.43	1.44	99.74
Pm7	Zhang et al., 2010	Yes	116.83	121.28	37.13		55.25	0.73	15.58	6.519	0.11	6.09	6.85	3.53	2.93	0.37	1.48	99.69
Pm5	Zhang et al., 2010	Yes	116.83	121.28	37.13		52.6	0.77	13.45	9.052	0.13	7.39	7.47	3.36	2.5	0.4	2.3	99.88
Pm4	Zhang et al., 2010	Yes	116.83	121.28	37.13		51.4	0.9	16.59	8.529	0.12	5.52	7.3	3.37	3.38	0.5	2.1	99.74
Pm3	Zhang et al., 2010	Yes	116.83	121.28	37.13		57.77	0.71	15.83	5.506	0.07	4.46	4.62	4	3.81	0.43	2.38	99.88
Pm1	Zhang et al., 2010	Yes	116.83	121.28	37.13		50.5	0.83	14.04	7.384	0.12	8.61	9.57	3.21	2.35	0.5	2.4	99.77
BP18	Zhang et al., 2010	Yes	116.83	121.28	37.13		50.05	0.83	14.74	6.595	0.1	3.29	5.69	2.2	4.39	0.73	10.6	99.51
BP17	Zhang et al., 2010	Yes	116.83	121.28	37.13		54.21	0.53	9.85	7.449	0.1	3.77	6.24	1.05	3.08	0.52	13.1	100.1
BP16	Zhang et al., 2010	Yes	116.83	121.28	37.13		55.81	0.96	17.18	7.63	0.08	3.15	5.67	2.71	3.87	0.7	1	99.52
BP15	Zhang et al., 2010	Yes	116.83	121.28	37.13		58.84	0.76	16.14	6.421	0.07	3.76	4.11	3.09	3.1	0.6	1.98	99.49
BP13	Zhang et al., 2010	Yes	116.83	121.28	37.13		54.7	0.75	14.12	6.42	0.09	5.56	7.25	3.19	2.81	0.75	3.31	99.61
BP12	Zhang et al., 2010	Yes	116.83	121.28	37.13		56.97	0.7	14.17	7.32	0.11	5.65	5.59	2.59	3.05	0.75	2.01	99.51
BP11	Zhang et al., 2010	Yes	116.83	121.28	37.13		57.01	0.69	14.38	7.117	0.11	5.17	5.75	2.71	3.12	0.72	2.14	99.79
00XHY04	Zhang et al., 2012	No	123	119.23	35.42	-13.6	48.69	1.42	14.32	8.424	0.15	9.44	7.61	2.94	2.64	0.55	2.43	99.55
00SD47	Zhang et al., 2012	No	123	119.23	35.42	-14.9	51.49	0.6	12.15	6.66	0.18	7.23	16.41	1.83	0.38	0.45	0.47	98.59
00SD03	Zhang et al., 2012	No	123	119.23	35.42	-14.9	47.75	1.07	13.61	8.46	0.07	8.29	5.49	5.2	0.76	0.53	8.25	100.42
00DP01	Zhang et al., 2012	No	129	119.23	35.42	-15	50.02	0.98	12.91	7.488	0.15	11.28	7.42	2.24	3.82	0.69	0.87	98.7
SYb-7	Zhang et al., 2019	Yes	130	110.59	34.68		50.43	0.46	9.26	10.143	0.2	11.7	10.78	1.93	0.99	0.29	2.32	99.63
SYb-6R	Zhang et al., 2019	Yes	130	110.59	34.68		46.38	0.95	13.28	11.421	0.29	10.17	8.7	2.33	1.9	0.33	2.69	99.71
SYb-6	Zhang et al., 2019	Yes	130	110.59	34.68		46.36	0.95	13.28	11.403	0.29	10.13	8.69	2.35	1.91	0.34	2.67	99.64
SYb-5	Zhang et al., 2019	Yes	130	110.59	34.68		42.25	1.27	14.39	12.888	0.25	11.71	7.18	1.94	2.54	0.1	3.56	99.51
SYb-4	Zhang et al., 2019	Yes	130	110.59	34.68		45.93	1.37	13.09	14.256	0.19	6.93	10.56	3.11	1.1	0.18	1.29	99.59
SYb-3	Zhang et al., 2019	Yes	130	110.59	34.68		47.83	0.92	12.41	13.374	0.23	8.11	10	3.07	1.27	0.09	0.75	99.54
SYb-2	Zhang et al., 2019	Yes	130	110.59	34.68		51.04	1.07	14.34	10.773	0.25	6.65	8.01	3.43	1.28	0.14	1.66	99.84
SYb-1	Zhang et al., 2019	Yes	130	110.59	34.68		46.68	3.42	12.25	15.705	0.37	5.87	8.76	2.92	1.07	0.23	0.52	99.54
01SHC12	Zhao et al., 2005	No	125	116.25	30.83		54.9	1.03	9.99	8.014	0.13	11.96	7.06	2.11	1.94	0.23	2.05	99.64
01SHC10	Zhao et al., 2005	No	125	116.25	30.83		52.01	1.19	12.72	8.047	0.12	10.83	6.82	2.75	2.16	0.4	2.27	99.53
01SHC09	Zhao et al., 2005	No	125	116.25	30.83		44.45	1.59	6.23	16.082	0.2	14	12.33	1.07	0.74	0.12	2.25	99.74
01SHC01	Zhao et al., 2005	No	125	116.25	30.83		64.27	0.66	15.34	4.291	0.08	2.32	3.87	3.84	3.37	0.25	1.03	99.52
01SHC11	Zhao et al., 2005	No	125	116.25	30.83		51.83	1.17	11.91	8.822	0.12	11.22	6.86	2.56	2.08	0.47	2.1	99.4
01SC03	Zhao et al., 2005	No	125	116.25	30.83		48.92	1.58	10.94	10.307	0.14	13.66	5.73	1.62	3.25	0.13	2.98	99.55
TH9–2	Zhou et al., 2021	Yes	130	126.7	42.05	-5.29	57.9	1.03	16.2	6.309	0.06	2.35	4.63	4.51	3.43	0.29	2.53	99.8
TH8–4	Zhou et al., 2021	Yes	130	126.7	42.05	-3.2	64.1	0.59	14.9	3.618	0.08	2.02	4.64	3.49	3.65	0.22	2.12	99.7
TH8–36	Zhou et al., 2021	Yes	130	126.7	42.05	-3.31	55.2	1.65	17.8	6.66	0.07	2.32	6.36	3.82	2.89	0.52	1.69	99.2
TH8–35	Zhou et al., 2021	Yes	130	126.7	42.05	-5.2	53	1.67	18	5.859	0.1	1.48	6.75	3.85	3.58	0.52	4.17	99.2
TH8–25	Zhou et al., 2021	Yes	130	126.7	42.05	-2.98	63.6	0.64	14.9	3.276	0.1	1.64	5.53	3.29	3.64	0.22	2.48	99.5
TH1–6	Zhou et al., 2021	Yes	132	126.7	42.05	-15.08	53.2	1.99	16.2	9.72	0.09	2.64	6.97	3.76	2.34	0.59	1.04	99.2
TH1–4	Zhou et al., 2021	Yes	132	126.7	42.05	-18.91	54.2	1.45	17.1	8.01	0.04	4.06	3.83	3.8	3.19	0.44	3	99.7
TH1–11	Zhou et al., 2021	Yes	132	126.7	42.05	-7.09	46.7	2.15	17.6	11.25	0.09	4.56	6.75	3.38	1.23	0.72	4.09	99.1
17PL4–1	Zhou et al., 2021	Yes	132	126.7	42.05	-6.79	51.29	1.98	16.78	8.694	0.15	2.5	6.46	4.24	2.73	0.69	3.03	99.49
17PJ8–1	Zhou et al., 2021	Yes	129	125.36	41.27	-10.1	52.78	0.94	17.11	7.416	0.12	4.18	7.5	2.7	2.02	0.26	4.26	100.11
17PJ2–8	Zhou et al., 2021	Yes	132	126.7	42.05		58.88	1.1	16.87	4.716	0.08	1.79	4.9	4.07	3.92	0.49	2.55	99.89
17PJ2–7	Zhou et al., 2021	Yes	132	126.7	42.05	-9.3	58.47	1.09	16.84	4.887	0.08	1.89	5.15	4.1	3.9	0.49	2.18	99.63
17PJ19–4	Zhou et al., 2021	Yes	130	121.53	38.95		57.26	0.74	16.86	5.787	0.08	2.99	7.05	3.37	1.64	0.15	3.21	99.79
17PJ17–2	Zhou et al., 2021	Yes	129	124.4	40.35	-15.45	54.56	0.81	16.18	6.795	0.1	4.62	6.86	2.54	2.16	0.21	4.7	100.29
17PJ16–3	Zhou et al., 2021	Yes	129	124.4	40.35		54.64	0.91	17.04	7.101	0.1	4.43	7.14	3.13	1.9	0.25	1.9	99.33
17PJ15–1	Zhou et al., 2021	Yes	129	124.4	40.35		60.4	0.75	16.61	5.121	0.08	2.82	5.93	2.71	3.03	0.17	1.99	100.17
17PJ1–2	Zhou et al., 2021	Yes	132	126.7	42.05	-9.58	57.53	1.29	17.36	6.255	0.06	1.59	4.3	4.5	4.19	0.49	1.53	99.79
17PJ10–6	Zhou et al., 2021	Yes	129	125.36	41.27	-11.01	58.25	0.79	17.52	5.481	0.09	2.21	5.54	3.34	3.01	0.38	2.61	99.82
17PJ10–4	Zhou et al., 2021	Yes	129	125.36	41.27		53.45	1.65	18.59	7.002	0.06	2.88	4.58	4.54	3.61	0.8	2.08	100.03
17PJ10–2	Zhou et al., 2021	Yes	129	125.36	41.27		50.91	1.71	16.44	9.54	0.12	5.35	7.19	3.69	2.46	0.32	0.72	99.5
16PJ32–9	Zhou et al., 2021	Yes	130	121.53	38.95		57.36	0.77	15.31	5.607	0.1	4.57	6.7	3.29	1.93	0.22	3.19	99.68
16PJ32–8	Zhou et al., 2021	Yes	130	121.53	38.95	-9.04	58.01	0.74	15.47	5.265	0.07	3.9	6.83	3.34	2.3	0.23	2.72	99.45
16PJ32–5	Zhou et al., 2021	Yes	130	121.53	38.95		61.24	0.76	16.56	4.356	0.06	2.51	4.75	3.79	2.77	0.29	2.5	100.06
16PJ32–3	Zhou et al., 2021	Yes	130	121.53	38.95		57.32	0.84	15.98	5.868	0.1	3.8	6.74	3.42	1.94	0.2	2.82	99.69
16PJ32–15	Zhou et al., 2021	Yes	130	121.53	38.95		60.4	0.76	16.54	4.446	0.06	2.22	4.94	3.8	2.99	0.29	2.8	99.74
16PJ31–2	Zhou et al., 2021	Yes	130	121.53	38.95	-9.47	60.24	0.76	16.24	4.401	0.08	2.33	5.51	3.77	1.97	0.3	3.89	99.96
16PJ30–1	Zhou et al., 2021	Yes	130	121.53	38.95	-12.57	56.15	0.7	16.88	6.165	0.09	2.69	7.54	4.16	0.45	0.18	4.19	99.9
16PJ28–9	Zhou et al., 2021	Yes	130	121.53	38.95		59.45	0.59	16.59	4.914	0.09	3.92	5.55	3.79	0.98	0.15	3.22	99.79
16PJ28–4	Zhou et al., 2021	Yes	130	121.53	38.95	-12.09	59.02	0.58	16.28	5.076	0.1	3.93	6.01	3.47	1.53	0.15	2.95	99.67
16PJ2–8	Zhou et al., 2021	Yes	130	126.7	42.05	-1.36	53.36	1.82	16.99	7.047	0.09	1.81	6.27	4.1	2.97	0.58	4.4	100.23
16PJ26–10	Zhou et al., 2021	Yes	129	124.4	40.35	-11.36	55.2	1.03	18.38	6.21	0.13	3.16	7.26	3.48	2.15	0.23	2.04	99.94
16PJ25–8	Zhou et al., 2021	Yes	129	124.4	40.35	-12.5	56.92	0.95	18.27	5.841	0.08	2.83	6.38	3.49	2.32	0.21	1.64	99.58
16PJ24–18	Zhou et al., 2021	Yes	129	124.4	40.35	-2.94	57.64	0.78	14.41	5.985	0.1	5.92	5.95	2.82	2	0.16	3.3	99.74
16PJ24–14	Zhou et al., 2021	Yes	129	124.4	40.35		56.19	0.75	13.8	5.904	0.12	6.7	8.1	2.95	1.82	0.16	2.59	99.73
16PJ24–12	Zhou et al., 2021	Yes	129	124.4	40.35		56.99	0.76	13.96	5.571	0.11	6.41	7.71	2.93	1.82	0.15	2.64	99.67
16PJ24–10	Zhou et al., 2021	Yes	129	124.4	40.35	-3.28	56.55	0.75	13.85	5.688	0.13	6.26	7.96	2.92	1.82	0.15	2.88	99.59
16PJ22–2	Zhou et al., 2021	Yes	130	124.39	40.14	-20.25	60.62	0.62	16.03	4.302	0.05	2.8	5.32	3.53	2.46	0.18	3.69	100.06
16PJ22–1	Zhou et al., 2021	Yes	130	124.39	40.14		60.08	0.64	15.98	4.545	0.05	2.94	5.25	3.66	2.33	0.18	3.67	99.84
16PJ2–2	Zhou et al., 2021	Yes	130	126.7	42.05		53.54	1.44	18.69	6.408	0.06	1.8	6.42	4.05	2.57	0.5	3.85	100.03
16PJ20–8	Zhou et al., 2021	Yes	129	125.36	41.27		49.27	1.47	13.8	9.522	0.16	9.76	8.46	2.48	1.46	0.29	1.66	99.38
16PJ20–5	Zhou et al., 2021	Yes	129	125.36	41.27	-1.14	49.66	1.5	14.34	9.324	0.16	8.27	8.66	2.88	1.97	0.3	0.95	99.05
16PJ19–2	Zhou et al., 2021	Yes	129	125.36	41.27	-11.16	55.47	0.91	17.3	6.669	0.08	3.46	6.14	3.02	2.92	0.29	3.03	100.02
16PJ1–7	Zhou et al., 2021	Yes	130	126.7	42.05	-3.76	61.91	0.64	15.1	3.915	0.09	2.12	5.29	3.67	3.59	0.24	2.77	99.77
16PJ15–2	Zhou et al., 2021	Yes	129	125.36	41.27		53.16	1.93	15.65	8.505	0.13	2.47	6.02	2.89	4.1	0.87	3.62	100.29
16PJ14–4	Zhou et al., 2021	Yes	129	125.36	41.27	-8.93	53.6	1.27	18.47	6.93	0.1	2.53	6.75	3.44	2.8	0.39	2.9	99.95
16PJ14–1	Zhou et al., 2021	Yes	129	125.36	41.27		53.7	1.14	19.42	6.309	0.08	2.37	7.47	3.46	2.7	0.37	2.31	100.03
16PJ10–5	Zhou et al., 2021	Yes	132	126.7	42.05	-8.4	54.12	1.65	18.75	6.66	0.06	2.32	4.93	4.66	3.51	0.72	1.94	100.05
16PJ10–4	Zhou et al., 2021	Yes	132	126.7	42.05	-1.3	49.87	1.54	14.68	9.405	0.15	8.12	8.53	2.99	1.84	0.28	0.9	99.34
NS-7	Zou et al., 2000	No	0.635	116	32.78		44.7	2.27	14.54	12.564	0.19	9.73	8.64	3.25	0.6	1.43	1.416	99.33
NS-30	Zou et al., 2000	No	0.635	116	32.78		44.8	2.24	14.48	12.384	0.21	9.37	8.56	4.21	0.83	1.41	1.326	99.82
NS-29	Zou et al., 2000	No	0.635	116	32.78		44.4	2.31	14.71	12.744	0.22	9.63	8.88	3.59	0.79	1.47	1.446	100.19
NS-26	Zou et al., 2000	No	0.635	116	32.78		44.3	2.3	14.8	12.681	0.22	10.04	8.7	3.27	0.69	1.47	1.409	99.88
NS-19	Zou et al., 2000	No	0.635	116	32.78		43.9	2.22	14.42	12.087	0.17	8.95	7.94	4.43	2.88	1.38	1.353	99.73
NS-1	Zou et al., 2000	No	0.635	116	32.78		45.2	2.23	14.66	11.862	0.2	8.73	8.05	5.96	0.73	1.26	1.318	100.2

## Sheet: Filtered mafic magma data
Sample ID	Reference	On-craton	Age (Ma))	Longitude (°E)	Latitude (°N)	εNd(t)	Eu/Eu*	(La/Yb)N	SiO2	TiO2	Al2O3	FeOT	MnO	MgO	CaO	Na2O	K2O	P2O5	LOI	Total	Calculated Pressurea (Gpa)	Calculated Pressureb (Gpa)	Calculated Pressurec (Gpa)	Calculated Pressured (Gpa)
SH-17-05	Choi et al., 2020	Yes	12.05	128.1	42.4		0.930663	8.49156	50.66	1.369	14.71	8.19	0.151	9.07	9.33	3.19	2.13	0.4	0.6	100.71	2.86085	2.67053	2.38796
BDAC03	Choi et al., 2020	Yes	12.05	128.1	42.4		1.02133	10.4163	49.2115	1.26437	14.8707	8.01753	0.139909	9.31283	8.70198	3.415	2.41987	0.433826	1.20372	99.8821	2.77437	2.59268	2.32403	2.13364
BDAC04	Choi et al., 2020	Yes	12.05	128.1	42.4		1.08846	13.1869	47.9456	3.1229	15.2861	10.5421	0.141008	7.4368	8.8683	3.08617	1.90806	0.5214	-0.0767553	99.9531	3.35306	3.0921	2.7014	2.41358
B10-2	Choi et al., 2020	Yes	12.05	128.1	42.4		0.97678	4.07595	52.7498	1.4724	14.6116	10.6292	0.1515	7.5993	7.5863	2.8983	0.6369	0.1938	-0.019	99.6911	3.71021	3.41142
YS-15	Chung, 1999	Yes	14	118.04	36.69		1.02196	14.9711	45.6	3.03	13.3	10.985	0.16	8.78	9.91	2.3	2.18	0.45	2.15	99.26	3.55352	3.29015	2.86239	2.57943
LJ-51	Chung, 1999	Yes	14	118.04	36.69		1.05701	9.8415	46.6	2.82	13.5	9.365	0.13	9.13	10.9	1.93	1.18	0.38	2.57	98.8	3.00065	2.77156	2.40679	2.18632
BL-09	Chung, 1999	Yes	14	120.55	37.18		1.02024	24.1241	47.7	2.99	12.2	13.055	0.15	8.01	7.15	3.12	1.23	0.44	2.94	99.93	4.79367	4.40143	3.77782	3.35247
BL-06	Chung, 1999	Yes	14	120.55	37.18		1.03261	27.3644	43.7	2.78	11.7	13.061	0.19	8.37	10	3.56	0.72	0.93	3.86	99.62	4.46691	4.07345	3.44858	2.97385
SD1721	Dai et al., 2016	Yes	6	120.85	37.34	3.79559	1.03095	9.45354	39.44	2.56	12	12.6	0.21	9.65	11.4	4.75	2.51	1.18	3.7	97.7	3.89749	3.52473	2.94282	2.51714
SD1619U	Dai et al., 2016	Yes	6	120.85	37.34	1.64978	1.0238	36.613	41.99	2.56	11.9	12.762	0.19	8.95	10.14	5.51	1.6	1.32	3.078	98.34	4.28591	3.89749	3.286	2.82921
SD1619	Dai et al., 2016	Yes	6	120.85	37.34		1.02418	36.0261	41.46	2.63	11.66	13.122	0.2	8.82	10.61	5.21	2.02	1.43	2.838	98.62	4.45348	4.0103	3.3953	2.89552
SD1615	Dai et al., 2016	Yes	5	120.76	37.81	2.95678	1.04514	20.5402	43.92	2.5	13.97	12.321	0.17	9.48	9.42	3.73	0.77	0.78	2.939	98.43	3.52907	3.2149	2.67999	2.27856
SD1614	Dai et al., 2016	Yes	5	120.76	37.81	3.05431	1.04517	20.5402	44.16	2.4	13.91	11.925	0.16	8.85	9.03	4.34	1.22	0.79	3.215	98.11	3.66195	3.30142	2.76625	2.41196
SD1613-2	Dai et al., 2016	Yes	5	120.76	37.81	3.2884	1.04326	20.3797	44.36	2.42	14.04	12.105	0.17	8.96	9.15	4.12	1.21	0.79	2.675	98.67	3.65025	3.29046	2.75686	2.40064
SD1612	Dai et al., 2016	Yes	5	120.76	37.81	3.62003	1.04673	20.9546	43.95	2.4	13.81	11.997	0.17	9.61	9.01	4.1	0.83	0.8	3.323	98.01	3.54573	3.18612	2.64947	2.29132
08QJFS07	Dai et al., 2016	Yes	6	120.85	37.34		0.966705	40.2338	39.5	2.56	11.32	13.302	0.21	10.07	11.21	4	2.2	0.89	2.83	99.57	4.20872	3.77866	3.18312	2.74497
08QJFS06	Dai et al., 2016	Yes	6	120.85	37.34		0.976059	38.7452	39.51	2.48	11.21	13.05	0.2	10.86	11.11	3.7	1.97	0.89	3.15	99.58	3.99619	3.62017	3.03089	2.59586
08QJFS05	Dai et al., 2016	Yes	6	120.85	37.34		0.97294	39.9459	39.49	2.53	11.27	13.266	0.2	10.28	11.35	4.24	2.33	0.87	2.23	99.53	4.18425	3.80145	3.16	2.72406
08QJFS04	Dai et al., 2016	Yes	6	120.85	37.34		0.97229	38.8702	39.45	2.57	11.19	13.311	0.2	10.25	11.46	4.16	2.33	0.87	2.36	99.63	4.24778	3.81516	3.21699	2.77593
08QJFS03	Dai et al., 2016	Yes	6	120.85	37.34		0.978147	39.6955	39.56	2.52	11.33	13.284	0.2	9.99	11.38	4.14	2.41	0.89	2.33	99.51	4.21507	3.83198	3.18971	2.75373
08QJFS02	Dai et al., 2016	Yes	6	120.85	37.34		0.986587	40.9262	39.74	2.51	11.3	13.185	0.2	9.2	12.57	3.39	1.99	0.85	3.1	99.5	4.20335	3.81685	3.16601	2.76124
08QJFS01	Dai et al., 2016	Yes	6	120.85	37.34		0.9711	40.511	40.21	2.57	11.41	13.554	0.21	8.99	11.65	5.23	2.79	0.79	1.08	99.99	4.62918	4.17994	3.51633	3.02323
08LHS06	Dai et al., 2016	Yes	5	120.76	37.81		0.948168	38.4515	39.52	2.8	11.41	13.779	0.19	9.16	11.49	3.43	1.59	1.25	3.85	100	4.34404	3.90444	3.2485	2.79563
08LHS05	Dai et al., 2016	Yes	5	120.76	37.81		0.947032	43.4594	39.36	2.94	11.35	14.454	0.2	8.81	11.31	4.86	2.66	1.13	0.83	99.51	4.8157	4.35425	3.6299	3.1296
08LHS04	Dai et al., 2016	Yes	5	120.76	37.81		0.962126	44.7449	39.15	2.98	11.3	14.391	0.2	9.02	11.38	4.68	2.6	1.17	1.34	99.81	4.71587	4.259	3.54053	3.04458
08LHS03	Dai et al., 2016	Yes	5	120.76	37.81		0.956747	42.6441	39.42	2.97	11.37	14.382	0.2	8.87	11.06	5.67	2.89	1.3	0.24	99.97	4.86381	4.39801	3.66851	3.12205
08LHS02	Dai et al., 2016	Yes	5	120.76	37.81		0.954013	43.318	39.49	2.98	11.34	14.4	0.2	8.87	11.08	5.51	2.71	1.39	0.45	100.02	4.86232	4.39617	3.66508	3.11602
08LHS01	Dai et al., 2016	Yes	5	120.76	37.81		0.945969	42.559	39.38	2.96	11.37	14.373	0.2	8.82	11.02	5.45	2.7	1.29	0.63	99.79	4.84985	4.38539	3.65653	3.10938
08GDS05	Dai et al., 2016	Yes	5	120.76	37.81		0.96476	28.4995	42.68	2.11	12.3	11.808	0.18	10.36	9.98	5.31	1.56	1.21	1	99.81	3.75102	3.37925	2.83169	2.46616
08GDS04	Dai et al., 2016	Yes	5	120.76	37.81		0.954867	28.4493	41.74	2.09	12.23	11.475	0.18	11.3	9.83	4.57	1.52	1.18	2.5	99.89	3.45471	3.0924	2.60221	2.25179
08GDS03	Dai et al., 2016	Yes	5	120.76	37.81		0.969808	27.9866	43.35	2.12	12.45	11.979	0.18	9.43	9.91	4.77	1.25	1.23	1.88	99.88	3.84937	3.52039	2.96373	2.54979
08GDS02	Dai et al., 2016	Yes	5	120.76	37.81		0.971958	34.0533	43.07	2.77	12.58	12.969	0.17	7.87	9.38	4.97	2.2	1.35	1.19	99.96	4.46066	4.02731	3.42522	2.97905
08GDS01	Dai et al., 2016	Yes	5	120.76	37.81		0.975207	33.6223	43	2.78	12.57	13.023	0.17	7.81	9.44	4.76	2.17	1.38	1.54	100.09	4.45192	4.01881	3.41669	2.97048
FX2-1	Gao et al., 2008	Yes	119	118.04	35.04		0.96	41.0021	49.41	1.08	11.72	8.89056	0.15	12.9	8.97	2.59	2.08	0.67	0.75	100.198	2.38546	2.38546	2.38546	2.38546
FX2-90	Gao et al., 2008	Yes	119	118.04	35.04		0.98	50.913	48.29	1.09	11.5	8.082	0.11	14.26	8.82	2.44	1.97	0.66	1.38	99.5	3.87226	3.87226	3.87226	3.87226
FX2-89	Gao et al., 2008	Yes	119	118.04	35.04		0.98	51.236	48.41	1.09	11.49	7.965	0.11	13.91	8.88	1.75	2.94	0.66	1.45	99.54	3.96144	3.96144	3.96144	3.96144
FX2-88	Gao et al., 2008	Yes	119	118.04	35.04	-13.1	0.98	50.3175	48.29	1.08	11.45	8.091	0.12	14.57	8.75	2.45	2.01	0.66	1.26	99.63	3.86109	3.86109	3.86109	3.86109
SHT-45	Gao et al., 2008	Yes	125	120.78	41.6		0.97	26.0835	50.164	0.837	12.538	7.416	0.126	9.989	8.02	2.617	3.469	0.86	3.26613	100.126	1.71577	1.71577	1.71577	1.71577
SHT-24	Gao et al., 2008	Yes	125	120.78	41.6		0.94	24.8613	50.234	0.821	11.979	7.4754	0.126	11.86	7.181	2.682	3.12	0.726	2.64969	99.6847	1.67748	1.67748	1.67748	1.67748
SHT-51	Gao et al., 2008	Yes	125	120.78	41.6		0.95	25.0069	49.9	0.86	13.19	7.542	0.12	10	8.04	2.62	2.56	0.82	3.1	99.59	3.88831	3.88831	3.88831	3.88831
SHT-50	Gao et al., 2008	Yes	125	120.78	41.6		0.94	24.8871	49.94	0.85	13	7.731	0.11	10.24	8.03	2.64	2.42	0.8	3.35	99.97	3.93166	3.93166	3.93166	3.93166
SHT-49	Gao et al., 2008	Yes	125	120.78	41.6		0.95	24.8108	49.895	0.855	13.09	7.5645	0.11	10.275	8.08	2.59	2.485	0.805	2.91	99.5	3.87281	3.87281	3.87281	3.87281
SHT-44	Gao et al., 2008	Yes	125	120.78	41.6		0.94	26.9475	50.169	0.817	12.106	7.4565	0.12	10.245	8.273	2.608	3.366	0.828	3.37972	100.197	4.19017	4.19017	4.19017	4.19017
SHT-43	Gao et al., 2008	Yes	125	120.78	41.6		0.95	23.9027	49.86	0.85	12.6	7.74	0.12	10.76	8.33	2.56	2.38	0.76	3	99.82	3.94909	3.94909	3.94909	3.94909
SHT-42	Gao et al., 2008	Yes	125	120.78	41.6		0.95	24.0793	49.89	0.85	13.12	7.5555	0.125	9.98	8.445	2.655	2.485	0.81	2.8	99.555	3.87504	3.87504	3.87504	3.87504
SHT-41	Gao et al., 2008	Yes	125	120.78	41.6		0.94	24.5916	49.77	0.85	13.1	7.506	0.12	10.22	8.19	2.57	2.48	0.81	3.35	99.8	3.80767	3.80767	3.80767	3.80767
SHT-37	Gao et al., 2008	Yes	125	120.78	41.6		0.96	24.8995	50.08	0.86	13.11	7.623	0.11	10.45	8.04	2.64	2.49	0.81	2.5	99.56	3.88775	3.88775	3.88775	3.88775
SHT-36	Gao et al., 2008	Yes	125	120.78	41.6	-2.23	0.95	23.5671	49.77	0.88	12.55	7.803	0.12	10.77	8.47	2.48	2.39	0.76	3	99.86	3.99977	3.99977	3.99977	3.99977
SHT-35	Gao et al., 2008	Yes	125	120.78	41.6		0.96	25.013	49.89	0.86	13.16	7.605	0.11	10.47	8.01	2.6	2.49	0.8	2.71	99.55	3.82105	3.82105	3.82105	3.82105
SHT-34	Gao et al., 2008	Yes	125	120.78	41.6		0.95	24.6547	50.11	0.85	13.33	7.506	0.11	9.73	8.25	2.69	2.5	0.82	2.77	99.5	3.8345	3.8345	3.8345	3.8345
SHT-33	Gao et al., 2008	Yes	125	120.78	41.6		0.95	24.422	51.53	0.81	13.39	7.173	0.11	9.72	7.53	2.72	2.56	0.74	2.51	99.59	3.82357	3.82357	3.82357	3.82357
SHT-32	Gao et al., 2008	Yes	125	120.78	41.6		0.95	25.7207	50.12	0.87	13.34	7.524	0.11	9.63	8.38	2.61	2.54	0.83	2.75	99.54	3.82665	3.82665	3.82665	3.82665
SHT-31	Gao et al., 2008	Yes	125	120.78	41.6	-2.16	0.95	22.1555	50.52	0.87	12.85	7.524	0.12	11.51	7.32	3.01	2.35	0.67	2.14	99.72	3.87198	3.87198	3.87198	3.87198
SHT-30	Gao et al., 2008	Yes	125	120.78	41.6		1.02	24.8257	50.19	0.85	13.21	7.614	0.12	10.22	7.96	2.65	2.55	0.81	2.49	99.51	3.86696	3.86696	3.86696	3.86696
SHT-28	Gao et al., 2008	Yes	125	120.78	41.6	-1.58	0.97	24.628	50.19	0.83	12.78	7.677	0.11	10.86	8.14	2.58	2.39	0.77	2.33	99.51	3.8936	3.8936	3.8936	3.8936
SHT-27	Gao et al., 2008	Yes	125	120.78	41.6		0.96	25.1219	50.18	0.85	13.25	7.605	0.11	10.05	8.19	2.65	2.47	0.81	2.51	99.52	3.8756	3.8756	3.8756	3.8756
SHT-25	Gao et al., 2008	Yes	125	120.78	41.6		0.96	24.8573	49.505	0.845	12.73	7.6725	0.11	10.205	8.19	2.565	2.395	0.78	3.85	99.7	3.96585	3.96585	3.96585	3.96585
SHT-21	Gao et al., 2008	Yes	125	120.78	41.6	-1.73	0.97	27.9384	49.41	0.84	12.67	7.632	0.12	11.05	8.08	2.48	2.35	0.77	3.25	99.5	3.88581	3.88581	3.88581	3.88581
SHT-20	Gao et al., 2008	Yes	125	120.78	41.6		0.96	24.8136	49.91	0.86	13.12	7.551	0.12	10.2	8.25	2.63	2.43	0.8	2.97	99.68	3.84681	3.84681	3.84681	3.84681
SHT-19	Gao et al., 2008	Yes	125	120.78	41.6	-2.44	0.95	25.1514	49.81	0.84	12.99	7.677	0.11	11.03	7.83	2.52	2.44	0.8	2.68	99.58	3.84625	3.84625	3.84625	3.84625
SHT-17	Gao et al., 2008	Yes	125	120.78	41.6		0.96	25.4091	49.83	0.86	13.21	7.596	0.11	10.4	7.85	2.56	2.44	0.81	3.03	99.54	3.80454	3.80454	3.80454	3.80454
SHT-16	Gao et al., 2008	Yes	125	120.78	41.6	-2.1	0.95	22.6169	49.9	0.86	12.6	7.56	0.12	12.29	7.3	2.69	2.3	0.67	2.39	99.52	3.80426	3.80426	3.80426	3.80426
SHT-15	Gao et al., 2008	Yes	125	120.78	41.6		0.98	25.6244	50.025	0.85	13.075	7.6365	0.12	10.405	7.91	2.65	2.565	0.805	2.67	99.56	3.90389	3.90389	3.90389	3.90389
09SD-183	Guo et al., 2013	Yes	124.9	117.98	35.27	-14.1	0.830351	43.889	47.87	1.13	12.89	7.974	0.13	11.2	9.25	2.83	1.03	0.79	3.7	99.68	3.65596	3.65596	3.65596	3.65596
09SD-178	Guo et al., 2013	Yes	124.9	117.98	35.27	-13.2	0.840609	45.4004	49.28	1.15	14.47	7.83	0.12	7.9	8.51	3.36	1.65	0.96	3.55	99.64	3.83198	3.83198	3.83198	3.83198
09SD-177	Guo et al., 2013	Yes	124.9	117.98	35.27	-14.1	0.870215	43.865	47.49	1.13	12.51	8.037	0.13	11.92	9.41	2.61	0.96	0.77	3.81	99.67	3.65995	3.65995	3.65995	3.65995
09SD-172	Guo et al., 2013	Yes	124.9	117.98	35.27	-13.8	0.830412	42.1102	48.02	1.12	12.25	7.668	0.12	11.19	10.43	2.56	0.9	0.74	3.81	99.67	3.63563	3.63563	3.63563	3.63563
09SD-171	Guo et al., 2013	Yes	124.9	117.98	35.27	-13.8	0.845559	43.3786	48.3	1.13	12.17	7.911	0.13	11.91	10.13	2.72	0.85	0.74	2.71	99.58	3.70993	3.70993	3.70993	3.70993
09SD-170	Guo et al., 2013	Yes	124.9	117.98	35.27	-11.1	0.850791	43.5073	47.59	1.14	12.65	8.028	0.13	11.71	9.27	2.81	1.01	0.78	3.66	99.66	3.67193	3.67193	3.67193	3.67193
09SD-169	Guo et al., 2013	Yes	124.9	117.98	35.27	-12.2	0.857149	45.0641	49.38	1.13	14.34	7.902	0.13	8.8	8.54	2.92	1.68	0.95	2.97	99.62	3.74735	3.74735	3.74735	3.74735
09SD-167	Guo et al., 2013	Yes	124.9	117.98	35.27	-13	0.850889	44.9452	49.57	1.12	14.46	7.947	0.13	8.94	8.37	2.37	2.79	0.93	2.06	99.58	3.78092	3.78092	3.78092	3.78092
09SD-165	Guo et al., 2013	Yes	124.9	117.98	35.27	-13	0.84063	46.1941	49.57	1.13	14.5	7.893	0.13	8.73	8.36	2.4	2.86	0.96	2.16	99.57	3.76652	3.76652	3.76652	3.76652
DMB-06	Guo et al., 2016	Yes	18.255	118.26	42.41	2.18478	0.958804	10.4406	47.3999	2.17651	14.3964	12.0246	0.173	7.52196	8.82445	3.70408	1.22347	0.4332	0.178	98.0555	3.91055	3.58784	3.03667	2.66611
DMB-09	Guo et al., 2016	Yes	18.255	118.26	42.41	3.34154	0.987881	13.1619	48.0082	2.32438	12.4069	11.466	0.164137	8.79174	8.20741	2.92676	1.48995	0.552374	1.825	98.1629	4.13435	3.79921	3.27472	2.94221
DMB-12	Guo et al., 2016	Yes	18.255	118.26	42.41	3.51125	0.998032	10.2429	49.7262	2.04727	11.3992	11.1393	0.152517	9.60979	7.6806	2.54593	0.950192	0.388225	2.058	97.6972	4.30771	3.95048	3.43398	3.06574
DMB-15	Guo et al., 2016	Yes	18.255	118.26	42.41	2.32133	0.997668	14.0078	48.2602	2.23413	12.6449	11.0762	0.158653	8.60546	8.36082	2.75194	1.65279	0.523607	1.688	97.9568	4.01909	3.68635	3.2119	2.87853
DMB-35	Guo et al., 2016	Yes	18.255	118.26	42.41	4.75033	1.02252	21.4868	45.4915	3.11888	11.6776	12.5426	0.174039	9.23895	9.15095	2.68563	1.69702	0.887705	1.403	98.068	4.3165	3.98322	3.42609	3.02049
SM-03	Guo et al., 2016	Yes	18.255	118.7	42.34	4.16255	1.01214	8.794	36.6634	2.91925	16.889	14.461	0.201629	9.15798	10.394	4.4392	1.74146	0.533012	0.476	97.8759	3.17922	2.79064	2.16583	1.72574
SM-06	Guo et al., 2016	Yes	18.255	118.7	42.34	4.07695	1.01878	8.56332	46.6381	2.42245	13.6463	12.409	0.174344	8.68519	8.32838	3.57805	1.41067	0.418273	0.338	98.0487	4.02621	3.65881	3.1588	2.75248
SM-09	Guo et al., 2016	Yes	18.255	118.7	42.34	2.18868	0.994341	10.3121	48.3789	2.10991	13.7212	11.2772	0.168143	8.15764	8.09218	3.75299	1.6083	0.449349	0.444	98.1598	3.8922	3.5665	3.10117	2.72941
YJQD-10	Guo et al., 2016	Yes	18.255	118.68	42.34	1.38499	0.98542	8.02094	51.8842	1.89924	13.7624	10.1574	0.145512	7.45558	7.90831	3.1873	1.17386	0.363869	0.307	98.2447	3.82189	3.52415	3.06817
XLM-07	Guo et al., 2016	Yes	18.255	118.14	42.24	4.74019	1.02619	11.8621	49.1258	2.09372	11.9883	11.2287	0.157421	8.89497	8.23033	2.34713	1.24189	0.426749	2.452	98.187	4.20657	3.85998	3.3616	3.00799
XLM-17	Guo et al., 2016	Yes	18.255	118.14	42.24	3.58928	0.999756	10.5075	47.8488	2.1552	12.9697	10.8623	0.179208	7.94886	9.61062	3.29384	1.27505	0.421238	1.652	98.2167	3.86863	3.53341	3.05188	2.71276
DMN-07	Guo et al., 2016	Yes	18.255	118.5	42.4	4.39686	0.991767	8.77668	49.4206	2.22928	11.8646	11.9031	0.16735	9.35627	7.89952	3.18544	1.31646	0.405406	0.365	98.113	4.45348	4.0569	3.56218	3.16121
DMN-08	Guo et al., 2016	Yes	18.255	118.5	42.4	3.33569	1.01118	8.95474	49.4965	1.97276	12.2204	11.5257	0.162418	9.55002	7.63471	3.10985	1.20058	0.360412	0.925	98.1584	4.20013	3.85635	3.36219	2.9622
CYS-3	Huang et al., 2012	Yes	128.7	117.63	36.75	-10.2	0.957695	8.67709	50.58	0.7	11.39	9.189	0.15	9.55915	8.49	2.45	1.71	0.28	1.33	99.64	3.21188	3.21188	3.21188	3.21188
JN-1	Huang et al., 2012	Yes	127.5	116.96	36.7	-7.3	1.07618	5.81632	49.89	0.57	13.26	9.522	0.17	8.53662	10.85	2.3	0.89	0.13	-0.03	99.64	4.28218	4.28218	4.28218	4.28218
JN-8	Huang et al., 2012	Yes	127.5	116.96	36.7	-8.4	1.09919	4.47555	49.6	0.53	13.27	9.72	0.16	8.77676	11.14	2.24	0.64	0.09	-0.17	99.63	4.25072	4.25072	4.25072	4.25072
LHT-9	Kuang et al., 2012b	Yes	70.1	124.04	41.85	1.85	1.03256	8.20533	47.09	2.32	12.8	11.376	0.15	8.52	7.56	4.36	1.26	0.38	2.35	99.42	4.10474	3.7736	3.25535	2.87636
LHT-7	Kuang et al., 2012b	Yes	70.1	124.04	41.85	2.97	1.03764	7.9192	47.53	2.38	13.23	11.574	0.16	8.49	7.48	4.08	1.15	0.38	1.9	99.63	4.07045	3.69516	3.18072	2.80498
LHT-6	Kuang et al., 2012b	Yes	70.1	124.04	41.85	2.33	1.00984	7.68906	49.09	2.37	13.06	11.628	0.16	8.67	7.73	3.95	1.15	0.38	1.73	100.2	4.13705	3.80229	3.2762	2.8912
LHT-3	Kuang et al., 2012b	Yes	70.1	124.04	41.85		1.01516	8.1519	47.71	2.37	12.94	11.673	0.16	8.74	7.71	3.98	1.08	0.39	1.56	99.61	4.10777	3.77613	3.20891	2.82859
LHT-23	Kuang et al., 2012b	Yes	60.1	124.04	41.85		1.07785	3.56348	49.21	1.59	14.41	11.736	0.16	8.12	9	2.78	0.32	0.17	0.82	99.63	3.72839	3.39559	2.90775	2.50529
LHT-20	Kuang et al., 2012b	Yes	60.1	124.04	41.85	3.22	1.0915	3.56425	49.04	1.48	14.36	11.691	0.16	8.81	8.97	2.9	0.29	0.15	0.98	100.13	3.62905	3.29668	2.81058	2.40485
LHT-18	Kuang et al., 2012b	Yes	60.1	124.04	41.85	3.3	1.06968	3.36991	49.57	1.57	14.55	11.655	0.16	8.03	9.1	2.93	0.3	0.17	1.04	100.37	3.70993	3.37661	2.88748	2.48352
LHT-16	Kuang et al., 2012b	Yes	60.1	124.04	41.85	3.39	1.08273	3.45798	48.61	1.5	14.37	11.7	0.16	8.51	8.88	2.69	0.27	0.15	1.49	99.63	3.6799	3.34953	2.81773	2.4139
LHT-15	Kuang et al., 2012b	Yes	60.1	124.04	41.85	3.44	1.09111	3.48691	48.92	1.51	14.25	11.862	0.16	8.78	8.84	2.91	0.29	0.16	1.16	100.14	3.73349	3.40204	2.86987	2.4668
LHT-14	Kuang et al., 2012b	Yes	60.1	124.04	41.85	3.35	1.07012	3.49771	49.4	1.55	14.35	11.736	0.16	8.37	8.76	2.88	0.56	0.16	0.9	100.13	3.75102	3.41932	2.93576	2.53537
LHT-1	Kuang et al., 2012b	Yes	70.1	124.04	41.85	2.39	1.01053	8.06698	47.59	2.41	12.76	11.754	0.16	8.85	7.29	4.27	1.12	0.4	2.09	99.99	4.20443	3.87198	3.30438	2.92529
LX165A1	Li et al., 2018	Yes	124.6	117.3	35.2	-5.6	0.931327	4.00444	47.34	0.94	12.29	7.353	0.13	9.87	9.43	3.05	2.57	0.9	3.93	97.803	2.03593	2.03593	2.03593	2.03593
LX090B1	Li et al., 2018	Yes	133	117.3	35.2	-12.4	0.720696	75.5333	50.41	0.35	8.51	7.848	0.15	14.9	13.15	1.46	0.69	0.06	1.54	99.068	1.23262	1.23262	1.23262	1.23262
LLW50-19	Liang et al., 2020	Yes	117.5	120.48	37.42	-15	0.962966	19.2408	50.27	0.8	13.93	6.479	0.13	9.2	8.53	2.38	2.15	0.29	0.9	95.2	1.14812	1.14812	1.14812	1.14812
GCH7	Liu et al., 2006	Yes	120	118.13	35.67	-6.7	1.03909	4.7814	51.59	0.68	14.72	8.187	0.19	10.49	9.04	1.29	0.46	0.1	1.4	99.59	1.18956	1.18956	1.18956	1.18956
GCH6	Liu et al., 2006	Yes	120	118.13	35.67		1.0042	3.7796	49.7	0.77	12.58	10.373	0.21	11.31	9.84	0.88	0.56	0.16	1.35	99.38	2.3598	2.3598	2.3598	2.3598
GCH2	Liu et al., 2006	Yes	120	118.13	35.67	-7.5	0.751365	3.67635	48.73	0.83	7.97	11.13	0.21	14.95	10.11	0.68	0.43	0.2	1.2	99.31	3.08362	3.08362	3.08362	3.08362
KL8	Liu et al., 2006	Yes	120	118.22	36.5		0.886236	11.5913	49.02	0.15	18.02	8.774	0.25	7.59	9.19	2.54	1.12	0.37	1.9	99.98	2.14334	2.14334	2.14334	2.14334
GCH4	Liu et al., 2006	Yes	120	118.13	35.67		0.926195	6.83854	52.75	0.95	14.42	8.711	0.18	7.67	8.83	1.91	0.49	0.25	1.64	99.48	1.35065	1.35065	1.35065	1.35065
MY9	Liu et al., 2008a	Yes	144	118.04	36.69	-4.4	1.06718	3.67573	47.95	0.92	12.44	11.25	0.23	12.42	10.83	1.4	0.49	0.16	0.63	99.97	4.71638	4.71638	4.71638	4.71638
MY8	Liu et al., 2008a	Yes	144	118.04	36.69	-5.5	0.896928	1.89496	48.25	0.59	11.69	10.836	0.23	13.95	11.4	0.78	0.53	0.02	0.59	100.07	4.52685	4.52685	4.52685	4.52685
MY4	Liu et al., 2008a	Yes	144	118.04	36.69	-6.5	1.08337	6.64116	51.78	0.76	14.43	8.982	0.19	9.66	8.98	2.88	0.62	0.21	0.64	100.11	1.81199	1.81199	1.81199	1.81199
MY2	Liu et al., 2008a	Yes	144	118.04	36.69		0.840385	3.62859	48.36	0.55	8.16	11.367	0.21	17.97	10.28	1.15	0.5	0.04	0.2	100.05	5.8001	5.8001	5.8001	5.8001
MY1	Liu et al., 2008a	Yes	144	118.04	36.69	-5	0.87744	2.63422	48.54	0.75	9.81	11.052	0.21	14.46	11.8	1.05	0.7	0.03	0.35	99.99	5.23152	5.23152	5.23152	5.23152
ZB-12	Liu et al., 2008b	Yes	22.8	115.58	37.55		1.06432	8.58667	49.5	1.91	14.4	10.26	0.14	8	8.05	2.8	1.06	0.33	2.52	100	3.46925	3.18492	2.74998
ZB-10	Liu et al., 2008b	Yes	22.8	115.58	37.55		1.06192	9.52216	48.7	1.91	14.4	10.17	0.14	8.81	7.78	2.68	1.07	0.33	3.12	100	3.30408	3.07059	2.64282
ZB-02	Liu et al., 2008b	Yes	22.8	115.58	37.55		1.03243	19.5186	45.3	2.66	14.2	12.15	0.16	8.04	8.72	2.86	1.95	0.8	1.7	99.9	3.75243	3.44157	2.96189	2.57848
WF2-7	Liu et al., 2008b	Yes	39.34	122.55	39.75		1.01105	10.1654	44.7	2.49	12.2	11.25	0.15	10.1	12.3	1.88	1.09	0.29	1.81	99.5	3.45121	3.17231	2.70774	2.38342
WF2-4	Liu et al., 2008b	Yes	39.34	122.55	39.75		1.0049	10.1433	43.6	2.49	12	11.07	0.15	9.98	11.9	1.92	1.11	0.29	3.78	99.5	3.48088	3.1573	2.697	2.37662
WF2-2	Liu et al., 2008b	Yes	39.34	122.55	39.75		1.00288	10.1899	45.1	2.45	12.3	11.25	0.14	10.1	11.8	1.86	1.1	0.28	2.38	100	3.48088	3.20203	2.73693	2.41196
WF2-1	Liu et al., 2008b	Yes	39.34	122.55	39.75		0.994501	10.2643	44.7	2.44	12.1	11.16	0.15	10.2	11.9	1.88	1.13	0.29	2.85	100	3.50561	3.17982	2.76155	2.43329
WF1-2	Liu et al., 2008b	Yes	36.33	122.55	39.75		1.00499	15.0687	44.3	2.06	12.9	10.89	0.17	8.64	12.7	1.91	1.31	0.44	3.12	99.6	3.36601	3.08817	2.62415	2.29983
QX-99	Liu et al., 2008b	Yes	7.15	120.85	37.34		1.0473	44.0849	39.7	2.51	11.2	13.14	0.21	9.75	13.2	3.19	1.64	0.91	2.71	99.6	4.01332	3.62933	3.02475	2.61935
QX-92	Liu et al., 2008b	Yes	7.15	120.85	37.34		1.00851	43.7839	39.9	2.51	11.4	13.23	0.21	10.3	11.4	4.06	2.33	0.85	2.02	99.6	4.14563	3.7654	3.12719	2.73505
QX-77	Liu et al., 2008b	Yes	7.15	120.85	37.34		1.03083	43.4768	39.8	2.5	11.4	13.23	0.21	10.3	11.6	3.9	2.26	0.92	2.03	99.6	4.12351	3.6963	3.10359	2.66832
QX-73	Liu et al., 2008b	Yes	7.15	120.85	37.34		1.03027	41.9307	39.7	2.53	11.2	13.23	0.21	10.7	11.3	3.76	2.18	0.8	2.59	99.6	4.11266	3.73377	3.14135	2.70554
QX-72	Liu et al., 2008b	Yes	7.15	120.85	37.34		1.03487	41.7234	39.9	2.52	11.1	13.41	0.21	10.8	11.5	3.91	2.26	0.76	1.79	99.6	4.20362	3.82049	3.17802	2.74069
QX-103	Liu et al., 2008b	Yes	7.15	120.85	37.34		1.02407	44.2274	39.7	2.51	11.3	13.14	0.21	10.3	11.5	3.75	2.2	0.82	2.66	99.6	4.10967	3.73037	3.13713	2.70108
DD19-3	Liu et al., 2008b	Yes	81.58	122.25	39.5		1.01316	12.8696	43.5	2.64	13.5	12.33	0.2	8.82	12.6	2.42	0.89	0.56	1.83	101	3.48001	3.16151	2.66389	2.29525
DD19-2	Liu et al., 2008b	Yes	81.58	122.25	39.5		1.01084	13.8833	43.7	2.58	14.1	12.33	0.2	7.86	12.4	2.61	0.87	0.6	1.98	101	3.53774	3.17441	2.67809	2.27201
DD19-1	Liu et al., 2008b	Yes	81.58	122.25	39.5		0.986666	14.2762	44	2.57	14	12.33	0.2	7.87	12.4	2.45	1.02	0.59	1.84	101	3.55467	3.23628	2.69448	2.33413
DD18-4	Liu et al., 2008b	Yes	58.36	122.25	39.5		0.99673	7.48478	45.3	2.28	10.6	11.88	0.18	14.3	10.4	2.12	0.71	0.42	1.29	101	3.67079	3.38424	2.90138	2.4832
DD18-1	Liu et al., 2008b	Yes	58.36	122.25	39.5		1.00233	7.61786	45.6	2.49	11.7	11.61	0.17	12.8	10.4	2.31	0.8	0.45	1.14	101	3.51517	3.18911	2.72155	2.39773
YX-30	Liu et al., 2008b	Yes	125	121.24	41.53		1.02549	10.9177	49.6	0.73	12.5	8.226	0.14	12.8	7.59	3.25	1.45	0.68	1.75	99.6	1.96707	1.96707	1.96707	1.96707
YX-108	Liu et al., 2008b	Yes	125	121.24	41.53		1.01776	9.54569	49.3	0.7	12.4	8.469	0.15	14	7.3	2.99	1.29	0.67	2.08	100	2.06972	2.06972	2.06972	2.06972
YX-103	Liu et al., 2008b	Yes	125	121.24	41.53		0.972438	9.81933	49.3	0.7	12.3	8.523	0.15	14	7.48	3.13	1.27	0.67	1.19	99.6	2.11481	2.11481	2.11481	2.11481
YX-27	Liu et al., 2008b	Yes	125	121.24	41.53		1.01475	9.07719	49.3	0.71	12.5	8.559	0.14	13.9	7.46	2.98	1.26	0.67	1.76	100	3.89999	3.89999	3.89999	3.89999
YX-26	Liu et al., 2008b	Yes	125	121.24	41.53		1.00953	9.49853	48.9	0.69	12.4	8.604	0.14	14.4	7.44	2.89	1.22	0.66	1.84	100	3.87671	3.87671	3.87671	3.87671
YX-25	Liu et al., 2008b	Yes	125	121.24	41.53		0.99889	9.45148	49.3	0.71	12.5	8.631	0.14	14.1	7.57	2.99	1.27	0.68	1.57	100	3.9011	3.9011	3.9011	3.9011
SFX-49	Liu et al., 2008b	Yes	119.1	118.04	35.04		0.969718	40.0286	48.5	1.13	11.7	8.055	0.12	13.6	8.87	2.05	2.24	0.68	2.09	99.8	3.88859	3.88859	3.88859	3.88859
SFX30	Liu et al., 2008b	Yes	119.1	118.04	35.04		0.946443	39.4187	48.9	1.08	11.7	8.028	0.12	13.6	8.84	2.43	2.08	0.65	1.47	99.8	3.88692	3.88692	3.88692	3.88692
SFX28	Liu et al., 2008b	Yes	119.1	118.04	35.04		0.945773	37.2758	49.5	1.07	11.9	7.866	0.12	13.1	8.76	2.19	2.53	0.65	1.07	99.5	3.91776	3.91776	3.91776	3.91776
SFX27	Liu et al., 2008b	Yes	119.1	118.04	35.04		0.959821	38.0161	49.2	1.07	11.9	7.875	0.12	13	8.74	2.18	2.72	0.64	0.94	99.3	3.91665	3.91665	3.91665	3.91665
SFX19	Liu et al., 2008b	Yes	119.1	118.04	35.04		0.943929	39.265	48.7	1.1	12	7.974	0.12	13.4	8.79	2.23	2.62	0.64	1.44	99.9	3.85495	3.85495	3.85495	3.85495
SFX13	Liu et al., 2008b	Yes	119.1	118.04	35.04		0.961447	38.3333	48.6	1.1	11.8	7.965	0.12	13.6	8.78	1.93	2.62	0.66	1.48	99.5	3.87894	3.87894	3.87894	3.87894
SFX02	Liu et al., 2008b	Yes	119.1	118.04	35.04		0.945322	40.2403	48.8	1.09	12.1	8.046	0.12	12.7	8.82	2.37	2.29	0.68	1.52	99.4	3.89109	3.89109	3.89109	3.89109
B6-4	Liu et al., 2009	Yes	125.4	120.52	36.89	-15	1.00221	4.63593	47.1	1.6	14.2	10.755	0.18	8.39	9.42	2.74	1.14	0.4	2.92	100.04	4.79918	4.79918	4.79918	4.79918
B6-7	Liu et al., 2009	Yes	125.4	120.52	36.89		1.01023	8.91614	48.39	1.62	14.67	10.134	0.15	8.26	9.15	3.41	1.3	0.3	1.19	99.71	4.62083	4.62083	4.62083	4.62083
B6-5	Liu et al., 2009	Yes	125.4	120.52	36.89		0.978637	9.14647	47.5	1.61	13.85	10.638	0.16	8.44	9.31	2.74	1	0.34	2.66	99.42	4.86729	4.86729	4.86729	4.86729
B6-3	Liu et al., 2009	Yes	125.4	120.52	36.89		1.01356	8.96886	47.09	1.62	13.92	10.638	0.17	8.28	9.22	2.7	1.08	0.35	3.78	100.03	4.87027	4.87027	4.87027	4.87027
B6-2	Liu et al., 2009	Yes	125.4	120.52	36.89		0.934842	6.99543	46.32	1.44	14.2	10.449	0.1	7.84	8.59	2.79	0.59	0.22	3.83	99.54	4.84188	4.84188	4.84188	4.84188
B6-1	Liu et al., 2009	Yes	125.4	120.52	36.89	-14.8	0.990658	4.92844	48.7	1.4	14.33	10.719	0.15	7.7	8.57	2.58	0.58	0.21	3.25	99.39	4.95708	4.95708	4.95708	4.95708
ZJ015	Liu et al., 2010	Yes	138	115.08	39.33		1.04023	6.98734	47.2	1.65	18.17	6.507	0.08	9.61	10.13	2.8	1.34	0.06	1.62	99.88	2.31653	2.31653	2.31653	2.31653
ZJ013	Liu et al., 2010	Yes	138	115.08	39.33		1.06803	11.0993	48.48	2.26	15.07	7.74	0.09	9.86	9.14	2.96	1.67	0.1	1.65	99.86	3.37132	3.37132	3.37132	3.37132
ZJ009	Liu et al., 2010	Yes	138	115.08	39.33		1.01395	10.1899	47.88	1.63	19.23	5.886	0.08	7.43	11.28	2.93	1.08	0.1	1.69	99.85	2.10638	2.10638	2.10638	2.10638
JL7-3	Lu et al., 2012	Yes	82.2	125	43		0.997184	13.1672	45.6	2.28	15.8	8.91	0.15	7.77	8.64	4	1.12	0.66	3.92	99.5	2.67652	2.45457	2.09509	1.82829
JL4-2	Lu et al., 2012	Yes	99.3	125	43		1.01208	12.285	45.1	2.34	15.1	9.198	0.15	8.92	8.65	2.95	1.76	0.58	3.98	99.5	2.75717	2.54341	2.206	1.96612
JJLT-04	Ma et al., 2014a	Yes	120.8	119.94	37.18	-14.56	1.03253	30.0043	47.56	0.97	14.41	9.612	0.3	9.26	8.34	1.65	3.13	0.36	3.87	99.9	4.28777	4.28777	4.28777	4.28777
JJLT-01	Ma et al., 2014a	Yes	120.8	119.94	37.18	-14.93	0.929791	23.1892	51.17	0.79	12.4	7.634	0.14	11.59	7.35	1.57	3.23	0.41	3.13	99.77	1.43558	1.43558	1.43558	1.43558
JJHT-08	Ma et al., 2014a	Yes	121.6	119.94	37.18	-0.41	1.0427	15.6272	46.03	2.35	15.4	10.458	0.2	7.53	8.16	4.04	2.75	0.72	2.16	100.21	4.67511	4.67511	4.67511	4.67511
LL-01	Ma et al., 2014b	Yes	126	120.48	37.42	-16.8	0.948443	22.1913	53.19	0.65	14.52	7.313	0.11	8.44	7.13	3.24	2.5	0.06	2.59	99.91	3.91665	3.91665	3.91665	3.91665
LM-3	Ma et al., 2016	Yes	122	120.14	37.41	-0.16	0.956756	17.0524	50.07	1.83	13.03	8.576	0.24	7.61	7.94	3.3	2.22	0.89	3.72	99.8	2.10209	2.10209	2.10209	2.10209
DP-3	Ma et al., 2016	Yes	122	120.14	37.41	-2.69	1.00993	10.7227	49.21	2.19	14.45	10.523	0.18	7.37	7.85	3.06	1.1	0.52	3.06	100.1	3.0258	3.0258	3.0258	3.0258
TH38-1	Pei et al., 2011	Yes	134	125.96	41.73	-9.1	1.06248	3.75893	49.8	0.92	16.5	9.18	0.14	8.2	10.4	2.39	0.63	0.1	0.59	99.9	3.70339	3.70339	3.70339	3.70339
TH20-1	Pei et al., 2011	Yes	134	125.96	41.73	-6.6	0.974391	3.36396	46.7	0.73	7.4	11.97	0.19	20.9	8.4	1.18	0.37	0.09	0.34	99.5	6.11715	6.11715	6.11715	6.11715
DD3-3	Pei et al., 2011	Yes	132	125.96	41.73	-10.2	1.09703	9.82963	49.2	0.74	15	7.83	0.13	10.1	7.9	2.65	1.36	0.26	3.67	99.7	3.45296	3.45296	3.45296	3.45296
DD3-1	Pei et al., 2011	Yes	132	125.96	41.73	-10.2	1.08212	9.63907	49.7	0.78	15.8	7.74	0.12	8.8	7.8	2.76	1.15	0.29	3.94	99.6	3.41523	3.41523	3.41523	3.41523
250-2	Pei et al., 2011	Yes	134	125.96	41.73	-5.4	1.00669	3.03161	46.7	1.1	11.4	11.97	0.16	14.6	9.3	1.56	0.45	0.11	0.48	98.7	5.10263	5.10263	5.10263	5.10263
TH4-3	Pei et al., 2011	Yes	137	125.96	41.73	-7.2	0.975816	5.44211	48.1	1	15.3	9.81	0.15	7.2	10	2.7	0.65	0.28	3.78	100.1	4.39354	4.39354	4.39354	4.39354
F-7	Qian et al., 2017	Yes	124	117.98	35.27		0.860948	47.5111	49.57	1.13	12.86	7.713	0.13	10.92	10.07	2.76	0.95	0.71	1.96	99.62	1.59985	1.59985	1.59985	1.59985
F-6	Qian et al., 2017	Yes	124	117.98	35.27		0.859201	45.4094	48.75	1.12	12.28	8.046	0.14	11.42	10.66	3.07	0.76	0.7	1.92	99.77	1.93978	1.93978	1.93978	1.93978
F-5	Qian et al., 2017	Yes	124	117.98	35.27	-12.4	0.863848	46.0188	49.56	1.15	14.48	7.974	0.14	8.89	8.17	3.69	1.71	0.9	1.96	99.52	1.97723	1.97723	1.97723	1.97723
F-4	Qian et al., 2017	Yes	124	117.98	35.27	-13.4	0.870988	44.1926	48.48	1.13	12.61	7.983	0.14	11.64	10.41	2.8	1.05	0.73	1.87	99.73	3.64792	3.64792	3.64792	3.64792
F-3-1	Qian et al., 2017	Yes	124	117.98	35.27	-13.3	0.864086	46.279	49.63	1.05	13.72	8.163	0.15	9.87	9.05	2.75	1.71	0.8	1.89	99.69	1.89562	1.89562	1.89562	1.89562
F-2-3	Qian et al., 2017	Yes	124	117.98	35.27		0.866405	46.4596	48.64	1.11	12.39	8.712	0.18	11.87	10.05	2.8	0.88	0.72	1.76	100.07	3.99152	3.99152	3.99152	3.99152
F-2-2	Qian et al., 2017	Yes	124	117.98	35.27		0.768869	48.0407	48.85	1.13	12.75	8.055	0.14	11.14	10.02	2.85	0.94	0.73	1.95	99.45	1.86144	1.86144	1.86144	1.86144
F-2-1	Qian et al., 2017	Yes	124	117.98	35.27	-12.5	0.865739	46.1788	48.62	1.12	12.7	8.37	0.17	11.34	10.02	2.92	0.87	0.74	1.69	99.5	2.07254	2.07254	2.07254	2.07254
F-1	Qian et al., 2017	Yes	124	117.98	35.27	-12.3	0.862354	49.7687	49.87	1.13	14.4	8.082	0.16	9.03	8.66	2.97	1.81	0.89	2.01	99.91	1.86553	1.86553	1.86553	1.86553
H-X	Qian et al., 2017	Yes	124	117.98	35.27		0.950767	45.7238	49.7	1.06	11.76	7.902	0.13	12.94	8.69	1.67	3.44	0.68	0.99	99.81	4.0917	4.0917	4.0917	4.0917
H-9	Qian et al., 2017	Yes	124	117.98	35.27		0.935532	46.7587	48.94	1.1	11.54	8.055	0.13	13.34	9.15	2.39	2.13	0.72	1.42	99.8	3.95048	3.95048	3.95048	3.95048
H-8	Qian et al., 2017	Yes	124	117.98	35.27		0.939008	45.145	49.05	1.09	11.66	8.037	0.13	13.26	8.88	2.37	2.24	0.71	1.51	99.82	3.9502	3.9502	3.9502	3.9502
H-7	Qian et al., 2017	Yes	124	117.98	35.27		0.936832	46.1593	48.95	1.11	11.6	8.064	0.13	13.27	9.04	2.25	2.32	0.72	1.45	99.81	3.96392	3.96392	3.96392	3.96392
H-6	Qian et al., 2017	Yes	124	117.98	35.27		0.9461	46.4801	49.06	1.08	11.56	8.001	0.13	13.44	8.91	1.89	2.67	0.7	1.46	99.81	4.01167	4.01167	4.01167	4.01167
H-5	Qian et al., 2017	Yes	124	117.98	35.27		0.930712	46.3176	48.61	1.09	11.35	7.992	0.13	13.42	8.97	2.97	2.43	0.7	1.25	99.81	4.05553	4.05553	4.05553	4.05553
H-4	Qian et al., 2017	Yes	124	117.98	35.27		0.943243	45.2883	49.72	1.1	12.04	8.073	0.13	12.27	9.01	2.84	1.81	0.71	1.24	99.86	4.00618	4.00618	4.00618	4.00618
H-3	Qian et al., 2017	Yes	124	117.98	35.27		0.928377	45.4354	49.55	1.07	11.82	7.947	0.13	12.95	8.87	1.97	2.89	0.68	1.07	99.82	4.02183	4.02183	4.02183	4.02183
H-2	Qian et al., 2017	Yes	124	117.98	35.27		0.963928	45.7323	49.47	1.09	11.75	7.965	0.13	13.08	8.98	2.34	2.15	0.7	1.29	99.83	3.93332	3.93332	3.93332	3.93332
H-17	Qian et al., 2017	Yes	124	117.98	35.27		0.925845	45.575	49.04	1.1	11.52	8.037	0.13	13.25	9.03	2.41	2.11	0.71	1.56	99.81	3.96364	3.96364	3.96364	3.96364
H-16	Qian et al., 2017	Yes	124	117.98	35.27		0.920512	45.2883	49.29	1.08	11.62	8.046	0.13	13.16	8.82	2.36	2.21	0.68	1.51	99.81	4.02429	4.02429	4.02429	4.02429
H-15	Qian et al., 2017	Yes	124	117.98	35.27		0.928508	46.4571	49.02	1.09	11.53	7.947	0.13	13.35	8.93	1.86	2.84	0.71	1.53	99.8	3.98597	3.98597	3.98597	3.98597
H-14	Qian et al., 2017	Yes	124	117.98	35.27		0.923056	43.8274	49.54	1.07	11.55	7.947	0.13	13.07	8.92	2.3	2.34	0.68	1.38	99.81	4.02292	4.02292	4.02292	4.02292
H-13	Qian et al., 2017	Yes	124	117.98	35.27		0.927314	46.0332	49.3	1.08	11.53	7.956	0.13	13.17	9.05	2.54	1.94	0.7	1.52	99.8	3.95241	3.95241	3.95241	3.95241
H-12	Qian et al., 2017	Yes	124	117.98	35.27		0.925313	44.4174	49.78	1.07	11.8	7.947	0.13	12.91	8.85	2.35	2.42	0.68	1.02	99.82	3.97081	3.97081	3.97081	3.97081
H-1	Qian et al., 2017	Yes	124	117.98	35.27		0.887563	45.8765	49.64	1.1	12.05	8.064	0.13	12.29	9.04	2.52	2.27	0.71	1.15	99.85	4.01194	4.01194	4.01194	4.01194
F-3-3	Qian et al., 2017	Yes	124	117.98	35.27		0.865908	47.4322	49.79	1.11	13.7	8.073	0.13	10.09	8.97	2.54	1.63	0.77	1.91	99.61	3.75582	3.75582	3.75582	3.75582
SD1508-2	Sakuyama et al., 2013	Yes	12.15	118.9	36.5		1.03213	13.4928	41.94	2.75	12.86	11.736	0.19	10.87	9.96	3.91	1.93	0.87	2.984	98.3	3.40996	3.10329	2.63207	2.26458
SD1508	Sakuyama et al., 2013	Yes	12.15	118.9	36.5		1.03585	23.399	41.89	2.74	12.79	11.709	0.18	10.83	9.85	3.95	1.92	0.87	3.271	98.02	3.42405	3.11693	2.64631	2.3106
SD1407	Sakuyama et al., 2013	Yes	12.15	118.9	36.6		1.0412	13.7502	44.29	2.75	13.77	11.916	0.17	8.43	9.62	4.08	0.66	0.66	3.654	97.66	3.67706	3.31228	2.814	2.40582
SD1406	Sakuyama et al., 2013	Yes	12.15	118.9	36.6		1.04839	26.4241	44.98	2.57	14.17	11.223	0.16	7.71	8.52	5.42	1.13	0.94	3.177	98.07	3.6853	3.36631	2.82426	2.46069
SD1405	Sakuyama et al., 2013	Yes	12.15	118.9	36.6		1.04523	19.187	42.79	3.17	13.64	12.051	0.16	8.68	9.79	4.56	0.7	0.69	3.769	97.58	3.61931	3.30319	2.76875	2.36849
SD1304	Sakuyama et al., 2013	Yes	12.15	117.75	38.05		1.03196	28.6733	39.69	2.71	9.58	13.239	0.21	13.94	9.68	4.63	2.14	1.12	3.061	98.39	4.32683	3.88803	3.28422	2.84442
SD1303	Sakuyama et al., 2013	Yes	12.15	117.75	38.05		1.03194	25.5442	40.53	2.88	10.66	13.221	0.2	12.01	10.03	4.64	2.44	1.11	2.279	99.18	4.22955	3.84736	3.25416	2.82332
SD1302	Sakuyama et al., 2013	Yes	12.15	117.75	38.05		1.03479	28.4388	39.74	2.69	9.65	13.194	0.2	13.86	9.56	4.65	2.18	1.1	3.176	98.3	4.31756	3.88033	3.27858	2.84069
SD1301	Sakuyama et al., 2013	Yes	12.15	117.75	38.05		1.03389	26.4621	40.21	2.91	10.65	13.32	0.2	11.34	10.02	4.88	2.51	1.13	2.83	98.66	4.40904	3.97164	3.37073	2.93299
WLQ11-05	Sun et al., 2021	Yes	1	120.76	37.81		1.04547	29.3497	43.4809	2.5059	12.6567	11.968	0.184417	9.85003	10.0187	4.3402	1.74358	1.17751	1.84902	99.7749	3.74565	3.37896	2.88501	2.49058
WLQ11-02	Sun et al., 2021	Yes	1	120.76	37.81		1.07611	19.0554	46.4955	2.37715	13.477	12.101	0.170376	9.06746	9.28449	2.73819	2.05466	0.831598	1.12795	99.7253	3.83338	3.51604	3.02506	2.67589
KD-QY-1p	Sun et al., 2021	Yes	0.27	124.78	40.73		1.06294		49.1768	1.93187	14.7369	10.1477	0.161832	8.20288	7.84887	3.67157	2.19485	0.596757	1.33	98.67	3.46248	3.19151	2.78721	2.47999
KD-QY-1o	Sun et al., 2021	Yes	0.27	124.78	40.73		1.04695		48.8484	1.95151	15.0256	9.88073	0.151672	8.25094	7.88693	3.83224	2.2953	0.606687	1.27	98.73	3.30763	3.04063	2.68251	2.38893
KD-QY-1d	Sun et al., 2021	Yes	0.27	124.78	40.73		1.05519		48.913	1.982	15.1886	9.97251	0.161796	8.11003	7.96846	3.77187	2.24492	0.616847	1.07	98.93	3.30497	3.03819	2.64124	2.3844
KD-QY-1b	Sun et al., 2021	Yes	0.27	124.78	40.73		1.08092		48.4034	1.97255	14.5463	10.167	0.161851	8.32519	7.93068	3.65175	2.11417	0.617055	2.11	97.89	3.44567	3.17563	2.76875	2.46519
KD-QY-1a	Sun et al., 2021	Yes	0.27	124.78	40.73		1.02461		48.621	1.97194	15.1385	9.97278	0.1618	8.29227	8.00912	3.74164	2.16408	0.616864	1.31	98.69	3.25357	3.0315	2.63365	2.36232
KD-LJ-1d	Sun et al., 2021	Yes	0.27	124.78	40.73		1.06075		50.6435	1.57787	14.9898	10.175	0.151718	8.14221	8.21301	3.4086	1.29466	0.323665	1.08	98.92	3.38043	3.09573	2.70234	2.362
KD-LJ-1a	Sun et al., 2021	Yes	0.27	124.78	40.73		1.09256		50.613	1.6379	14.7916	9.74332	0.151657	7.7244	8.18949	3.16458	1.75922	0.434751	1.79	98.21	3.40878	3.12538	2.74288	2.4549
KD-LJ-1a	Sun et al., 2021	Yes	0.27	124.78	40.73		1.08761		52.0867	1.65687	14.9138	9.86108	0.154668	7.77181	8.34702	3.65744	1.84793	0.428622	-0.726	100.726	3.45908	3.22057	2.78627	2.49641
KD-HY-3b	Sun et al., 2021	Yes	0.27	124.78	40.73	2.91	1.04265		49.1894	1.94248	15.206	10.3323	0.161874	7.53725	7.6283	3.7838	1.90202	0.566558	1.75	98.25	3.47769	3.20622	2.75279	2.47194
KD-HY-3a	Sun et al., 2021	Yes	0.27	124.78	40.73	1.35	1.03743		49.2917	1.9223	14.9939	10.3781	0.161878	8.01294	7.59813	3.68272	1.87171	0.566572	1.52	98.48	3.46663	3.1945	2.7803	2.46744
KD-HY-2a	Sun et al., 2021	Yes	0.27	124.78	40.73	1.99	1.09383		48.3253	2.04391	14.874	10.4156	0.161894	8.22623	7.61913	3.6932	2.05403	0.576747	2.01	97.99	3.45383	3.18612	2.74194	2.43716
KD-HY-1d	Sun et al., 2021	Yes	0.27	124.78	40.73	4	1.05648		48.2851	2.09451	14.8336	10.4702	0.161895	9.90593	7.35609	2.72185	2.10463	0.526158	1.54	98.46	3.25238	2.99119	2.60349	2.35171
CLFS11-02	Sun et al., 2021	Yes	18.6	118.83	36.71		1.03955	21.2789	44.3295	2.82306	13.6124	12.4364	0.174214	9.15415	9.86982	4.46423	0.796831	0.821577	1.27347	99.7558	3.71447	3.39412	2.85155	2.44617
CLFS11-01	Sun et al., 2021	Yes	18.6	118.83	36.71		1.042	19.9112	44.4313	2.83478	13.6881	12.1839	0.166228	9.35428	9.82822	4.27146	0.942947	0.783646	1.27104	99.7559	3.61052	3.29342	2.75561	2.39379
B-1	Sun et al., 2021	Yes	0.27	124.78	40.73		1.05489	16.7324	48.0916	2.25429	15.0687	11.0306	0.180343	7.6145	7.7748	4.89933	2.50477	0.581106	0	100	3.72924	3.41874	2.93822	2.59903
AXQJ11-08	Sun et al., 2021	Yes	1	120.76	37.81		1.08	18.8888	46.1884	3.21109	14.5427	12.4127	0.144307	7.86323	8.16396	4.1839	1.17565	0.601449	1.24425	99.7317	3.91748	3.55699	3.02475	2.63017
AXQJ11-06	Sun et al., 2021	Yes	1	120.76	37.81		1.0857	20.8875	46.2349	3.1386	14.7274	12.1761	0.139516	8.35387	8.07785	3.93454	0.856164	0.590181	1.51142	99.7405	3.67962	3.36779	2.83666	2.43996
AXQJ11-03	Sun et al., 2021	Yes	1	120.76	37.81		1.09379	19.5674	46.3599	3.19731	14.4581	12.3999	0.140497	7.94108	8.19598	4.04129	0.889144	0.596108	1.52191	99.7412	3.8897	3.52762	2.99088	2.59077
07CL13	Sun et al., 2021	Yes	18.6	118.83	36.71	1.34	1.0098	10.1681	45.5319	2.19858	13.0091	11.7876	0.172239	11.9757	8.25734	2.24924	1.48936	0.354609	2.64437	99.67	3.49715	3.18762	2.74779	2.40064
07CL11	Sun et al., 2021	Yes	18.6	118.83	36.71	2.62	1.01646	10.2857	46.392	2.55313	13.4749	11.8603	0.182366	9.33108	8.3382	2.64431	1.49946	0.425522	2.98878	99.69	3.78035	3.46489	2.97262	2.61871
07CL10	Sun et al., 2021	Yes	18.6	118.83	36.71	1.37	1.02059	12.0184	46.2807	2.25933	13.4648	11.7874	0.172236	11.0535	8.28758	2.47209	1.5096	0.374866	2.14788	99.81	3.52329	3.2125	2.77062	2.4594
07CL08	Sun et al., 2021	Yes	18.6	118.83	36.71	5.5	0.998217	24.6917	43.5253	2.93144	13.5718	12.9877	0.202868	9.82894	9.16962	4.81811	0.892618	0.740467	1.49108	100.16	3.8345	3.47012	2.88965	2.44971
07CL05	Sun et al., 2021	Yes	18.6	118.83	36.71	5.61	0.999191	15.1574	43.6057	2.78614	13.6774	11.7782	0.192497	11.2358	8.90553	3.23193	1.84392	0.587623	1.94524	99.79	3.27888	3.02262	2.56256	2.24061
07CL01	Sun et al., 2021	Yes	18.6	118.83	36.71	1.26	1.02967	12.2173	47.4909	2.22677	14.9396	10.9108	0.172069	8.45161	9.01842	3.28955	1.0729	0.414989	1.86239	99.85	3.30793	3.03698	2.58102	2.25835
SM1109	Sun et al., 2021	Yes	8	118.96	42.27	2.24	0.994341	10.3316	48.9925	2.13667	13.8952	11.2501	0.170275	8.26109	8.19481	3.80059	1.62869	0.455048	1.2151	98.7849	3.85272	3.52676	3.06129	2.72815
SM1106	Sun et al., 2021	Yes	8	118.96	42.27	4.12	1.01878	8.52999	47.2336	2.45338	13.8206	11.1897	0.17657	8.7961	8.43472	3.62374	1.42868	0.423614	2.41936	97.5806	3.66765	3.34894	2.8949	2.56765
DMN1108	Sun et al., 2021	Yes	8	118.96	42.27	3.39	1.01118	8.92018	50.067	1.9955	12.3613	10.0082	0.16429	9.66009	7.7227	3.14569	1.21441	0.364566	3.29632	96.7037	3.77416	3.47507	3.06877	2.75029
CF14-37	Sun et al., 2021	Yes	8	118.96	42.27	3.83	1.02923	8.07155	47.6084	2.41872	12.8192	14.16	0.181404	8.88878	8.56629	3.06371	1.30006	0.443431	0.55	99.45	4.68325	4.24645	3.63076	3.16331
CF14-31	Sun et al., 2021	Yes	8	118.96	42.27	2.94	1.03047	7.92764	46.2403	2.68862	13.8157	13.907	0.181256	8.8211	8.6902	3.28274	1.4299	0.463209	0.48	99.52	4.27021	3.89943	3.31139	2.86642
CF14-27	Sun et al., 2021	Yes	22.8	118.96	42.27	3.51	1.0853	3.13699	49.7053	1.89707	14.2531	12.6063	0.170636	7.49795	9.99727	2.65992	0.441646	0.220823	0.55	99.45	4.0778	3.69487	3.11512	2.7181
09NC36-3	Sun et al., 2021	Yes	8	118.96	42.27	4.78	1.00816	10.7286	48.6306	2.13683	12.2437	11.3632	0.14178	10.117	9.5499	3.06853	1.67098	0.597502	0.48	99.52	3.92252	3.63478	3.1564	2.8196
09NC36-2	Sun et al., 2021	Yes	8	118.96	42.27	4.63	0.989146	11.0988	49.0636	2.09665	11.9519	11.5472	0.151931	10.777	9.0956	3.00823	1.63073	0.567209	0.11	99.89	4.03529	3.69686	3.2143	2.87822
09NC36-1	Sun et al., 2021	Yes	8	118.96	42.27		1.01388	11.26	49.121	2.20791	13.0247	11.4462	0.151921	9.11523	8.84178	3.31187	1.78253	0.546914	0.45	99.55	3.97192	3.64107	3.17051	2.83697
09NC34-3	Sun et al., 2021	Yes	8	118.96	42.27		1.00196	10.9515	47.5877	2.54409	12.3657	11.9475	0.152037	9.45673	9.29456	2.65559	1.44942	0.496656	2.05	97.95	4.0517	3.72013	3.2485	2.87636
09NC34-2	Sun et al., 2021	Yes	8	118.96	42.27	3.94	1.00284	10.9831	47.808	2.49327	12.2839	11.8465	0.152029	9.64877	9.01025	2.40206	1.39867	0.486493	2.47	97.53	4.02813	3.74311	3.22326	2.84751
09NC33-4	Sun et al., 2021	Yes	8	118.96	42.27	3.15	1.02399	10.9831	47.2086	2.33054	13.0409	11.6065	0.151992	9.33229	8.84592	2.83718	1.46925	0.516772	2.66	97.34	3.82665	3.50242	3.04063	2.67337
09NC33-3	Sun et al., 2021	Yes	8	118.96	42.27		1.02388	9.17305	47.7502	2.19856	12.9887	11.3499	0.151974	8.84489	8.08502	2.7558	1.50961	0.405264	3.96	96.04	3.95462	3.62733	3.113	2.78659
09NC32-4	Sun et al., 2021	Yes	8	118.96	42.27	3.92	1.02176	17.5151	45.5762	2.98361	12.0359	13.0854	0.162373	9.63078	9.81345	2.56753	1.57299	0.801719	1.77	98.23	4.24671	3.86835	3.31405	2.94993
09NC32-3	Sun et al., 2021	Yes	8	118.96	42.27		1.01822	17.389	45.9723	2.97283	12.0638	12.9913	0.162339	9.19243	10.0447	3.04385	1.75529	0.771109	1.03	98.97	4.33822	3.95619	3.39735	2.98966
09NC32-2	Sun et al., 2021	Yes	8	118.96	42.27		1.02494	17.8	45.7079	2.92141	11.9798	12.6871	0.172444	9.40329	9.8699	2.9417	1.78531	0.791215	1.74	98.26	4.23169	3.89999	3.34477	2.93975
09NC14-5	Sun et al., 2021	Yes	8	118.96	42.27		1.0058	7.53933	50.5938	2.37063	13.0081	11.7138	0.141833	8.07434	8.8139	3.13045	1.38794	0.405237	0.36	99.64	4.22258	3.88145	3.39412	3.00249
09NC14-4	Sun et al., 2021	Yes	8	118.96	42.27		0.997048	7.70919	50.2829	2.45233	13.1534	11.9357	0.14187	7.70153	8.76556	3.19208	1.43897	0.425611	0.51	99.49	4.2782	3.93886	3.40732	3.02049
09NC13-5	Sun et al., 2021	Yes	8	118.96	42.27	2.87	1.00816	11.8008	47.4999	2.57578	12.8384	12.5009	0.152113	8.49806	9.57299	2.91043	1.66311	0.598312	1.19	98.81	4.21507	3.88367	3.32351	2.95085
09NC13-3	Sun et al., 2021	Yes	8	118.96	42.27		0.960777	7.62878	51.3625	1.9747	13.6204	11.3262	0.1519	7.86843	8.67857	2.96712	1.19495	0.415194	0.44	99.56	4.02347	3.68161	3.18762	2.83511
09NC11-6	Sun et al., 2021	Yes	8	118.96	42.27	1.67	1.00691	13.3729	47.8259	2.46274	13.0333	11.9644	0.152021	9.30369	8.96925	2.78705	1.77358	0.608085	1.12	98.88	3.96861	3.64392	3.13924	2.7778
09NC11-2	Sun et al., 2021	Yes	8	118.96	42.27		1.00583	13.2836	47.3299	2.43237	12.922	11.8734	0.152023	9.42545	9.27343	2.60467	1.39861	0.608093	1.98	98.02	3.88284	3.55669	3.04672	2.71433
09NC11-1	Sun et al., 2021	Yes	8	118.96	42.27	2.1	1.01151	13.5427	47.3936	2.46293	12.9532	11.9927	0.152032	9.3652	9.23344	2.70618	1.69263	0.60813	1.44	98.56	3.94357	3.61903	3.11391	2.75185
09NC09-5	Sun et al., 2021	Yes	8	118.96	42.27		1.02747	8.34259	48.2099	2.52403	12.3262	11.9941	0.15205	9.16353	9.04189	2.60512	1.20626	0.516969	2.26	97.74	4.17209	3.83506	3.30734	2.92376
09NC08-8	Sun et al., 2021	Yes	8	118.96	42.27		1.01154	10.9208	47.1585	2.09661	13.1469	11.2372	0.151928	9.33853	9.31827	2.74484	1.54967	0.597585	2.66	97.34	3.6591	3.38102	2.91791	2.59045
09NC08-3	Sun et al., 2021	Yes	8	118.96	42.27	2.59	1.0238	10.8948	47.8407	2.07607	13.2666	11.1263	0.151907	9.42838	8.89164	2.56217	1.50895	0.587375	2.56	97.44	3.66423	3.33917	2.92006	2.58982
09NC08-2	Sun et al., 2021	Yes	8	118.96	42.27		1.00731	10.8608	48.1904	2.08599	13.3159	11.0432	0.141766	9.19455	8.86038	2.5923	1.47842	0.577191	2.52	97.48	3.66451	3.38454	2.91575	2.58759
CF14-94	Sun et al., 2021	Yes	1	116.09	43.93	4.19	1.05688	30.1225	41.5884	3.56731	12.1329	14.5882	0.191466	9.3012	10.0167	4.60525	2.60998	1.13872	0.26	99.74	4.65318	4.21078	3.51401	3.03393
CF14-93	Sun et al., 2021	Yes	1	116.09	43.93	4.42	1.06206	29.7114	41.2017	3.57926	12.5676	13.7891	0.180974	8.54598	9.31009	4.56456	2.67439	1.17633	2.41	97.59	4.46222	4.03333	3.40028	2.93176
CF14-84	Sun et al., 2021	Yes	1	116.09	43.93	4.33	1.0601	29.749	40.9412	3.64414	12.4827	15.0292	0.191267	9.17075	9.74455	4.57028	2.72807	1.1778	0.32	99.68	4.63787	4.19663	3.50242	3.02445
CF14-79	Sun et al., 2021	Yes	1	116.09	43.93	4.76	1.05434	19.5738	41.7202	3.04314	12.6145	13.5989	0.190824	11.5097	10.0936	3.69596	2.14928	0.903904	0.48	99.52	3.82805	3.42283	2.9023	2.48834
CF14-53	Sun et al., 2021	Yes	1	116.09	43.93	3.9	1.05106	20.5591	42.4757	3.5153	12.8021	14.0436	0.181305	9.76024	9.99191	3.83762	2.04472	1.03747	0.31	99.69	4.14671	3.775	3.15096	2.72627
CF14-49	Sun et al., 2021	Yes	1	116.09	43.93	4.43	1.07998	16.0113	43.5275	2.8958	13.4936	12.9084	0.180988	8.10423	10.437	3.31811	1.76966	0.864719	2.5	97.5	3.97164	3.60507	3.02567	2.63523
CF14-44	Sun et al., 2021	Yes	1	116.09	43.93	4.59	1.05138	22.6123	44.3897	2.78381	13.2433	13.8851	0.181553	8.61368	9.49118	4.06477	2.09794	1.05906	0.19	99.81	4.35135	3.97357	3.33562	2.89613
CF14-42	Sun et al., 2021	Yes	1	116.09	43.93	4.58	1.05356	20.3919	43.4912	3.08998	13.0846	13.956	0.191237	8.88747	9.87385	4.21727	1.75132	1.09709	0.36	99.64	4.2782	3.89999	3.2613	2.82084
SW11-07	Sun et al., 2021	Yes	18.6	118.83	36.71		1.07568	25.0344	43.7395	2.43737	13.9115	12.4451	0.219682	7.7654	9.55069	4.26938	1.6004	1.28728	2.54885	99.7752	3.8936	3.52647	2.94221	2.54469
SW11-05	Sun et al., 2021	Yes	18.6	118.83	36.71		1.02172	26.8192	43.9056	2.38533	13.8397	12.1809	0.227079	7.82216	8.49234	5.1997	1.98945	1.27707	2.42758	99.7469	3.97192	3.60536	3.06817	2.63143
SW11-04	Sun et al., 2021	Yes	18.6	118.83	36.71		1.04049	26.3145	43.8994	2.35739	13.8784	11.9254	0.217285	7.79546	8.50585	4.25441	2.65008	1.26005	3.0449	99.7887	3.87504	3.51691	2.99485	2.65958
SW11-02	Sun et al., 2021	Yes	18.6	118.83	36.71		1.06405	24.9752	43.6057	2.36195	13.9032	11.7934	0.203327	7.48262	8.83188	3.91848	2.68076	1.25451	3.78656	99.8224	3.83674	3.47972	3.00218	2.62637
07CL09	Sun et al., 2021	Yes	18.6	118.83	36.71	5.94	0.976902	27.3347	42.7064	2.73629	13.7828	12.0279	0.222957	9.15137	8.7764	4.82398	2.21944	1.08438	2.11809	99.65	3.63363	3.3244	2.80871	2.43651
07CL04	Sun et al., 2021	Yes	18.6	118.83	36.71	5.74	0.986542	26.6422	43.5245	2.59666	14.0281	12.7867	0.243437	7.86098	8.287	4.88902	3.01253	1.13604	1.77506	100.14	4.12025	3.75723	3.18971	2.77374
07CL03	Sun et al., 2021	Yes	18.6	118.83	36.71	5.96	1.02411	31.611	43.0103	2.5867	13.8566	12.888	0.253598	7.90213	7.9427	5.50816	2.94174	1.11583	1.70418	99.71	4.24106	3.82777	3.25476	2.83387
DMN1107	Sun et al., 2021	Yes	8	118.96	42.27	4.44	0.991767		49.9745	2.25427	11.9976	9.7137	0.169225	9.46112	7.98805	3.22114	1.33121	0.40995	3.47928	96.5207	3.80314	3.55266	3.09845	2.79594
SZ-1/4A	Teng et al., 2017	Yes	127.01	116.37	40.3		1.0769	16.0079	42.82	1.86	8.76	12.843	0.16	16.97	10.03	0.73	1.67	0.76	1.03	99.06	5.86775	5.86775	5.86775	5.86775
TL-6	Wan et al., 2019	Yes	162	120.58	40.38	-1.4	0.944744	18.9166	46.36	1.43	10.75	10.332	0.18	14.76	9.36	2.46	0.69	0.39	1.82	99.68	4.67257	4.67257	4.67257	4.67257
TL-10	Wan et al., 2019	Yes	140	120.58	40.38		0.94375	17.1877	47.34	1.61	12.11	10.071	0.17	11.88	9.06	3.09	1.31	0.44	1.5	99.7	4.63889	4.63889	4.63889	4.63889
TL-9	Wan et al., 2019	Yes	140	120.58	40.38		0.962661	20.5243	47.16	1.42	14.02	11.025	0.16	7.74	7.56	3.04	2.39	0.97	3.14	99.85	5.29835	5.29835	5.29835	5.29835
TL-5	Wan et al., 2019	Yes	139	120.58	40.38		0.99685	13.63	45.95	1.54	12.85	10.89	0.17	10.77	8.77	2.48	1.32	0.7	3.03	99.68	4.83988	4.83988	4.83988	4.83988
DG3	Wang et al., 2006	Yes	125.2	113.82	36.08	-13.5	1.09689	10.9732	52.98	0.58	13.27	8.001	0.12	9.8	7.86	2.49	1.83	0.24	2.28	99.91	4.17047	4.17047	4.17047	4.17047
DG1	Wang et al., 2006	Yes	125.2	113.82	36.08	-13.09	1.02934	12.2542	52.92	0.56	13.31	7.768	0.12	9.78	7.9	2.37	1.89	0.24	2.19	99.49	4.07345	4.07345	4.07345	4.07345
20HD8	Wang et al., 2006	Yes	125.2	113.82	36.08	-13.54	0.957954		53.28	0.61	13.32	8.284	0.14	9.81	8.13	3.74	1.06	0.18	1.07	99.97	1.52831	1.52831	1.52831	1.52831
05HF18	Wang et al., 2011	Yes	38.3	117.26	31.85	5	0.943118	20.0689	43.76	1.87	13.4	11.304	0.17	10.83	8.4	5.72	1.86	0.73	1.03	100.33	3.49715	3.18522	2.65832	2.31354
05HF17	Wang et al., 2011	Yes	38.3	117.26	31.85	3.85	0.923784	20.1185	44.83	1.89	13.35	10.926	0.17	10.06	8.46	5.68	2.05	0.74	0.97	100.34	3.58525	3.27022	2.78186	2.43393
05HF15	Wang et al., 2011	Yes	38.3	117.26	31.85	5.84	0.967968	29.7519	42.68	2.09	12.63	11.835	0.16	11.61	7.79	5.73	2.27	0.83	1.3	100.24	3.70226	3.39002	2.86894	2.49219
05HF10	Wang et al., 2011	Yes	38.3	117.26	31.85	6.2	0.985324	29.2352	42.88	2.04	12.91	11.808	0.16	11.03	7.85	5.44	2.26	0.85	1.57	100.11	3.72127	3.36513	2.84473	2.46744
05HF09	Wang et al., 2011	Yes	36.2	117.26	31.85	3.39	1.01424	11.5108	46.16	1.97	14.38	10.467	0.15	8.93	8.9	4.41	1.76	0.44	1.18	99.91	3.35336	3.04093	2.59586	2.28772
05HF08	Wang et al., 2011	Yes	36.2	117.26	31.85	3.43	1.0155	11.4047	45.96	1.94	13.73	10.989	0.16	10.27	8.95	4.5	1.6	0.42	0.68	100.42	3.42166	3.10696	2.65863	2.34521
05HF04	Wang et al., 2011	Yes	36.2	117.26	31.85	3.51	1.06376	11.026	45.65	1.75	13.76	10.719	0.16	10.68	9.09	4.27	1.34	0.38	1.03	100.02	3.27175	2.95637	2.50304	2.18434
05HF02	Wang et al., 2011	Yes	36.2	117.26	31.85	3.52	0.997897	10.7062	45.73	1.69	13.24	11.016	0.16	11.54	9.21	3.57	1.51	0.36	0.8	100.05	3.32943	3.05886	2.60698	2.28314
17XS27	Wang et al., 2020a	Yes	131	120.5	37.46	-15.2	0.961841	21.0507	50.874	0.798	14.26	6.7689	0.121	9.248	7.335	2.907	2.272	0.257	3.53	99.123	1.27481	1.27481	1.27481	1.27481
SCYM-2	Xiong et al., 2017	Yes	167	119.075	40.6467	-7.4	0.957095	37.4961	49.09	1.05	11.7	7.155	0.113858	13.69	5.88	1.3	4.98	0.63	2.42	99.31	4.14914	4.14914	4.14914	4.14914
SCYM-16	Xiong et al., 2017	Yes	167	119.075	40.6467	-0.4	0.938932	33.7526	48.49	1.23	12.37	7.155	0.102756	9.67	8.16	2.5	4.21	0.99	3.06	99.11	4.08026	4.08026	4.08026	4.08026
YN-27	Xu et al., 2004	Yes	127	118.32	35.45	-14.3	1.06223	38.5443	50.93	0.87	14.31	8.208	0.15	8.92	10.46	2.91	1.5	0.65	0.71	100.55	1.81102	1.81102	1.81102	1.81102
YN-26	Xu et al., 2004	Yes	127	118.32	35.45	-14.4	1.01215	33.569	50.24	0.98	14.4	8.514	0.15	8.81	10.64	2.83	1.74	0.77	0.9	100.93	2.07143	2.07143	2.07143	2.07143
YN-31	Xu et al., 2004	Yes	127	118.32	35.45	-12.6	0.97562	44.3758	51.76	1	14.36	7.749	0.14	7.52	9.47	3.33	2.97	0.74	0.58	100.48	1.80779	1.80779	1.80779	1.80779
ZKD08-50	Xu et al., 2012	Yes	134	115.95	39.73		1.03157	19.4287	50.02	0.78	10.84	8.784	0.17	12.55	8.54	1.74	1.67	0.42	3.91	99.7	1.85968	1.85968	1.85968	1.85968
JG-4	Yang and Li, 2008	Yes	106	121.83	42.25	4.74	0.987537	12.941	43.89	2.98	15.2	10.665	0.18	8.86	10.46	3.33	1.46	0.65	1.57	100.42	2.91329	2.61554	2.23765	1.95163
WHC-4	Yang and Li, 2008	Yes	106	121.83	42.25	4.59	1.01389	12.4253	43.31	2.94	14.99	10.71	0.17	8.32	9.5	3.94	0.76	0.71	2.71	99.26	3.04732	2.74288	2.30832	1.96107
WHC-3	Yang and Li, 2008	Yes	106	121.83	42.25	4.56	1.01162	12.5527	43.37	2.97	15.12	10.962	0.18	8.54	9.78	3.95	0.74	0.71	3.17	100.7	3.01805	2.71433	2.28085	1.93474
WHC-2	Yang and Li, 2008	Yes	106	121.83	42.25	5.74	0.983856	12.5482	42.71	2.96	14.88	10.998	0.17	8.39	9.67	3.76	0.7	0.71	3.19	99.35	3.05492	2.75091	2.31751	1.97123
WHC-1	Yang and Li, 2008	Yes	106	121.83	42.25	5.51	1.00394	12.3702	43.57	2.99	15.14	11.088	0.18	8.43	9.76	3.91	0.8	0.73	2.57	100.38	3.06786	2.76374	2.33055	1.98502
JG-5	Yang and Li, 2008	Yes	106	121.83	42.25	4.3	0.991126	12.6516	45.75	2.96	15.06	10.467	0.17	8.36	10.22	3.04	1.4	0.62	1.38	100.59	3.02693	2.76593	2.37726	2.11104
JG-3	Yang and Li, 2008	Yes	106	121.83	42.25	4.36	1.0108	12.691	45.19	2.97	15	10.593	0.17	8.49	10.38	3	1.37	0.61	1.42	100.37	3.0385	2.77843	2.34813	2.08476
JG-2	Yang and Li, 2008	Yes	106	121.83	42.25	4.44	1.00954	12.5721	44.63	2.96	14.94	10.476	0.17	8.52	10.27	3.06	1.37	0.63	1.35	99.54	2.97293	2.71402	2.32892	2.03627
JG-1	Yang and Li, 2008	Yes	106	121.83	42.25	4.75	0.976712	12.78	45.18	2.97	14.98	10.611	0.17	8.4	10.39	2.98	1.37	0.63	1.35	100.21	3.03515	2.77468	2.38472	2.09076
QT-19	Yang et al., 2008	Yes	134	118.4	35.42	-14.97	0.702741	23.6159	49.1	1.42	6.24	10.089	0.17	13.09	12.98	1.14	2.51	0.79	1.01	99.66	2.94263	2.94263	2.94263	2.94263
07ZP07	Yang et al., 2012a	Yes	123	117.74	36.86	-10.4	0.922788	8.73418	51.33	0.73	11.76	8.523	0.16	11.74	7.52	2.51	2.03	0.31	2.02	99.58	1.75669	1.75669	1.75669	1.75669
07ZP03	Yang et al., 2012a	Yes	120	117.74	36.86	-10.5	0.905507	8.45267	51.03	0.71	11.43	8.874	0.16	12.46	7.72	2.4	1.85	0.29	1.83	99.74	1.9002	1.9002	1.9002	1.9002
07JN38	Yang et al., 2012a	Yes	125	116.75	36.55	-9.7	1.09143	4.12039	48.85	0.44	12.59	8.901	0.17	13.55	9.09	1.94	0.53	0.08	2.38	99.51	2.02317	2.02317	2.02317	2.02317
07JN35	Yang et al., 2012a	Yes	120	116.75	36.55		0.994497	5.52743	51.91	0.67	14.08	8.955	0.17	9.28	8.71	2.54	1.14	0.16	1.19	99.79	1.76415	1.76415	1.76415	1.76415
07JN32	Yang et al., 2012a	Yes	120	116.75	36.55		0.996679	6.66898	52.09	0.7	14.3	8.253	0.15	8.38	8.07	2.9	1.23	0.19	2.39	99.57	1.49524	1.49524	1.49524	1.49524
07JN14	Yang et al., 2012a	Yes	119	116.75	36.55	-10	0.891198	2.37478	47.77	0.37	8.62	10.782	0.22	16.09	10.97	1.11	0.29	0.05	2.04	99.51	5.44016	5.44016	5.44016	5.44016
07ZB03	Yang et al., 2012b	Yes	134	117.86	36.49	-5	0.91373	14.4958	52.02	1.02	12.09	8.415	0.15	9.2	6.77	2.99	2.32	0.39	3.11	99.41	1.67565	1.67565	1.67565	1.67565
07LW05	Yang et al., 2012b	Yes	134	117.66	36.2	-9.1	1.00078	2.43532	48.02	0.56	12.22	9.747	0.2	14.2	9.82	0.91	0.08	0.11	2.03	98.98	2.29624	2.29624	2.29624	2.29624
07LW01	Yang et al., 2012b	Yes	134	117.66	36.2	-6.3	1.0001	3.58709	47.43	0.66	11.03	9.999	0.19	14.94	10.01	1.44	0.17	0.07	2.21	99.26	4.40432	4.40432	4.40432	4.40432
07YN09	Yang et al., 2012b	Yes	131	118.47	35.55	-13.4	0.822159	40.159	51.54	1.15	14.31	7.479	0.14	7.79	8.68	3.09	2.76	0.67	1.09	99.53	1.60414	1.60414	1.60414	1.60414
WNS-2	Ying et al., 2005	Yes	127	117.63	36.75	-11.8	0.914718	5.91355	53.5	0.71	13.9	8.595	0.12	8.26	8.5	2.49	1.69	0.26	1.42	99.9	4.42652	4.42652	4.42652	4.42652
JG-09	Zhang and Zheng, 2003	Yes	100.4	121.66	42.01	4.1	1.00332	12.9072	44.82	2.93	14.81	10.575	0.17	8.3	10.62	3.03	1.78	0.63	1.17	100	3.10757	2.80622	2.42522	2.13961
JG-08	Zhang and Zheng, 2003	Yes	100.4	121.66	42.01	4.3	1.00015	11.9415	45.5	2.85	14.37	10.359	0.17	8.16	10.27	3.09	1.87	0.63	1.52	99.9	3.21968	2.95791	2.56765	2.28085
JG-07	Zhang and Zheng, 2003	Yes	100.4	121.66	42.01	4.4	1.00983	12.0117	43.4	2.95	14.88	10.602	0.17	8.39	10.32	3.33	1.91	0.66	1.34	99.1	3.04488	2.74872	2.37336	2.08943
JG-06	Zhang and Zheng, 2003	Yes	100.4	121.66	42.01	4.2	1.02778	12.9781	46.07	2.88	14.36	10.242	0.17	8.06	10.07	3.18	1.8	0.63	1.47	100.1	3.25892	2.99516	2.5616	2.31093
JG-05	Zhang and Zheng, 2003	Yes	100.4	121.66	42.01	4.5	0.979392	12.7059	45.01	2.95	14.59	10.602	0.17	8.3	10.32	3.33	1.91	0.66	1.38	100.4	3.17321	2.91421	2.5277	2.24029
JG-04	Zhang and Zheng, 2003	Yes	100.4	121.66	42.01	4.4	0.98691	12.1778	45.92	2.85	14.27	10.233	0.17	8.09	10.11	3.03	1.8	0.62	1.57	99.8	3.22923	2.96557	2.5753	2.31751
JG-03	Zhang and Zheng, 2003	Yes	100.4	121.66	42.01	4.1	0.972712	12.2027	44.82	2.93	14.81	10.512	0.17	8.38	10.52	3	1.93	0.65	1.25	100.1	3.08696	2.83045	2.41099	2.16384
JG-02	Zhang and Zheng, 2003	Yes	100.4	121.66	42.01	3.9	0.978692	12.7754	45.48	2.89	14.51	10.359	0.17	8.25	10.34	2.7	1.93	0.62	1.55	100	3.16841	2.90929	2.52578	2.24291
JG-01	Zhang and Zheng, 2003	Yes	100.4	121.66	42.01	4.8	0.996077	12.3544	44.84	2.92	14.79	10.413	0.17	8.31	10.27	3.19	1.88	0.64	1.33	99.9	3.0912	2.83387	2.41325	2.16782
FC7	Zhang et al., 2002	Yes	124.9	118.2	35.3	-14.4	0.8763	48.3495	48.47	1.11	12.68	8.23	0.1	11.46	9.77	2.67	0.92	0.79	3.59	99.8	3.77444	3.77444	3.77444	3.77444
FC6–1	Zhang et al., 2002	Yes	124.9	118.2	35.3	-14.1	0.87404	39.0032	47.96	1.1	13.11	7.79	0.12	11.18	10.03	3.03	1.05	0.81	3.85	100	3.52329	3.52329	3.52329	3.52329
FC5–1	Zhang et al., 2002	Yes	124.9	118.2	35.3	-14.2	0.910579	44.6573	48.7	1.09	12.86	7.82	0.12	11.77	9.64	2.49	0.93	0.79	3.61	99.8	3.55006	3.55006	3.55006	3.55006
FC1–2	Zhang et al., 2002	Yes	124.9	118.2	35.3	-13.4	0.873101	47.8547	49.36	1.11	14.42	8.07	0.12	8.29	8.73	2.96	1.58	0.92	3.82	99.4	3.81713	3.81713	3.81713	3.81713
WLHD-02	Zhang et al., 2003	Yes	142.4	121.52	41.95	-5.96	0.964242	12.0592	52.47	1.08	14.8	7.119	0.12	8.27	7.01	3.71	1.89	0.3	1.66	99.2	1.31605	1.31605	1.31605	1.31605
WLHD-04	Zhang et al., 2003	Yes	142.4	121.52	41.95	-6.77	0.960206	11.2856	53.7	1.09	14.63	7.155	0.11	8.28	6.9	3.65	1.87	0.32	1.5	100	3.82497	3.82497	3.82497	3.82497
WLHD-01	Zhang et al., 2003	Yes	142.4	121.52	41.95	-6.05	0.961208	12.357	52.96	1.11	14.8	7.218	0.11	8.06	7.28	3.68	1.84	0.31	1.53	99.7	3.80566	3.80566	3.80566	3.80566
SYb-7	Zhang et al., 2019	Yes	130	112.59	34.68		1.09873	10.6638	50.43	0.46	9.26	10.143	0.2	11.7	10.78	1.93	0.99	0.29	2.32	99.63	2.45533	2.45533	2.45533	2.45533
SYb-6R	Zhang et al., 2019	Yes	130	112.59	34.68		0.867873	4.92569	46.38	0.95	13.28	11.421	0.29	10.17	8.7	2.33	1.9	0.33	2.69	99.71	5.07291	5.07291	5.07291	5.07291
SYb-6	Zhang et al., 2019	Yes	130	112.59	34.68		0.877703	4.98952	46.36	0.95	13.28	11.403	0.29	10.13	8.69	2.35	1.91	0.34	2.67	99.64	5.06952	5.06952	5.06952	5.06952
SYb-5	Zhang et al., 2019	Yes	130	112.59	34.68		0.882241	1.41386	42.25	1.27	14.39	12.888	0.25	11.71	7.18	1.94	2.54	0.1	3.56	99.51	4.93034	4.93034	4.93034	4.93034
SYb-3	Zhang et al., 2019	Yes	130	112.59	34.68		0.837821	6.39262	47.83	0.92	12.41	13.374	0.23	8.11	10	3.07	1.27	0.09	0.75	99.54	6.72265	6.72265	6.72265	6.72265
16PJ20–8	Zhou et al., 2021	Yes	129	125.36	41.27		0.99501	11.8882	49.27	1.47	13.8	9.522	0.16	9.76	8.46	2.48	1.46	0.29	1.66	99.38	2.44681	2.44681	2.44681	2.44681
16PJ20–5	Zhou et al., 2021	Yes	129	125.36	41.27	-1.14	0.993268	11.0705	49.66	1.5	14.34	9.324	0.16	8.27	8.66	2.88	1.97	0.3	0.95	99.05	2.4682	2.4682	2.4682	2.4682
16PJ10–4	Zhou et al., 2021	Yes	132	126.7	42.05	-1.3	0.93096	10.6119	49.87	1.54	14.68	9.405	0.15	8.12	8.53	2.99	1.84	0.28	0.9	99.34	4.41219	4.41219	4.41219	4.41219
a: We adopted Fo = 92 for magmas with age >110 Ma and for age <110 Ma magmas, the mantle olvine Fo was assumed to be 89.
b: We adopted Fo = 92 for magmas with age >110 Ma and for age <110 Ma magmas, the mantle olvine Fo was assumed to be 88.
c: We adopted Fo = 92 for magmas with age >110 Ma and for age <110 Ma magmas, the mantle olvine Fo was assumed to be 86.
d: We adopted Fo = 92 for magmas with age >110 Ma and for age <110 Ma magmas, the mantle olvine Fo was assumed to be 84.

## Sheet: Kimberlite
Sample ID with citation†	Age	Location	SiO2	TiO2	Al2O3	Cr2O3	FeO	MnO	MgO	CaO	Na2O	K2O	P2O5	CO2	H2O	Calculated Pressure (Gpa)
L42-03 [14143]	465	Fuxian, Liaoning Province	34.7	1.73	3.1	9.63	0.23	27.8	9.87	0.05	0.58	0.53				6.3
L42-06 [14143]	465	Fuxian, Liaoning Province	36.6	2.11	3.57	9.18	0.2	32.4	2.08	0.06	1.25	0.63				5.9
L42-07 [14143]	465	Fuxian, Liaoning Province	34	1.96	3.25	9.72	0.25	28.4	8.94	0.05	0.17	0.42				6
L42-11 [14143]	465	Fuxian, Liaoning Province	36	2.38	3.66	12.87	0.12	28.9	2.12	0.09	2.08	0.55				8.9
L50-2003 [14143]	465	Fuxian, Liaoning Province	35.1	1.21	2.94	7.61	0.09	25.4	10.4	0.09	0.69	0.59				5.5
L50-2006 [14143]	465	Fuxian, Liaoning Province	31.8	1.4	2.2	8.53	0.12	28.6	9.27	0.08	0.69	0.71				6.2
L50-01 [14143]	465	Fuxian, Liaoning Province	31.5	1.43	2.18	9.27	0.11	27.7	9.59	0.08	0.7	0.81				7
L50-04 [14143]	465	Fuxian, Liaoning Province	37.9	1.57	2.4	8.87	0.09	32.3	2.71	0.08	0.54	0.31				7.4
L50-05 [14143]	465	Fuxian, Liaoning Province	35.1	1.39	2.13	8.85	0.1	27.3	8.54	0.08	1.08	0.63				7.7
L50-08 [14143]	465	Fuxian, Liaoning Province	31.8	1.39	2.45	8.54	0.1	24.8	11.9	0.09	1.04	0.82				6.4
L50-10 [14143]	465	Fuxian, Liaoning Province	35.7	1.06	2.86	8.76	0.27	29.6	4.59	0.05	0.85	0.66				6.5
L50-17 [14143]	465	Fuxian, Liaoning Province	33.8	1.37	2.12	9.81	0.11	28.7	7.51	0.08	1.1	0.43				8.4
1 [16701]	465	Fuxian, Liaoning Province	35.57	0.45	4.18	0.2	9.05	0.14	31.14	3.25	0.04	0.03	2.11	0.38	12.26	4.7
2 [16701]	465	Fuxian, Liaoning Province	34.46	0.56	4.31	0.22	9.67	0.13	30.62	3.89	0.04	0.03	2.54	0.22	12.35	4.9
3 [16701]	465	Fuxian, Liaoning Province	33.49	0.75	4.77	0.18	10.3	0.16	31.85	3.7	0.21	0.06	2.33	0.2	11.24	4.7
4 [16701]	465	Fuxian, Liaoning Province	34.1	0.56	3.19	8.01	0.1	29.25	7.04	0.05	0.06	2.24	8.05	5.67		4.6
5 [16701]	465	Fuxian, Liaoning Province	35.51	0.4	4.75	0.35	12.2	0.15	26.56	4.79	0.03	0.06	3.5	1.29	9.12	6.3
6 [16701]	465	Fuxian, Liaoning Province	36.04	0.37	5.23	0.27	10.29	0.2	28	3.62	0.08	0.06	2.31	2.03	10.2	5.3
SL-2001 [14143]	465	Mengyin, Shandong Province	36.6	0.83	0.82	7	0.1	32.3	5.95	0.06	0.1	0.41				8.1
95-4-4 [16617]	465	Mengyin, Shandong Province	33.67	0.94	1.2	7.53	0.09	33.19	6.26	0.05	0.11	0.5	3.74	11.34		6.4
35065 [16617]	465	Mengyin, Shandong Province	35.27	1.12	2.45	7.34	0.11	31.65	5.99	0.02	0.89	0.78	2.89	10.86		4.9
REFERENCE
Sun, C., and Dasgupta, R., 2020, Thermobarometry of CO2-rich, silica-undersaturated melts constrains cratonic lithosphere thinning through time in areas of kimberlitic magmatism: Earth and Planetary Science Letters, v. 550.
† Contents in brackets are citation ID's from GEOROC

## Sheet: Mafic magma Mg isotope
Sample ID	Reference	Location	On-craton	Age (Ma)	δ26Mg
07FC-1	Li et al., 2017	Fangcheng	Yes	120	-0.34
07FC-2	Li et al., 2017	Fangcheng	Yes	120	-0.31
07FC-7	Li et al., 2017	Fangcheng	Yes	120	-0.33
SFX28	Li et al., 2017	Feixian	Yes	120	-0.26
SFX30	Li et al., 2017	Feixian	Yes	120	-0.26
SFX-49	Li et al., 2017	Feixian	Yes	120	-0.27
DZH-88-1	Li et al., 2017	Dabieshan	Yes	125	-0.25
DZH-88-5	Li et al., 2017	Dabieshan	Yes	125	-0.33
01SHC09	Li et al., 2017	Dabieshan	Yes	125	-0.35
01SC01	Li et al., 2017	Dabieshan	Yes	125	-0.32
01SHC05	Li et al., 2017	Dabieshan	Yes	125	-0.35
11ZJP-1	Li et al., 2017	Dabieshan	Yes	125	-0.34
11DSC-1	Li et al., 2017	Dabieshan	Yes	125	-0.23
11DSC-2	Li et al., 2017	Dabieshan	Yes	125	-0.26
5-1.0	Li et al., 2017	Dabieshan	Yes	1.54	-0.51
3-2.1	Li et al., 2017	Dabieshan	Yes	1.54	-0.42
I-26-1	Li et al., 2017	Dabieshan	Yes	1.54	-0.43
Jin-3	Li et al., 2017	Dabieshan	Yes	1.54	-0.45
D2	Li et al., 2017	Hannuoba	Yes	18	-0.46
D8	Li et al., 2017	Hannuoba	Yes	18	-0.49
D11	Li et al., 2017	Hannuoba	Yes	18	-0.48
D15	Li et al., 2017	Hannuoba	Yes	18	-0.51
D17	Li et al., 2017	Hannuoba	Yes	18	-0.49
MO68-1B	Li et al., 2017	Jiaozhou	Yes	74	-0.39
MO68-2B	Li et al., 2017	Jiaozhou	Yes	74	-0.4
MO68-3B	Li et al., 2017	Jiaozhou	Yes	74	-0.38
MO68-4B	Li et al., 2017	Jiaozhou	Yes	74	-0.43
13PMS1	Li et al., 2017	Anfengshan	No	8.15	-0.52
13PMS2	Li et al., 2017	Anfengshan	No	8.15	-0.53
13PMS3	Li et al., 2017	Anfengshan	No	8.15	-0.52
13PMS6	Li et al., 2017	Anfengshan	No	8.15	-0.52
13PMS8	Li et al., 2017	Anfengshan	No	8.15	-0.6
13AFS1	Li et al., 2017	Anfengshan	No	8.15	-0.52
13AFS2	Li et al., 2017	Anfengshan	No	8.15	-0.52
13AFS3	Li et al., 2017	Anfengshan	No	8.15	-0.59
13AFS4	Li et al., 2017	Anfengshan	No	8.15	-0.56
BBT-1	Li et al., 2017	Shuangliao	No	46.3	-0.36
BBT-5	Li et al., 2017	Shuangliao	No	46.3	-0.33
BLS-4	Li et al., 2017	Shuangliao	No	46.3	-0.36
BLS-6	Li et al., 2017	Shuangliao	No	46.3	-0.39
DHLB-4	Li et al., 2017	Shuangliao	No	46.3	-0.5
DHLB-9	Li et al., 2017	Shuangliao	No	46.3	-0.38
JG-01	Yang et al., 2012	Fuxin	Yes	103	-0.46
JG-02	Yang et al., 2012	Fuxin	Yes	103	-0.52
JG-03	Yang et al., 2012	Fuxin	Yes	103	-0.48
JG-04	Yang et al., 2012	Fuxin	Yes	103	-0.53
JG-05	Yang et al., 2012	Fuxin	Yes	103	-0.46
JG-06	Yang et al., 2012	Fuxin	Yes	103	-0.47
JG-07	Yang et al., 2012	Fuxin	Yes	103	-0.55
JG-08	Yang et al., 2012	Fuxin	Yes	103	-0.49
JG-09	Yang et al., 2012	Fuxin	Yes	103	-0.49
HBJ4-1	Yang et al., 2012	Yixian	Yes	122.5	-0.25
HBJ4-2	Yang et al., 2012	Yixian	Yes	122.5	-0.28
HBJ4-3	Yang et al., 2012	Yixian	Yes	122.5	-0.27
SHT-14	Yang et al., 2012	Yixian	Yes	122.5	-0.26
SHT-3	Yang et al., 2012	Yixian	Yes	122.5	-0.31
FS-1	Huang and Xiao, 2016	Fanshi	Yes	25.3	-0.44
FS-8	Huang and Xiao, 2016	Fanshi	Yes	25.3	-0.46
FS-10	Huang and Xiao, 2016	Fanshi	Yes	25.3	-0.46
FS-30	Huang and Xiao, 2016	Fanshi	Yes	25.3	-0.44
FS-32	Huang and Xiao, 2016	Fanshi	Yes	25.3	-0.49
FS-33	Huang and Xiao, 2016	Fanshi	Yes	25.3	-0.48
HHL-1	Huang and Xiao, 2016	Fanshi	Yes	25.3	-0.43
HHL-2	Huang and Xiao, 2016	Fanshi	Yes	25.3	-0.52
FS-2	Huang and Xiao, 2016	Fanshi	Yes	25.3	-0.3
FS-3	Huang and Xiao, 2016	Fanshi	Yes	25.3	-0.53
FS-9	Huang and Xiao, 2016	Fanshi	Yes	25.3	-0.46
FS-36	Huang and Xiao, 2016	Fanshi	Yes	25.3	-0.51
FS-38	Huang and Xiao, 2016	Fanshi	Yes	25.3	-0.45
FHS-1	Huang and Xiao, 2016	Xiyang-Pingding	Yes	7.2	-0.44
GB-2	Huang and Xiao, 2016	Xiyang-Pingding	Yes	7.2	-0.5
JD-1	Huang and Xiao, 2016	Xiyang-Pingding	Yes	7.2	-0.46
JX-1	Huang and Xiao, 2016	Xiyang-Pingding	Yes	7.2	-0.49
JX-3	Huang and Xiao, 2016	Xiyang-Pingding	Yes	7.2	-0.46
MAS-1	Huang and Xiao, 2016	Xiyang-Pingding	Yes	7.2	-0.54
ZQ-1	Huang and Xiao, 2016	Zuoquan	Yes	5.6	-0.42
ZQ-4	Huang and Xiao, 2016	Zuoquan	Yes	5.6	-0.42
YQ1	Tian et al., 2016	Wudalianchi	No	0.5	-0.52
YQ3	Tian et al., 2016	Wudalianchi	No	0.5	-0.49
YQ4	Tian et al., 2016	Wudalianchi	No	0.5	-0.48
YQ6	Tian et al., 2016	Wudalianchi	No	0.5	-0.51
YQ7	Tian et al., 2016	Wudalianchi	No	0.5	-0.54
YQ8	Tian et al., 2016	Wudalianchi	No	0.5	-0.48
LHS1	Tian et al., 2016	Wudalianchi	No	0.5	-0.49
LHS3	Tian et al., 2016	Wudalianchi	No	0.5	-0.52
LHS4	Tian et al., 2016	Wudalianchi	No	0.5	-0.52
LHS6	Tian et al., 2016	Wudalianchi	No	0.5	-0.47
HSS2	Tian et al., 2016	Wudalianchi	No	0.5	-0.49
HSS5	Tian et al., 2016	Wudalianchi	No	0.5	-0.46
HSS6	Tian et al., 2016	Wudalianchi	No	0.5	-0.48
HSS8	Tian et al., 2016	Wudalianchi	No	0.5	-0.48
KD1	Tian et al., 2016	Erkeshan	No	0.5	-0.55
KD3	Tian et al., 2016	Erkeshan	No	0.5	-0.57
KD4	Tian et al., 2016	Erkeshan	No	0.5	-0.55
KD5	Tian et al., 2016	Erkeshan	No	0.5	-0.54
13PMS1	Huang et al., 2015	Pingmingshan	No	9.8	-0.52
13PMS2	Huang et al., 2015	Pingmingshan	No	9.8	-0.53
13PMS3	Huang et al., 2015	Pingmingshan	No	9.8	-0.52
13PMS6	Huang et al., 2015	Pingmingshan	No	9.8	-0.52
13PMS8	Huang et al., 2015	Pingmingshan	No	9.8	-0.6
13AFS1	Huang et al., 2015	Anfengshan	No	5.2	-0.52
13AFS2	Huang et al., 2015	Anfengshan	No	5.2	-0.52
13AFS3	Huang et al., 2015	Anfengshan	No	5.2	-0.59
13AFS4	Huang et al., 2015	Anfengshan	No	5.2	-0.56
10FS6	Huang et al., 2015	Fangshan	No	3.2	-0.41
10FS8	Huang et al., 2015	Fangshan	No	3.2	-0.42
10FS9	Huang et al., 2015	Fangshan	No	3.2	-0.43
10FS10	Huang et al., 2015	Fangshan	No	3.2	-0.42
10FS11	Huang et al., 2015	Fangshan	No	3.2	-0.4
10CR1	Huang et al., 2015	Chongren	No	26.4	-0.37
10CR2	Huang et al., 2015	Longyou	No	9.2	-0.35
10LYSK13	Huang et al., 2015	Longyou	No	9.2	-0.41
REFERENCES
Huang, J., Li, S.-G., Xiao, Y., Ke, S., Li, W.-Y., and Tian, Y., 2015, Origin of low δ 26 Mg Cenozoic basalts from South China Block and their geodynamic implications: Geochimica et Cosmochimica Acta, v. 164, p. 298-317.
Huang, J., and Xiao, Y., 2016, Mg-Sr isotopes of low-δ26Mg basalts tracing recycled carbonate species: Implication for the initial melting depth of the carbonated mantle in Eastern China: International Geology Review, v. 58, no. 11, p. 1350-1362.
Li, S.-G., Yang, W., Ke, S., Meng, X., Tian, H., Xu, L., He, Y., Huang, J., Wang, X.-C., Xia, Q., Sun, W., Yang, X., Ren, Z.-Y., Wei, H., Liu, Y., Meng, F., and Yan, J., 2017, Deep carbon cycles constrained by a large-scale mantle Mg isotope anomaly in eastern China: National Science Review, v. 4, no. 1, p. 111-120.
Tian, H.-C., Yang, W., Li, S.-G., Ke, S., and Chu, Z.-Y., 2016, Origin of low δ26Mg basalts with EM-I component: Evidence for interaction between enriched lithosphere and carbonated asthenosphere: Geochimica et Cosmochimica Acta, v. 188, p. 93-105.
Yang, W., Teng, F.-Z., Zhang, H.-F., and Li, S.-G., 2012, Magnesium isotopic systematics of continental basalts from the North China craton: Implications for tracing subducted carbonate in the mantle: Chemical Geology, v. 328, p. 185-194.

## Sheet: Felsic magma age
Sample ID	Reference	Age (Ma)
10YS02	Li et al., 2012	120
10YS03	Li et al., 2012	120
10G07	Li et al., 2012	120
10G09P	Li et al., 2012	120
08G46	Li et al., 2012	120
08G47	Li et al., 2012	120
CW1/1	He and Santosh, 2014	130
CW1/2	He and Santosh, 2014	130
MP1/1	He and Santosh, 2014	130
CW3/1	He and Santosh, 2014	130
TS-4	Xu et al., 2004	177
TS-5	Xu et al., 2004	177
TS-6	Xu et al., 2004	177
TS-9	Xu et al., 2004	177
TS-13	Xu et al., 2004	177
TS-14	Xu et al., 2004	177
LW-7	Xu et al., 2004	130
LW-8	Xu et al., 2004	130
LW-9	Xu et al., 2004	130
LW-10	Xu et al., 2004	130
LW-12	Xu et al., 2004	130
LW-13	Xu et al., 2004	130
LW-14	Xu et al., 2004	130
LW-15	Xu et al., 2004	130
LW-16	Xu et al., 2004	130
LW-17	Xu et al., 2004	130
YN-4	Xu et al., 2004	126
YN-5	Xu et al., 2004	126
YN-8	Xu et al., 2004	126
YN-9	Xu et al., 2004	126
YN-13	Xu et al., 2004	126
YN-14	Xu et al., 2004	132
YN-15	Xu et al., 2004	132
YN-19	Xu et al., 2004	132
YN-20	Xu et al., 2004	132
KT-01	Xu et al., 2004	129.9
KT-02	Xu et al., 2004	129.9
GJL-02	Xu et al., 2004	129.9
MYG-01	Xu et al., 2004	129.9
MYG-02	Xu et al., 2004	129.9
XML08-2	Xu et al., 2004	129.9
XML08-3	Xu et al., 2004	129.9
WHS08-1	Xu et al., 2004	129.9
EFS08-1	Xu et al., 2004	128
EFS08-2	Xu et al., 2004	128
EFS08-3	Xu et al., 2004	128
EFS08-4	Xu et al., 2004	128
EFS08-6	Xu et al., 2004	128
EFS08-7	Xu et al., 2004	128
N14	Jiang et al., 2007	139.5
N15	Jiang et al., 2007	139.5
N302	Jiang et al., 2007	139.5
N54	Jiang et al., 2007	139.5
LX119A1	Li et al., 2018	125
LX119A2	Li et al., 2018	125
LX119B1	Li et al., 2018	125
LX119B2	Li et al., 2018	125
LX119C1	Li et al., 2018	125
LX119C2	Li et al., 2018	125
LX119D1	Li et al., 2018	125
D18-B-Q1	Li et al., 2021	129
D18-B-Q2	Li et al., 2021	129
D18-B-Q3	Li et al., 2021	129
D18-B-Q4	Li et al., 2021	129
D18-M-Q1	Li et al., 2021	127
D18-M-Q2	Li et al., 2021	127
D18-M-Q3	Li et al., 2021	127
D18-M-Q4	Li et al., 2021	127
D18-N-Q1	Li et al., 2021	126
D18-N-Q2	Li et al., 2021	126
D18-N-Q3	Li et al., 2021	126
D18-N-Q4	Li et al., 2021	126
D18-P-Q1	Li et al., 2021	126
D18-P-Q2	Li et al., 2021	126
D18-P-Q3	Li et al., 2021	126
D18-P-Q4	Li et al., 2021	126
D18-Q-Q1	Li et al., 2021	124
D18-Q-Q2	Li et al., 2021	124
D18-Q-Q3	Li et al., 2021	124
SY-1	Zhang et al., 2019b	129
SY-2	Zhang et al., 2019b	129
SY-3	Zhang et al., 2019b	129
SY-4	Zhang et al., 2019b	129
SY-5	Zhang et al., 2019b	129
SY-6	Zhang et al., 2019b	129
SY-7	Zhang et al., 2019b	129
08LX12	Lan et al., 2012	184.7
08LX13	Lan et al., 2012	184.7
08LX14	Lan et al., 2012	184.7
08LX15	Lan et al., 2012	184.7
08LX16	Lan et al., 2012	184.7
08LX17	Lan et al., 2012	181.5
08LX18	Lan et al., 2012	181.5
08LX19	Lan et al., 2012	181.5
08LX28	Lan et al., 2012	181.5
08LX30	Lan et al., 2012	181.5
08LX32	Lan et al., 2012	181.5
08LX41	Lan et al., 2012	181.5
08LX44	Lan et al., 2012	181.5
08LX21	Lan et al., 2012	180.1
08LX37	Lan et al., 2012	180.1
08LX39	Lan et al., 2012	180.1
08LX22	Lan et al., 2012	180.1
08LX25	Lan et al., 2012	180.1
08LX36	Lan et al., 2012	180.1
08LX40	Lan et al., 2012	180.1
08LX27	Lan et al., 2012	180.1
08LX34	Lan et al., 2012	180.1
08LX35	Lan et al., 2012	180.1
08LX38	Lan et al., 2012	180.1
YSC-32/3	Yang et al., 2018	124.96
YSC-34/1	Yang et al., 2018	124.96
YSC-34/2	Yang et al., 2018	124.96
YSC-41/1	Yang et al., 2018	130.7
YSC-42/2	Yang et al., 2018	130.7
YSC-44/1	Yang et al., 2018	124.96
LY-34/1	Xue et al., 2019	130.6
LYN-1/4	Xue et al., 2019	130.6
LYN-1/5	Xue et al., 2019	130.6
JN1	Liu et al., 2020	121
JN2	Liu et al., 2020	121
JN3	Liu et al., 2020	121
JN4	Liu et al., 2020	121
JN5	Liu et al., 2020	121
JN6	Liu et al., 2020	121
JN7	Liu et al., 2020	121
JN8	Liu et al., 2020	121
LC1	Liu et al., 2020	123
LC3	Liu et al., 2020	123
LC4	Liu et al., 2020	123
LC5	Liu et al., 2020	123
LC7	Liu et al., 2020	123
LC8	Liu et al., 2020	123
DD1	Liu et al., 2020	123
DD2	Liu et al., 2020	127
DD3	Liu et al., 2020	127
DD4	Liu et al., 2020	127
DD5	Liu et al., 2020	127
DD6	Liu et al., 2020	127
DD7	Liu et al., 2020	127
DD8	Liu et al., 2020	127
DD9	Liu et al., 2020	127
LST1	Liu et al., 2020	119
LST4	Liu et al., 2020	119
LST5	Liu et al., 2020	119
LST6	Liu et al., 2020	119
LST7	Liu et al., 2020	119
LST8	Liu et al., 2020	119
LST9	Liu et al., 2020	119
HS1	Zhang et al., 2005	138.1
HS3	Zhang et al., 2005	138.1
HS4	Zhang et al., 2005	138.1
HS6	Zhang et al., 2005	138.1
HS8	Zhang et al., 2005	138.1
HS10	Zhang et al., 2005	138.1
HS13	Zhang et al., 2005	138.1
GLZ1	Zhang et al., 2005	185.4
GLZ2	Zhang et al., 2005	185.4
GLZ3	Zhang et al., 2005	185.4
GLZ4	Zhang et al., 2005	185.4
GLZ5	Zhang et al., 2005	185.4
GLZ6	Zhang et al., 2005	185.4
GLZ7	Zhang et al., 2005	185.4
LBS1	Zhang et al., 2005	129.3
LBS3	Zhang et al., 2005	129.3
LBS4	Zhang et al., 2005	129.3
LBS5	Zhang et al., 2005	129.3
LBS7	Zhang et al., 2005	129.3
LBS10	Zhang et al., 2005	129.3
LBS11	Zhang et al., 2005	129.3
LBS12	Zhang et al., 2005	129.3
LBS14	Zhang et al., 2005	129.3
LBS16	Zhang et al., 2005	129.3
15JSMG17	Zou et al., 2019	128.5
15SLZ049	Zou et al., 2019	128.5
15SLZ056	Zou et al., 2019	128.5
15SLZ060	Zou et al., 2019	128.5
15YJG16	Zou et al., 2019	128.5
15YJG18	Zou et al., 2019	128.5
15BG04	Zou et al., 2019	128.5
15BG05	Zou et al., 2019	128.5
15YJG06	Zou et al., 2019	128.5
15YJG08	Zou et al., 2019	128.5
15SLZ006	Zou et al., 2019	128.5
15SLZ023	Zou et al., 2019	128.5
15SLZ025	Zou et al., 2019	128.5
15SLZ029	Zou et al., 2019	128.5
15DLG08	Zou et al., 2019	128.5
15DLG24	Zou et al., 2019	128.5
15DLG26	Zou et al., 2019	128.5
15DLG29	Zou et al., 2019	128.5
15BG11	Zou et al., 2019	128.5
15LTG17	Zou et al., 2019	156.5
15LTG18	Zou et al., 2019	156.5
15LTG31	Zou et al., 2019	156.5
15LTG32	Zou et al., 2019	156.5
15BLG08	Zou et al., 2019	156.5
15BLG09	Zou et al., 2019	156.5
15BLG12	Zou et al., 2019	156.5
DT-05	Yuan et al., 2006	135
DT-06	Yuan et al., 2006	135
DT-09	Yuan et al., 2006	135
DT-11	Yuan et al., 2006	135
DT-12	Yuan et al., 2006	135
DT-15	Yuan et al., 2006	135
DT-16	Yuan et al., 2006	135
DT-17	Yuan et al., 2006	135
DT-19	Yuan et al., 2006	135
DT-24	Yuan et al., 2006	135
DT-25	Yuan et al., 2006	135
DT-26	Yuan et al., 2006	135
DT-28	Yuan et al., 2006	135
DT-31	Yuan et al., 2006	135
DT-32	Yuan et al., 2006	135
DT-33	Yuan et al., 2006	135
DT-34	Yuan et al., 2006	135
DT-35	Yuan et al., 2006	135
DT-36	Yuan et al., 2006	135
DT-37	Yuan et al., 2006	135
DT-38	Yuan et al., 2006	135
DT-39	Yuan et al., 2006	135
DT-40	Yuan et al., 2006	135
W-1	Zhao et al., 2012	130
W-2	Zhao et al., 2012	130
W-3	Zhao et al., 2012	130
W-4	Zhao et al., 2012	130.6
W-5	Zhao et al., 2012	130.6
W-6	Zhao et al., 2012	130.6
W-7	Zhao et al., 2012	130.6
N-1	Zhao et al., 2012	133.7
N-2	Zhao et al., 2012	133.7
N-3	Zhao et al., 2012	133.7
N-4	Zhao et al., 2012	133.7
N-5	Zhao et al., 2012	133.7
N-8	Zhao et al., 2012	133.7
N-9	Zhao et al., 2012	133.7
N-6	Zhao et al., 2012	132.9
N-7	Zhao et al., 2012	132.9
16XJ5-1	Zhang et al., 2019a	180
16XJ5-3	Zhang et al., 2019a	180
16XJ5-4	Zhang et al., 2019a	180
16XJ5-5	Zhang et al., 2019a	180
16XJ3-1	Zhang et al., 2019a	180
16XJ3-3	Zhang et al., 2019a	177
16XJ3-6	Zhang et al., 2019a	177
HYY-01	Duan et al., 2014	136
HYY-02	Duan et al., 2014	136
HYY-03	Duan et al., 2014	136
BBS-1-01	Duan et al., 2014	147
BBS-1-03	Duan et al., 2014	147
BBS-1-04	Duan et al., 2014	147
BBS-9-01	Duan et al., 2014	148
BBS-9-02	Duan et al., 2014	148
BBS-9-03	Duan et al., 2014	148
BBS-9-04	Duan et al., 2014	148
YJW-01	Duan et al., 2014	147
YJW-02	Duan et al., 2014	147
ML-01	Duan et al., 2014	146
ML-02	Duan et al., 2014	146
ML-03	Duan et al., 2014	146
ML-04	Duan et al., 2014	146
SYG-01	Duan et al., 2014	154
SYG-02	Duan et al., 2014	154
SYG-03	Duan et al., 2014	154
SYG-04	Duan et al., 2014	154
FW01-054	Wu et al., 2005	174
FW01-055	Wu et al., 2005	174
FW01-056	Wu et al., 2005	174
FW01-363	Wu et al., 2005	174
FW01-364	Wu et al., 2005	174
FW01-366	Wu et al., 2005	174
FW01-157	Wu et al., 2005	179
FW01-347	Wu et al., 2005	157
FW01-118	Wu et al., 2005	173
FW01-119	Wu et al., 2005	173
FW01-120	Wu et al., 2005	173
FW01-129	Wu et al., 2005	161
FW01-129R	Wu et al., 2005	161
FW01-156	Wu et al., 2005	164
FW01-158	Wu et al., 2005	179
FW01-407	Wu et al., 2005	165
FW01-408	Wu et al., 2005	165
FW01-414	Wu et al., 2005	165
FW01-416	Wu et al., 2005	165
FW01-417	Wu et al., 2005	165
FW01-417R	Wu et al., 2005	165
FW01-418	Wu et al., 2005	156
FW01-419	Wu et al., 2005	156
FW01-419R	Wu et al., 2005	156
FW01-146	Wu et al., 2005	156
FW01-147	Wu et al., 2005	156
FW01-148	Wu et al., 2005	156
FW01-149	Wu et al., 2005	156
FW01-150	Wu et al., 2005	156
LWA-1	Gao et al., 2012b	145.6
LWA-2	Gao et al., 2012b	145.6
LMT-1	Gao et al., 2012b	145.6
LMT-3	Gao et al., 2012b	145.6
LMT-8	Gao et al., 2012b	145.6
LMT-9	Gao et al., 2012b	145.6
LMT-4	Gao et al., 2012b	145.6
LWB-4	Gao et al., 2012b	145.6
LMT-6	Gao et al., 2012b	145.6
LMT-7	Gao et al., 2012b	145.6
LWB-2	Gao et al., 2012b	145.6
LWB-6	Gao et al., 2012b	145.6
GJG-01	Gao et al., 2012b	145.6
QJG-11	Gao et al., 2012b	145.6
QJG-12	Gao et al., 2012b	145.6
QJG-13	Gao et al., 2012b	145.6
QJG-14	Gao et al., 2012b	145.6
QJG-15	Gao et al., 2012b	145.6
QJG-16	Gao et al., 2012b	145.6
MSG-1	Gao et al., 2012b	145.6
dg102–2	Sun et al., 2017	162
dg102–4	Sun et al., 2017	162
qg2–4	Sun et al., 2017	162
t32-1	Sun et al., 2017	162
t32-2	Sun et al., 2017	122
t33-1	Sun et al., 2017	122
t33-2	Sun et al., 2017	122
t33-3	Sun et al., 2017	122
t33-4	Sun et al., 2017	122
t33-5	Sun et al., 2017	122
CS-1	Zhao et al., 2018	161
S-1	Zhao et al., 2018	130
S-2	Zhao et al., 2018	130
S-3	Zhao et al., 2018	130
X-5	Zhao et al., 2018	130
X-6	Zhao et al., 2018	130
X-8	Zhao et al., 2018	130
X-9	Zhao et al., 2018	130
X-10	Zhao et al., 2018	130
X-11	Zhao et al., 2018	130
15PL02	Li et al., 2019a	158
15PL12	Li et al., 2019a	158
15PL37	Li et al., 2019a	166
15PL38	Li et al., 2019a	166
15HLG21	Li et al., 2019a	130
15PL04	Li et al., 2019a	130
15PL06	Li et al., 2019a	130
15PL07	Li et al., 2019a	130
15PL22	Li et al., 2019a	130
15PL26	Li et al., 2019a	130
15PL36	Li et al., 2019a	130
15PL13	Li et al., 2019a	118
15PL31	Li et al., 2019a	118
15AS07	Li et al., 2019a	118
16PL01	Li et al., 2019a	118
16PL02	Li et al., 2019a	118
15AS01	Li et al., 2019a	118
15PL08	Li et al., 2019a	118
15PL29	Li et al., 2019a	118
15PL30	Li et al., 2019a	118
15PL32	Li et al., 2019a	115
15PL33	Li et al., 2019a	115
15PL34	Li et al., 2019a	115
16PL04	Li et al., 2019a	115
16PL05	Li et al., 2019a	115
15PL20	Li et al., 2019a	115
15PL21	Li et al., 2019a	115
15PL27	Li et al., 2019a	115
16PL19	Li et al., 2019a	115
16PL20	Li et al., 2019a	115
15PL09	Li et al., 2019a	115
11XC10	Wang et al., 2017	125
11XC11	Wang et al., 2017	125
11XC12	Wang et al., 2017	125
12XTM03	Wang et al., 2017	125
12XTM04	Wang et al., 2017	125
12XTM05	Wang et al., 2017	125
12XTM06	Wang et al., 2017	125
12XTM07	Wang et al., 2017	125
12XTM08	Wang et al., 2017	125
12XTM09	Wang et al., 2017	125
12XTM10	Wang et al., 2017	125
12XTM12	Wang et al., 2017	125
07FS02	Sun et al., 2010	131.5
07FS09	Sun et al., 2010	131.5
07FS11	Sun et al., 2010	131.5
08FS02	Sun et al., 2010	131.5
08FS10	Sun et al., 2010	131.5
18JF13	Feng et al., 2020	126.5
18JF14	Feng et al., 2020	126.5
18JF21	Feng et al., 2020	126.5
18JF24	Feng et al., 2020	126.5
18JF25	Feng et al., 2020	126.5
18JF10	Feng et al., 2020	126.5
18JF11	Feng et al., 2020	126.5
18JF44	Feng et al., 2020	126.5
18JF45	Feng et al., 2020	126.5
GHG16	Wang et al., 2006	125.8
GHG15	Wang et al., 2006	125.8
GHG03	Wang et al., 2006	125.8
GHG05	Wang et al., 2006	125.8
GHG14	Wang et al., 2006	125.8
GHG13	Wang et al., 2006	125.8
GHG06	Wang et al., 2006	125.8
14QX07	Li et al., 2019b	129
14QX23	Li et al., 2019b	129
14QX24	Li et al., 2019b	129
14QX26	Li et al., 2019b	129
14QX27	Li et al., 2019b	129
14QX32	Li et al., 2019b	129
14QX13	Li et al., 2019b	119.5
14QX15	Li et al., 2019b	119.5
14QX19	Li et al., 2019b	119.5
14QX28	Li et al., 2019b	119.5
14QX30	Li et al., 2019b	119.5
14QX36	Li et al., 2019b	119.5
YT-01	Yang et al., 2020	148.7
YT-02	Yang et al., 2020	148.7
YT-03	Yang et al., 2020	148.7
YT-04	Yang et al., 2020	148.7
DZC-65	Yang et al., 2020	148.7
GJC-26	Yang et al., 2020	152.5
GJC-27	Yang et al., 2020	152.5
GJC-28	Yang et al., 2020	152.5
GJC-29	Yang et al., 2020	152.5
LYG-33	Yang et al., 2020	149
LYG-34	Yang et al., 2020	149
JD-21	Yang et al., 2020	149
JD-22	Yang et al., 2020	149
JD-23	Yang et al., 2020	149
JD-24	Yang et al., 2020	149
JD-25	Yang et al., 2020	149
JD-26	Yang et al., 2020	149
JD-27	Yang et al., 2020	149
JD-28	Yang et al., 2020	149
JD-29	Yang et al., 2020	149
JD-30	Yang et al., 2020	149
JYG-01	Yang et al., 2020	149
JYG-02	Yang et al., 2020	149
JYG-03	Yang et al., 2020	149
FW01-350	Yang et al., 2004	127
FW01-38	Yang et al., 2004	127
FW01-18	Yang et al., 2004	127
FW01-353	Yang et al., 2004	124
FW01-21	Yang et al., 2004	124
FW01-12	Yang et al., 2004	124
JH-37	Yang et al., 2004	120
JH-38	Yang et al., 2004	120
JH-39	Yang et al., 2004	120
JH-43-2	Yang et al., 2004	120
JH-45	Yang et al., 2004	120
FW01-22	Yang et al., 2004	120
FW01-25	Yang et al., 2004	120
FW01-26	Yang et al., 2004	120
RZL10-1	Tang et al., 2014	114.9
RZL10-2	Tang et al., 2014	114.9
RZL10-3	Tang et al., 2014	114.9
RZL10-4	Tang et al., 2014	114.9
RZL10-5	Tang et al., 2014	114.9
RZL10-6	Tang et al., 2014	118
WTA10-1	Tang et al., 2014	118
TBD10-1	Tang et al., 2014	118
TBD10-2	Tang et al., 2014	118
TBD10-3	Tang et al., 2014	118
11JF09	Sun et al., 2021	162
11JF10	Sun et al., 2021	162
11JF15	Sun et al., 2021	162
11JF16	Sun et al., 2021	162
08JF01	Sun et al., 2021	162
15DL29-1	Teng et al., 2020	175
15DL29-2	Teng et al., 2020	175
FW01-055*	Teng et al., 2020	175
FW01-056*	Teng et al., 2020	175
FW01-363*	Teng et al., 2020	175
FW01-364*	Teng et al., 2020	175
15DL01-1	Teng et al., 2020	167
15DL10-3	Teng et al., 2020	167
15DL19-1	Teng et al., 2020	167
15DL21-2	Teng et al., 2020	167
15DL29-3	Teng et al., 2020	167
15DA04-1	Teng et al., 2020	123
15DA29-1	Teng et al., 2020	123
15DA33-1	Teng et al., 2020	123
15DA37-1	Teng et al., 2020	123
15DA44-2	Teng et al., 2020	123
15DA45-1	Teng et al., 2020	123
FW01-353*	Teng et al., 2020	123
FW01-21*	Teng et al., 2020	123
FW01-12*	Teng et al., 2020	123
FW01-356*	Teng et al., 2020	123
SK11-4*	Teng et al., 2020	123
15DA03-1	Teng et al., 2020	123
15DA30-1	Teng et al., 2020	123
15DA31-1	Teng et al., 2020	123
15DA36-1	Teng et al., 2020	123
15DA39-1	Teng et al., 2020	123
15DA41-1	Teng et al., 2020	123
15DA43-1	Teng et al., 2020	123
JH-37*	Teng et al., 2020	123
JH-38*	Teng et al., 2020	123
JH-39*	Teng et al., 2020	123
JH-43–2*	Teng et al., 2020	123
JH-45*	Teng et al., 2020	123
JHS-1	Li et al., 2020	115
JHS-2	Li et al., 2020	115
JHS-3	Li et al., 2020	115
HG-1	Li et al., 2020	115
HG-2	Li et al., 2020	115
CS-1	Li et al., 2020	109
CS-2	Li et al., 2020	109
ZS-1	Li et al., 2020	109
ZS-2	Li et al., 2020	109
ZS-3	Li et al., 2020	109
ZS-4	Li et al., 2020	114
DLS3-1	Li et al., 2020	114
DLS3-2	Li et al., 2020	114
DLS3-3	Li et al., 2020	114
DLS1-1	Li et al., 2020	114
DLS1-2	Li et al., 2020	114
DLS1-3	Li et al., 2020	114
DLS2-1	Li et al., 2020	114
DLS2-2	Li et al., 2020	114
DLS4-1	Li et al., 2020	114
DLS4-2	Li et al., 2020	114
DLS4-3	Li et al., 2020	114
DLS4-4	Li et al., 2020	114
DLS4-5	Li et al., 2020	114
DGS-1	Li et al., 2020	114
JS1-1	Li et al., 2020	114
JS1-2	Li et al., 2020	114
JS306-1	Li et al., 2020	114
JS306-2	Li et al., 2020	117
JS301-1	Li et al., 2020	117
JS301-2	Li et al., 2020	117
JS301-3	Li et al., 2020	117
LKXDJ-1-1	Liu et al., 2018b	127
LKXDJ-1-2	Liu et al., 2018b	127
LZYD-1-11	Liu et al., 2018b	120
LZYD-1-12	Liu et al., 2018b	120
PDDZ-2-1	Liu et al., 2018b	122
PDDZ-2-2	Liu et al., 2018b	122
SJS-7	Yang et al., 2005	125
SJS-8	Yang et al., 2005	125
SJS-11	Yang et al., 2005	125
FZ-5	Yang et al., 2005	122
FZ-6	Yang et al., 2005	122
FZ-8-2	Yang et al., 2005	122
FZ-10-2	Yang et al., 2005	122
FZ-11	Yang et al., 2005	122
aTH1–4	Zhou et al., 2021	132
16PJ10–5	Zhou et al., 2021	132
17PJ1–2	Zhou et al., 2021	132
17PJ2–7	Zhou et al., 2021	132
17PJ2–8	Zhou et al., 2021	132
aTH8–36	Zhou et al., 2021	130
aTH9–2	Zhou et al., 2021	130
16PJ2–2	Zhou et al., 2021	130
16PJ2–8	Zhou et al., 2021	130
16PJ1–7	Zhou et al., 2021	130
aTH8–4	Zhou et al., 2021	130
aTH8–25	Zhou et al., 2021	130
16PJ19–2	Zhou et al., 2021	129
17PJ10–4	Zhou et al., 2021	129
17PJ10–6	Zhou et al., 2021	129
17PJ13–1	Zhou et al., 2021	129
17PJ13–4	Zhou et al., 2021	129
16PJ24–10	Zhou et al., 2021	129
16PJ24–12	Zhou et al., 2021	129
16PJ24–14	Zhou et al., 2021	129
16PJ24–18	Zhou et al., 2021	129
16PJ25–8	Zhou et al., 2021	129
17PJ15–1	Zhou et al., 2021	129
17PJ17–2	Zhou et al., 2021	129
16PJ22–1	Zhou et al., 2021	130
16PJ22–2	Zhou et al., 2021	130
16PJ28–4	Zhou et al., 2021	130
16PJ28–9	Zhou et al., 2021	130
16PJ30–1	Zhou et al., 2021	130
16PJ31–2	Zhou et al., 2021	130
16PJ32–3	Zhou et al., 2021	130
16PJ32–5	Zhou et al., 2021	130
16PJ32–8	Zhou et al., 2021	130
16PJ32–9	Zhou et al., 2021	130
16PJ32–15	Zhou et al., 2021	130
17PJ19–4	Zhou et al., 2021	130
ZX-1	Liu et al., 2018a	180
ZX-2	Liu et al., 2018a	180
ZX-3	Liu et al., 2018a	180
ZX-4	Liu et al., 2018a	180
ZX-5	Liu et al., 2018a	180
SL-1	Liu et al., 2018a	176
SL-2	Liu et al., 2018a	176
SL-3	Liu et al., 2018a	176
SL-4	Liu et al., 2018a	176
LJT-1	Liu et al., 2018a	173
LJT-2	Liu et al., 2018a	173
LJT-3	Liu et al., 2018a	173
LJT-4	Liu et al., 2018a	173
CZS-1	Liu et al., 2018a	169
CZS-2	Liu et al., 2018a	169
CZS-3	Liu et al., 2018a	169
CZS-4	Liu et al., 2018a	169
CZS-5	Liu et al., 2018a	169
YC-1	Liu et al., 2018a	156
YC-2	Liu et al., 2018a	156
YC-3	Liu et al., 2018a	156
YC-4	Liu et al., 2018a	156
LJ22-1	Pei et al., 2011	126
LJ23-1	Pei et al., 2011	126
LJ23-2	Pei et al., 2011	126
BS1-1	Pei et al., 2011	130
BS3-1	Pei et al., 2011	130
BS3-5	Pei et al., 2011	130
JA28-1	Pei et al., 2011	127
JA28-2	Pei et al., 2011	127
JA28-3	Pei et al., 2011	127
JA10-1	Pei et al., 2011	123
JA11-1	Pei et al., 2011	123
JA13-1	Pei et al., 2011	123
JA6-1	Pei et al., 2011	123
JA3-1	Pei et al., 2011	123
JA3-2	Pei et al., 2011	123
JA8-1	Pei et al., 2011	123
JA26-1	Pei et al., 2011	122
JA16-1	Pei et al., 2011	123
JA17-1	Pei et al., 2011	123
JA17-2	Pei et al., 2011	123
JA20-1	Pei et al., 2011	123
JA22-1	Pei et al., 2011	123
JA24-1	Pei et al., 2011	123
FS08-1	Xu et al., 2012	136
FS08-3	Xu et al., 2012	136
FS08-5	Xu et al., 2012	136
FS08-7	Xu et al., 2012	136
FS08-9	Xu et al., 2012	136
FS08-13	Xu et al., 2012	136
FS08-14	Xu et al., 2012	136
FS08-17	Xu et al., 2012	136
FS08-15	Xu et al., 2012	136
DZZ-1	Xiaolu et al., 2011	140
DZZ-2	Xiaolu et al., 2011	140
DZZ-3	Xiaolu et al., 2011	140
DZZ-4	Xiaolu et al., 2011	140
DZZ-5	Xiaolu et al., 2011	140
DZZ-6	Xiaolu et al., 2011	140
BC-1	Xiaolu et al., 2011	140
BC-2	Xiaolu et al., 2011	140
BC-3	Xiaolu et al., 2011	140
BC-4	Xiaolu et al., 2011	140
BC-5	Xiaolu et al., 2011	140
BC-6	Xiaolu et al., 2011	140
FN-37	Gao et al., 2014	131
FN-43	Gao et al., 2014	131
FN-46	Gao et al., 2014	131
FN-49	Gao et al., 2014	131
FN-54	Gao et al., 2014	131
FN-56	Gao et al., 2014	131
FN-63	Gao et al., 2014	115
FN-67	Gao et al., 2014	115
FN-77	Gao et al., 2014	115
FN-89	Gao et al., 2014	117
FN-95	Gao et al., 2014	117
FN-101	Gao et al., 2014	117
FN-102	Gao et al., 2014	117
FN-103	Gao et al., 2014	117
FN-109	Gao et al., 2014	117
FN-112	Gao et al., 2014	117
FN-120	Gao et al., 2014	120
FN-124	Gao et al., 2014	120
FN-125	Gao et al., 2014	120
FN-126	Gao et al., 2014	115
FN-127	Gao et al., 2014	115
FN-128	Gao et al., 2014	115
FN-129	Gao et al., 2014	115
FN-136	Gao et al., 2014	115
FN-137	Gao et al., 2014	115
FN-143	Gao et al., 2014	115
FN-153	Gao et al., 2014	115
FN-156	Gao et al., 2014	115
FN-160	Gao et al., 2014	115
FN-161	Gao et al., 2014	115
FN-163	Gao et al., 2014	115
FN-165	Gao et al., 2014	115
FN-183	Gao et al., 2014	115
JN09108	Fan et al., 2017	173.5
QL07	Fan et al., 2017	173.5
QL08	Fan et al., 2017	173.5
QL09	Fan et al., 2017	173.5
JN09101	Fan et al., 2017	167
JN09102	Fan et al., 2017	167
QL03	Fan et al., 2017	167
JN09118	Fan et al., 2017	170.5
QL29	Fan et al., 2017	170.5
QL30	Fan et al., 2017	170.5
QL33	Fan et al., 2017	170.5
QL39	Fan et al., 2017	170.5
QL38	Fan et al., 2017	170.5
JN09115	Fan et al., 2017	170.5
CNK-1	Li et al., 2015	128.2
CNK-2	Li et al., 2015	128.2
CNK-3	Li et al., 2015	128.2
FJG-1	Li et al., 2015	128.2
FJG-2	Li et al., 2015	128.2
FJG-3	Li et al., 2015	128.2
FJG-4	Li et al., 2015	128.2
MP-1	Li et al., 2015	128.2
TPK-1	Li et al., 2015	128.2
ZJG-1	Li et al., 2015	128.2
ZT-1	Li et al., 2015	128.2
ZT-2	Li et al., 2015	128.2
ZT-4	Li et al., 2015	128.2
ZT-5	Li et al., 2015	128.2
ZTX-1	Li et al., 2015	128.2
ZTX-2	Li et al., 2015	128.2
ZTX-3	Li et al., 2015	128.2
ZTX-4	Li et al., 2015	128.2
ZTX-6	Li et al., 2015	128.2
ZTX-7	Li et al., 2015	128.2
08G01	Yang et al., 2012	158
08G02	Yang et al., 2012	158
08G03	Yang et al., 2012	158
08G04	Yang et al., 2012	158
08G05	Yang et al., 2012	158
08G19	Yang et al., 2012	158
08G20	Yang et al., 2012	158
08G40	Yang et al., 2012	158
08G42	Yang et al., 2012	158
08G50	Yang et al., 2012	158
08G52	Yang et al., 2012	158
08G53	Yang et al., 2012	158
08G15	Yang et al., 2012	159
08G16	Yang et al., 2012	159
08G17	Yang et al., 2012	159
08G18	Yang et al., 2012	159
08G21	Yang et al., 2012	159
08G22	Yang et al., 2012	159
08G24	Yang et al., 2012	159
08G33	Yang et al., 2012	159
08G38	Yang et al., 2012	159
08G39	Yang et al., 2012	159
08G49	Yang et al., 2012	159
08G59	Yang et al., 2012	159
08G07	Yang et al., 2012	129
08G08	Yang et al., 2012	129
08G13	Yang et al., 2012	129
08G25	Yang et al., 2012	129
08G26	Yang et al., 2012	129
08G28	Yang et al., 2012	129
08G29	Yang et al., 2012	129
08G30	Yang et al., 2012	129
08G31	Yang et al., 2012	129
08G32	Yang et al., 2012	129
08G37	Yang et al., 2012	129
08G61	Yang et al., 2012	129
08-GJL-02	Gu et al., 2013	130
08-LL2-01	Gu et al., 2013	141
08-LL-01	Gu et al., 2013	141
08-LL-02	Gu et al., 2013	141
08HY3-01	Gu et al., 2013	141
08-HY2-01	Gu et al., 2013	141
08-HY3-02	Gu et al., 2013	141
08-GC-01B	Gu et al., 2013	141
08-YP2-05	Gu et al., 2013	141
08-YP3-01	Gu et al., 2013	141
07-HT-01	Gu et al., 2013	132
07-LW-04	Gu et al., 2013	134
07-YT-01	Gu et al., 2013	132
07-YT-03	Gu et al., 2013	132
07-ZZYN-01	Gu et al., 2013	132
08-GS-01	Gu et al., 2013	153
07-RZ-02	Gu et al., 2013	122.5
07-RZ-03	Gu et al., 2013	122.5
07-RZ-01	Gu et al., 2013	122.5
07-MS-03	Gu et al., 2013	122.5
07-MS-01	Gu et al., 2013	122.5
08-SY-01	Gu et al., 2013	122.5
08-SY-02	Gu et al., 2013	122.5
08-SY-03	Gu et al., 2013	122.5
08-SY-04B	Gu et al., 2013	122.5
08-SY-06	Gu et al., 2013	122.5
08-SB-01B	Gu et al., 2013	122.5
08-WL-01	Gu et al., 2013	122.5
08-ZZ-01D	Gu et al., 2013	122.5
08-ZZ-02	Gu et al., 2013	122.5
07-QS-02	Gu et al., 2013	122.5
07-ZK-01	Gu et al., 2013	122.5
08-XJD-01	Gu et al., 2013	122.5
08-XJD0-2	Gu et al., 2013	122.5
08-QBS-03	Gu et al., 2013	122.5
08-QBS-04	Gu et al., 2013	122.5
08-HJSH-05	Gu et al., 2013	122.5
08-HJSH-06	Gu et al., 2013	122.5
08-DC-01	Gu et al., 2013	122.5
08-LS-01A	Gu et al., 2013	122.5
08-HB-01	Gu et al., 2013	122.5
08-HB-04	Gu et al., 2013	122.5
07-QSGY-01	Gu et al., 2013	122.5
07-QSGY-02	Gu et al., 2013	122.5
08-YJZ-03	Gu et al., 2013	122.5
08-LHP-01A	Gu et al., 2013	132
08-FM-03	Gu et al., 2013	132
08-FM-04	Gu et al., 2013	132
08-BS-03	Gu et al., 2013	132
08-BS-04	Gu et al., 2013	132
13H17-1	Yang et al., 2016	130
13H17-2	Yang et al., 2016	130
13H17-3	Yang et al., 2016	130
13H17-4	Yang et al., 2016	130
SMX5-1	Yang et al., 2016	128
SMX5-2	Yang et al., 2016	128
SMX5-3	Yang et al., 2016	128
SMX5-4	Yang et al., 2016	128
WM1-1	Yang et al., 2016	130
WM1-2	Yang et al., 2016	130
WM1-6	Yang et al., 2016	130
X-14-1	Yang et al., 2016	130
SMX4-1	Yang et al., 2016	129
SMX4-2	Yang et al., 2016	129
SMX4-8	Yang et al., 2016	129
CF1-1	Yang et al., 2016	130
CF1-2	Yang et al., 2016	130
CF1-5	Yang et al., 2016	130
X-16-1	Yang et al., 2016	130
SD-11	Goss et al., 2010	118
SD-12	Goss et al., 2010	118
SD-13	Goss et al., 2010	118
SD-14	Goss et al., 2010	118
SD-17	Goss et al., 2010	118
SD-27	Goss et al., 2010	125
SD-28	Goss et al., 2010	116
SD-29	Goss et al., 2010	116
SD-30	Goss et al., 2010	116
SD-31	Goss et al., 2010	116
SD-56	Goss et al., 2010	115
SD-59	Goss et al., 2010	115
SD-63	Goss et al., 2010	115
HY-01	Li et al., 2014	116.8
HY-02	Li et al., 2014	116.8
HY-03	Li et al., 2014	116.8
HY-04	Li et al., 2014	116.8
HY-05	Li et al., 2014	116.8
HY-06	Li et al., 2014	116.8
HY-07	Li et al., 2014	116.8
HY-08	Li et al., 2014	116.8
HY-09	Li et al., 2014	116.8
HY-10	Li et al., 2014	116.8
HY-11	Li et al., 2014	116.8
HY-12	Li et al., 2014	116.8
HY-13	Li et al., 2014	116.8
HY-14	Li et al., 2014	116.8
HY-15	Li et al., 2014	116.8
HY-16	Li et al., 2014	116.8
HY-17	Li et al., 2014	116.8
HY-18	Li et al., 2014	116.8
HY-19	Li et al., 2014	116.8
HY-20	Li et al., 2014	116.8
HY-21	Li et al., 2014	116.8
HY-22	Li et al., 2014	116.8
HY-23	Li et al., 2014	116.8
HYC-12	Yang et al., 2019	132
HYC-13	Yang et al., 2019	132
HYC-15	Yang et al., 2019	132
HYC-16	Yang et al., 2019	132
WJH-01	He et al., 2018	132
YY-02	He et al., 2018	132
WJH-03	He et al., 2018	132
YY-01	He et al., 2018	132
YY-31	He et al., 2018	132
YY-32	He et al., 2018	132
YY-34	He et al., 2018	132
YY-40	He et al., 2018	132
YY-45	He et al., 2018	132
YY-48	He et al., 2018	132
YY-49	He et al., 2018	132
YY-52	He et al., 2018	132
YY-61	He et al., 2018	132
YY-22	He et al., 2018	132
YY-56	He et al., 2018	132
JT60	Ding et al., 2019	117
JT62	Ding et al., 2019	117
JT58	Ding et al., 2019	117
JT59	Ding et al., 2019	117
JT63	Ding et al., 2019	117
JT78	Ding et al., 2019	117
JT77	Ding et al., 2019	117
JT83	Ding et al., 2019	117
JT92	Ding et al., 2019	117
JT98	Ding et al., 2019	117
JT88	Ding et al., 2019	117
JT97	Ding et al., 2019	117
1867121	Tao et al., 2006	132.1
1875159	Tao et al., 2006	132.1
1874799	Tao et al., 2006	132.1
1870925	Tao et al., 2006	132.1
1901666	Tao et al., 2006	132.1
WB-11	Tao et al., 2006	132.1
WB-12	Tao et al., 2006	132.1
WB-21	Tao et al., 2006	132.1
021B	Nie et al., 2015	128
101B	Nie et al., 2015	128
181B	Nie et al., 2015	128
241B	Nie et al., 2015	128
201B	Nie et al., 2015	128
221B	Nie et al., 2015	128
262B	Nie et al., 2015	128
061B	Nie et al., 2015	128
063B	Nie et al., 2015	128
031B	Nie et al., 2015	128
062B	Nie et al., 2015	128
141B	Nie et al., 2015	128
011B	Nie et al., 2015	128
021B	Nie et al., 2015	150
031B	Nie et al., 2015	150
041B	Nie et al., 2015	150
051B	Nie et al., 2015	150
061B	Nie et al., 2015	150
071B	Nie et al., 2015	150
082B	Nie et al., 2015	150
LN-02	Qiuju et al., 2012	152
LN-05	Qiuju et al., 2012	152
LN-15B2	Qiuju et al., 2012	152
LN-09	Qiuju et al., 2012	152
STTW1	CUI et al., 2020	156
STTW2	CUI et al., 2020	156
STWH1017	CUI et al., 2020	139
WH1019	CUI et al., 2020	139
WH1021	CUI et al., 2020	139
STWH1077	CUI et al., 2020	130
STTW16	CUI et al., 2020	125
HS-01	Bo et al., 2020	120.1
HS-04	Bo et al., 2020	120.1
JY-01	Bo et al., 2020	120.1
JY-13	Bo et al., 2020	120.1
JY-14	Bo et al., 2020	120.1
WY-01	Gao et al., 2012a	135
WY-08	Gao et al., 2012a	135
WY-09	Gao et al., 2012a	135
WY-11	Gao et al., 2012a	135
WY-13	Gao et al., 2012a	135
WY-14	Gao et al., 2012a	135
WY-21	Gao et al., 2012a	135
WY-22	Gao et al., 2012a	135
WY-23	Gao et al., 2012a	135
WY-24	Gao et al., 2012a	135
WY-19	Gao et al., 2012a	135
WY-20	Gao et al., 2012a	135
WY-02	Gao et al., 2012a	135
WY-03	Gao et al., 2012a	135
WY-04	Gao et al., 2012a	135
WY-05	Gao et al., 2012a	135
WY-06	Gao et al., 2012a	135
WY-07	Gao et al., 2012a	135
NN-01	Gao et al., 2012a	139
NN-02	Gao et al., 2012a	139
NN-03	Gao et al., 2012a	139
NN-04	Gao et al., 2012a	139
NN-05	Gao et al., 2012a	139
NN-07	Gao et al., 2012a	139
NN-08	Gao et al., 2012a	139
NN-09	Gao et al., 2012a	139
NN-10	Gao et al., 2012a	139
NN-11	Gao et al., 2012a	139
NN-13	Gao et al., 2012a	139
NN-14	Gao et al., 2012a	139
NN-17	Gao et al., 2012a	139
NN-18	Gao et al., 2012a	139
NN-19	Gao et al., 2012a	139
NN-20	Gao et al., 2012a	139
NN-21	Gao et al., 2012a	139
HY-22	Gao et al., 2010	135.4
HY-34	Gao et al., 2010	135.4
HY-38	Gao et al., 2010	135.4
HY-39	Gao et al., 2010	135.4
HY-40	Gao et al., 2010	135.4
HY-59	Gao et al., 2010	135.4
HY-60	Gao et al., 2010	135.4
HY-10	Gao et al., 2010	148.2
HY-14	Gao et al., 2010	148.2
HY-16	Gao et al., 2010	148.2
HY-19	Gao et al., 2010	148.2
HY-33	Gao et al., 2010	148.2
HY-41	Gao et al., 2010	148.2
HY-43	Gao et al., 2010	148.2
HY-44	Gao et al., 2010	148.2
HY-24	Gao et al., 2010	148.2
HY-28	Gao et al., 2010	148.2
HY-31	Gao et al., 2010	148.2
HY-42	Gao et al., 2010	148.2
HY-45	Gao et al., 2010	141.4
HY-57	Gao et al., 2010	141.4
HY-48	Gao et al., 2010	135.3
HY-50	Gao et al., 2010	135.3
HY-51	Gao et al., 2010	135.3
HY-52	Gao et al., 2010	135.3
HY-53	Gao et al., 2010	135.3
QLT1	Xiaoxia et al., 2011	133
QLT2	Xiaoxia et al., 2011	133
QLT3	Xiaoxia et al., 2011	133
QLT6	Xiaoxia et al., 2011	133
QLT9	Xiaoxia et al., 2011	133
QLT10-1	Xiaoxia et al., 2011	133
QLT11	Xiaoxia et al., 2011	133
QLT13	Xiaoxia et al., 2011	133

## Sheet: Mafic magma references
REFERENCES
Cai, Y.-C., Fan, H.-R., Santosh, M., Hu, F.-F., Yang, K.-F., and Hu, Z., 2015, Subduction-related metasomatism of the lithospheric mantle beneath the southeastern North China Craton: Evidence from mafic to intermediate dykes in the northern Sulu orogen: Tectonophysics, v. 659, p. 137-151.
Cai, Y.-C., Fan, H.-R., Santosh, M., Liu, X., Hu, F.-F., Yang, K.-F., Lan, T.-G., Yang, Y.-H., and Liu, Y., 2013, Evolution of the lithospheric mantle beneath the southeastern North China Craton: Constraints from mafic dikes in the Jiaobei terrain: Gondwana Research, v. 24, no. 2, p. 601-621.
Chen, L.-H., Zeng, G., Jiang, S.-Y., Hofmann, A. W., Xu, X.-S., and Pan, M.-B., 2009, Sources of Anfengshan basalts: Subducted lower crust in the Sulu UHP belt, China: Earth and Planetary Science Letters, v. 286, no. 3-4, p. 426-435.
Choi, H.-O., Choi, S. H., Lee, Y. S., Ryu, J.-S., Lee, D.-C., Lee, S.-G., Sohn, Y. K., and Liu, J.-q., 2020, Petrogenesis and mantle source characteristics of the late Cenozoic Baekdusan (Changbaishan) basalts, North China Craton: Gondwana Research, v. 78, p. 156-171.
Chung, S.-L., 1999, Trace element and isotope characteristics of Cenozoic basalts around the Tanlu fault with implications for the eastern plate boundary between North and South China: The Journal of Geology, v. 107, no. 3, p. 301-312.
Dai, L.-Q., Zheng, Y.-F., and Zhao, Z.-F., 2016, Termination time of peak decratonization in North China: Geochemical evidence from mafic igneous rocks: Lithos, v. 240-243, p. 327-336.
Dostal, J., Zhi, X., Muehlenbachs, K., Dupuy, C., and Zhai, M., 1991, Geochemistry of Cenozoic alkali basaltic lavas from Shandong Province, eastern China: Geochemical Journal, v. 25, no. 1, p. 1-16.
Feng, Y., Yang, J., Sun, J., and Zhang, J., 2020, Material records for Mesozoic destruction of the North China Craton by subduction of the Paleo-Pacific slab: Science China Earth Sciences, v. 63, no. 5, p. 690-700.
Gao, S., Rudnick, R. L., Xu, W.-L., Yuan, H.-L., Liu, Y.-S., Walker, R. J., Puchtel, I. S., Liu, X., Huang, H., Wang, X.-R., and Yang, J., 2008, Recycling deep cratonic lithosphere and generation of intraplate magmatism in the North China Craton: Earth and Planetary Science Letters, v. 270, no. 1-2, p. 41-53.
Guo, F., Fan, W.-M., Wang, Y.-J., and Lin, G., 2001, Late Mesozoic mafic intrusive complexes in North China Block: constraints on the nature of subcontinental lithospheric mantle: Physics and Chemistry of the Earth, Part A: Solid Earth and Geodesy, v. 26, no. 9-10, p. 759-771.
Guo, F., Fan, W., Wang, Y., and Li, C., 2005, Petrogenesis and tectonic implications of Early Cretaceous high‐K calc‐alkaline volcanic rocks in the Laiyang Basin of the Sulu Belt, eastern China: Island Arc, v. 14, no. 2, p. 69-90.
Guo, F., Fan, W., Wang, Y., and Zhang, M., 2004, Origin of early Cretaceous calc-alkaline lamprophyres from the Sulu orogen in eastern China: implications for enrichment processes beneath continental collisional belt: Lithos, v. 78, no. 3, p. 291-305.
Guo, F., Fan, W. M., Li, X. Y., and Li, C. W., 2022, Geochemistry of Mesozoic mafic volcanic rocks from the Yanshan belt in the northern margin of the North China Block: relations with post-collisional lithospheric extension: Geological Society, London, Special Publications, v. 280, no. 1, p. 101-129.
Guo, J., Guo, F., Yan Wang, C., and Li, C., 2013, Crustal recycling processes in generating the early Cretaceous Fangcheng basalts, North China Craton: New constraints from mineral chemistry, oxygen isotopes of olivine and whole-rock geochemistry: Lithos, v. 170-171, p. 1-16.
Guo, P., Niu, Y., Sun, P., Wang, X., Gong, H., Duan, M., Zhang, Y., Kong, J., Tian, L., and Wu, S., 2018, The Early Cretaceous bimodal volcanic suite from the Yinshan Block, western North China Craton: Origin, process and geological significance: Journal of Asian Earth Sciences, v. 160, p. 348-364.
Guo, P., Niu, Y., Sun, P., Ye, L., Liu, J., Zhang, Y., Feng, Y.-x., and Zhao, J.-x., 2016, The origin of Cenozoic basalts from central Inner Mongolia, East China: The consequence of recent mantle metasomatism genetically associated with seismically observed paleo-Pacific slab in the mantle transition zone: Lithos, v. 240-243, p. 104-118.
Guo, P., Niu, Y., Ye, L., Liu, J., Sun, P., Cui, H., Zhang, Y., Gao, J., Su, L., Zhao, J., and Feng, Y., 2014, Lithosphere thinning beneath west North China Craton: Evidence from geochemical and Sr–Nd–Hf isotope compositions of Jining basalts: Lithos, v. 202-203, p. 37-54.
Ho, K.-S., Liu, Y., Chen, J.-C., You, C.-F., and Yang, H.-J., 2011, Geochemical Characteristics of Cenozoic Jining Basalts of the Western North China Craton: Evidence for the Role of the Lower Crust, Lithosphere, and Asthenosphere in Petrogenesis: Terrestrial, Atmospheric and Oceanic Sciences, v. 22, no. 1.
Hu, F., Fan, H., Yang, J., Zhai, M., Xie, L., Yang, Y., and Liu, X., 2007, Petrogenesis of Gongjia gabbro-diorite in the Kunyushan area, Jiaodong Peninsula: Constraints from petro-geochemistry, zircon U-Pb dating and Hf isotopes: Acta Petrologica Sinica, v. 23, no. 2, p. 369-380.
Huang, X.-L., Zhong, J.-W., and Xu, Y.-G., 2012, Two tales of the continental lithospheric mantle prior to the destruction of the North China Craton: Insights from Early Cretaceous mafic intrusions in western Shandong, East China: Geochimica et Cosmochimica Acta, v. 96, p. 193-214.
Jahn, B.-m., Wu, F., Lo, C.-H., and Tsai, C.-H., 1999, Crust–mantle interaction induced by deep subduction of the continental crust: geochemical and Sr–Nd isotopic evidence from post-collisional mafic–ultramafic intrusions of the northern Dabie complex, central China: Chemical geology, v. 157, no. 1-2, p. 119-146.
Jiang, Y.-H., Jiang, S.-Y., Ling, H.-F., and Ni, P., 2010, Petrogenesis and tectonic implications of Late Jurassic shoshonitic lamprophyre dikes from the Liaodong Peninsula, NE China: Mineralogy and Petrology, v. 100, no. 3-4, p. 127-151.
Kuang, Y.-s., Pang, C., Hong, L., Zhong, Y., and Xu, Y., 2012a, Geochronology and geochemistry of the Late Cretaceous basalts in the Jiaolai Basin: constraints on lithospheric thinning and accretion beneath North China Craton: Geotectonica et Metallogenia, v. 36, no. 4, p. 559-571.
Kuang, Y. S., Wei, X., Hong, L. B., Ma, J. L., Pang, C. J., Zhong, Y. T., Zhao, J. X., and Xu, Y. G., 2012b, Petrogenetic evaluation of the Laohutai basalts from North China Craton: Melting of a two-component source during lithospheric thinning in the late Cretaceous–early Cenozoic: Lithos, v. 154, p. 68-82.
Lan, T.-G., Fan, H.-R., Santosh, M., Hu, F.-F., Yang, K.-F., Yang, Y.-H., and Liu, Y., 2013, Crust–mantle interaction beneath the Luxi Block, eastern North China Craton: Evidence from coexisting mantle- and crust-derived enclaves in a quartz monzonite pluton: Lithos, v. 177, p. 1-16.
Li, J., Qian, Y., Sun, J., Li, H., Zhao, C., Sun, F., and Shen, Y., 2021, Early Cretaceous granitoids and gabbro in the Liaodong Peninsula: implications for delamination of the North China Craton and Paleo-Pacific Plate subduction: Mineralogy and Petrology, v. 115, no. 3, p. 299-322.
Li, X.-Y., Li, S.-Z., Suo, Y.-H., Somerville, I. D., Huang, F., Liu, X., Wang, P.-C., Han, Z.-X., and Jin, L.-J., 2018, Early Cretaceous diabases, lamprophyres and andesites-dacites in western Shandong, North China Craton: Implications for local delamination and Paleo-Pacific slab rollback: Journal of Asian Earth Sciences, v. 160, p. 426-444.
Liang, Y., Liu, X., Wang, Q., Zhao, R., and Ma, Y., 2020, Late Mesozoic magmatism in the Jiaodong Peninsula, East China: Implications for crust–mantle interactions and lithospheric thinning of the eastern North China Craton: Geoscience Frontiers, v. 11, no. 3, p. 895-914.
Liu, A.-K., Chen, B., Suzuki, K., and Liu, L., 2010, Petrogenesis of the Mesozoic Zijinguan mafic pluton from the Taihang Mountains, North China Craton: Petrological and Os–Nd–Sr isotopic constraints: Journal of Asian Earth Sciences, v. 39, no. 4, p. 294-308.
Liu, S.-A., Li, S., Guo, S., Hou, Z., and He, Y., 2012, The Cretaceous adakitic–basaltic–granitic magma sequence on south-eastern margin of the North China Craton: Implications for lithospheric thinning mechanism: Lithos, v. 134-135, p. 163-178.
Liu, S., Hu, R., Gao, S., Feng, C., Feng, G., Qi, Y., Coulson, I. M., Yang, Y., Yang, C., and Tang, L., 2011, Geochemical and isotopic constraints on the age and origin of mafic dikes from eastern Shandong Province, eastern North China Craton: International Geology Review, v. 54, no. 12, p. 1389-1400.
Liu, S., Hu, R., Gao, S., Feng, C., Qi, L., Zhong, H., Xiao, T., Qi, Y., Wang, T., and Coulson, I. M., 2008a, Zircon U–Pb geochronology and major, trace elemental and Sr–Nd–Pb isotopic geochemistry of mafic dykes in western Shandong Province, east China: Constrains on their petrogenesis and geodynamic significance: Chemical Geology, v. 255, no. 3-4, p. 329-345.
Liu, S., Hu, R., Gao, S., Feng, C., Yu, B., Feng, G., Qi, Y., Wang, T., and Coulson, I. M., 2009, Petrogenesis of Late Mesozoic mafic dykes in the Jiaodong Peninsula, eastern North China Craton and implications for the foundering of lower crust: Lithos, v. 113, no. 3-4, p. 621-639.
Liu, S., Zou, H., Hu, R., Zhao, J., and Feng, C., 2006, Mesozoic mafic dikes from the Shandong Peninsula, North China Craton: Petrogenesis and tectonic implications: Geochemical Journal, v. 40, no. 2, p. 181-195.
Liu, Y., Gao, S., Kelemen, P. B., and Xu, W., 2008b, Recycled crust controls contrasting source compositions of Mesozoic and Cenozoic basalts in the North China Craton: Geochimica et Cosmochimica Acta, v. 72, no. 9, p. 2349-2376.
Liu, Y., Wei, J., Zhang, D., Chen, J., and Zhang, X., 2020, Early Cretaceous Wulong intermediate-mafic dike swarms in the Liaodong Peninsula: Implications for rapid lithospheric delamination of the North China Craton: Lithos, v. 362-363.
Lu, S., Pei, F., Zhou, Q., Jin, K., Peng, Y., Chen, Y., and Xu, W., 2012, Origin of Late Mesozoic alkaline basalts and nature of lithospheric mantle in Liaoyuan area, Jilin Province: Earth Science–Journal of China University of Geosciences, v. 37, p. 475-488.
Ma, J., and Xu, Y., 2004, Petrology and geochemistry of the Cenozoic basalts from Yangyuan of Hebei Province and Datong of Shanxi Province: Implications for the deep process in the western North China Craton: Geochimica, v. 33, no. 1, p. 75-88.
Ma, L., Jiang, S.-Y., Hofmann, A. W., Dai, B.-Z., Hou, M.-L., Zhao, K.-D., Chen, L.-H., Li, J.-W., and Jiang, Y.-H., 2014a, Lithospheric and asthenospheric sources of lamprophyres in the Jiaodong Peninsula: A consequence of rapid lithospheric thinning beneath the North China Craton?: Geochimica et Cosmochimica Acta, v. 124, p. 250-271.
Ma, L., Jiang, S.-Y., Hofmann, A. W., Xu, Y.-G., Dai, B.-Z., and Hou, M.-L., 2016, Rapid lithospheric thinning of the North China Craton: New evidence from cretaceous mafic dikes in the Jiaodong Peninsula: Chemical Geology, v. 432, p. 1-15.
Ma, L., Jiang, S.-Y., Hou, M.-L., Dai, B.-Z., Jiang, Y.-H., Yang, T., Zhao, K.-D., Pu, W., Zhu, Z.-Y., and Xu, B., 2014b, Geochemistry of Early Cretaceous calc-alkaline lamprophyres in the Jiaodong Peninsula: Implication for lithospheric evolution of the eastern North China Craton: Gondwana Research, v. 25, no. 2, p. 859-872.
Pang, C.-J., Wang, X.-C., Xu, Y.-G., Wen, S.-N., Kuang, Y.-S., and Hong, L.-B., 2015, Pyroxenite-derived Early Cretaceous lavas in the Liaodong Peninsula: Implication for metasomatism and thinning of the lithospheric mantle beneath North China Craton: Lithos, v. 227, p. 77-93.
Pei, F.-P., Xu, W.-L., Yang, D.-B., Yu, Y., Wang, W., and Zhao, Q.-G., 2011, Geochronology and geochemistry of Mesozoic mafic–ultramafic complexes in the southern Liaoning and southern Jilin provinces, NE China: Constraints on the spatial extent of destruction of the North China Craton: Journal of Asian Earth Sciences, v. 40, no. 2, p. 636-650.
Qian, S.-P., Ren, Z.-Y., Richard, W., Zhang, L., Zhang, Y.-H., Hong, L.-B., Ding, X.-L., and Wu, Y.-D., 2017, Petrogenesis of Early Cretaceous basaltic lavas from the North China Craton: Implications for cratonic destruction: Journal of Geophysical Research: Solid Earth.
Qian, S.-P., Ren, Z.-Y., Zhang, L., Hong, L.-B., and Liu, J.-Q., 2015, Chemical and Pb isotope composition of olivine-hosted melt inclusions from the Hannuoba basalts, North China Craton: Implications for petrogenesis and mantle source: Chemical Geology, v. 401, p. 111-125.
Sakuyama, T., Tian, W., Kimura, J.-I., Fukao, Y., Hirahara, Y., Takahashi, T., Senda, R., Chang, Q., Miyazaki, T., Obayashi, M., Kawabata, H., and Tatsumi, Y., 2013, Melting of dehydrated oceanic crust from the stagnant slab and of the hydrated mantle transition zone: Constraints from Cenozoic alkaline basalts in eastern China: Chemical Geology, v. 359, p. 32-48.
Sun, P., Guo, P., and Niu, Y., 2021, Eastern China continental lithosphere thinning is a consequence of paleo-Pacific plate subduction: A review and new perspectives: Earth-Science Reviews, v. 218.
Sun, P., Niu, Y., Guo, P., Duan, M., Wang, X., Gong, H., and Xiao, Y., 2020, The Lithospheric Thickness Control on the Compositional Variation of Continental Intraplate Basalts: A Demonstration Using the Cenozoic Basalts and Clinopyroxene Megacrysts From Eastern China: Journal of Geophysical Research: Solid Earth, v. 125, no. 3.
Tang, H., Zheng, J., Yu, C., Ping, X., and Ren, H., 2014, Multistage crust–mantle interactions during the destruction of the North China Craton: Age and composition of the Early Cretaceous intrusions in the Jiaodong Peninsula: Lithos, v. 190-191, p. 52-70.
Teng, X.-M., Santosh, M., and Tang, L. I., 2017, The Early Cretaceous Shangzhuang layered mafic intrusion and its bearing on decratonization of the North China Craton: Geological Magazine, v. 155, no. 7, p. 1475-1506.
Wan, L., Zeng, Z., Kusky, T., Asimow, P., He, C., Liu, Y., Yang, S., and Xu, S., 2019, Geochemistry of middle-late Mesozoic mafic intrusions in the eastern North China Craton: New insights on lithospheric thinning and decratonization: Gondwana Research, v. 73, p. 153-174.
Wang, X., Wang, Z., Cheng, H., Foley, S., Xiong, L., and Hu, Z., 2020a, Early cretaceous lamprophyre dyke swarms in Jiaodong Peninsula, eastern North China Craton, and implications for mantle metasomatism related to subduction: Lithos, v. 368-369.
Wang, X., Xiao, Y., Sun, H., Wang, Y., Liu, J., Yang, K., Gu, H., Hou, Z., Tian, Y., Wu, W., and Ma, Y., 2020b, Initiation of the North China Craton destruction: Constraints from the diamond-bearing alkaline basalts from Lan'gan, China: Gondwana Research, v. 80, p. 228-243.
Wang, Y., Fan, W., Zhang, H., and Peng, T., 2006, Early Cretaceous gabbroic rocks from the Taihang Mountains: Implications for a paleosubduction-related lithospheric mantle beneath the central North China Craton: Lithos, v. 86, no. 3-4, p. 281-302.
Wang, Y., Zhao, Z.-F., Zheng, Y.-F., and Zhang, J.-J., 2011, Geochemical constraints on the nature of mantle source for Cenozoic continental basalts in east-central China: Lithos, v. 125, no. 3-4, p. 940-955.
Wang, Z., Zhao, Y., Zou, H., Li, W., Liu, X., Wu, H., Xu, G., and Zhang, S., 2007, Petrogenesis of the Early Jurassic Nandaling flood basalts in the Yanshan belt, North China Craton: A correlation between magmatic underplating and lithospheric thinning: Lithos, v. 96, no. 3-4, p. 543-566.
Xiong, L. E., Wei, J., Shi, W., Fu, L., Li, H., Zhou, H., Chen, J., and Chen, M., 2017, Geochronology, petrology and geochemistry of the Mesozoic Dashizhuzi granites and lamprophyre dykes in eastern Hebei – western Liaoning: implications for lithospheric evolution beneath the North China Craton: Geological Magazine, v. 155, no. 7, p. 1542-1565.
Xu, H., Song, Y., Ye, K., Zhang, J., and Wang, H., 2012, Petrogenesis of mafic dykes and high-Mg adakitic enclaves in the Late Mesozoic Fangshan low-Mg adakitic pluton, North China Craton: Journal of Asian Earth Sciences, v. 54-55, p. 143-161.
Xu, Y.-G., Ma, J.-L., Huang, X.-L., Iizuka, Y., Chung, S.-L., Wang, Y.-B., and Wu, X.-Y., 2004, Early Cretaceous gabbroic complex from Yinan, Shandong Province: petrogenesis and mantle domains beneath the North China Craton: International Journal of Earth Sciences, v. 93, no. 6, p. 1025-1041.
Xue, F., Santosh, M., Tsunogae, T., and Yang, F., 2019, Geochemical and isotopic imprints of early cretaceous mafic and felsic dyke suites track lithosphere-asthenosphere interaction and craton destruction in the North China Craton: Lithos, v. 326-327, p. 174-199.
Yan, J., Chen, J., Me, Z., Gao, T., Foland, K., Zhang, X., and Liu, M., 2005, Studies on petrology and geochemistry of the Later Cretaceous basalts and mantle-derived xenoliths from eastern Shandong: Acta Petrologica Sinica, v. 21, no. 1, p. 99-112.
Yang, C., Xu, W., Yang, D., Wang, W., Wang, W., and Liu, J., 2008, Petrogenesis of Shangyu gabbro-diorites in western Shandong: Geochronological and geochemical evidence: Science in China Series D: Earth Sciences, v. 51, no. 4, p. 481-492.
Yang, J.-H., Chung, S.-L., Zhai, M.-G., and Zhou, X.-H., 2004, Geochemical and Sr–Nd–Pb isotopic compositions of mafic dikes from the Jiaodong Peninsula, China: evidence for vein-plus-peridotite melting in the lithospheric mantle: Lithos, v. 73, no. 3-4, p. 145-160.
Yang, Q.-L., Zhao, Z.-F., and Zheng, Y.-F., 2012a, Modification of subcontinental lithospheric mantle above continental subduction zone: Constraints from geochemistry of Mesozoic gabbroic rocks in southeastern North China: Lithos, v. 146-147, p. 164-182.
Yang, Q.-L., Zhao, Z.-F., and Zheng, Y.-F., 2012b, Slab–mantle interaction in continental subduction channel: Geochemical evidence from Mesozoic gabbroic intrusives in southeastern North China: Lithos, v. 155, p. 442-460.
Yang, W., and Li, S., 2008, Geochronology and geochemistry of the Mesozoic volcanic rocks in Western Liaoning: Implications for lithospheric thinning of the North China Craton: Lithos, v. 102, no. 1-2, p. 88-117.
Ying, J., Zhang, H., Sun, M., Tang, Y., Zhou, X., and Liu, X., 2007, Petrology and geochemistry of Zijinshan alkaline intrusive complex in Shanxi Province, western North China Craton: Implication for magma mixing of different sources in an extensional regime: Lithos, v. 98, no. 1-4, p. 45-66.
Ying, J., Zhou, X., and Zhang, H., 2005, The geochemical variations of mid-Cretaceous lavas across western Shandong Province, China and their tectonic implications: International Journal of Earth Sciences, v. 95, no. 1, p. 68-79.
Yuan, H., Liu, X., Liu, Y., Gao, S., and Ling, W., 2006, Geochemistry and U-Pb zircon geochronology of Late-Mesozoic lavas from Xishan, Beijing: Science in China Series D, v. 49, no. 1, p. 50-67.
Zhang, H.-F., Sun, M., Zhou, X.-H., Fan, W.-M., Zhai, M.-G., and Yin, J.-F., 2002, Mesozoic lithosphere destruction beneath the North China Craton: evidence from major-, trace-element and Sr–Nd–Pb isotope studies of Fangcheng basalts: Contributions to Mineralogy and Petrology, v. 144, no. 2, p. 241-254.
Zhang, H.-F., Sun, M., Zhou, X.-H., Zhou, M.-F., Fan, W.-M., and Zheng, J.-P., 2003, Secular evolution of the lithosphere beneath the eastern North China Craton: evidence from Mesozoic basalts and high-Mg andesites: Geochimica et Cosmochimica Acta, v. 67, no. 22, p. 4373-4387.
Zhang, H., and Zheng, J., 2003, Geochemical characteristics and petrogenesis of Mesozoic basalts from the North China Craton: a case study in Fuxin, Liaoning Province: Chinese Science Bulletin, v. 48, no. 9, p. 924-930.
Zhang, J., Zhang, H.-f., Ying, J.-f., Tang, Y.-j., and Niu, L.-f., 2008, Contribution of subducted Pacific slab to Late Cretaceous mafic magmatism in Qingdao region, China: A petrological record: Island Arc, v. 17, no. 2, p. 231-241.
Zhang, J., Zhao, Z.-F., Zheng, Y.-F., Liu, X., and Xie, L., 2012, Zircon Hf–O isotope and whole-rock geochemical constraints on origin of postcollisional mafic to felsic dykes in the Sulu orogen: Lithos, v. 136-139, p. 225-245.
Zhang, L., Liu, T., Shen, Y., Zeng, Q., and Li, G., 2010, Structure, Isotopes, and40Ar/39Ar Dating of the Pengjiakuang Gold Deposit, Mesozoic Jiaolai Basin, Eastern China: International Geology Review, v. 45, no. 8, p. 691-711.
Zhang, Z., Qin, J., Lai, S., Long, X., Zhang, H., Ju, Y., Zhu, Y., Wang, J., and Wang, X., 2019, Early Cretaceous granodiorite and its mafic enclaves from the Shuiyu area (Southern North China Craton): implications for crust–mantle interaction: International Geology Review, v. 62, no. 17, p. 2221-2237.
Zhao, Z.-F., Zheng, Y.-F., Wei, C.-S., Wu, Y.-B., Chen, F., and Jahn, B.-m., 2005, Zircon U–Pb age, element and C–O isotope geochemistry of post-collisional mafic-ultramafic rocks from the Dabie orogen in east-central China: Lithos, v. 83, no. 1-2, p. 1-28.
Zhou, H., Pei, F.-P., Xu, W.-L., Wei, J.-Y., and Wang, Y.-P., 2021, Petrogenesis of Early Cretaceous volcanic rocks of the northeastern North China Craton: Constraints from elemental and Sr–Nd–Pb isotope geochemistry: Lithos, v. 392-393.
Zou, H., Zindler, A., Xu, X., and Qi, Q., 2000, Major, trace element, and Nd, Sr and Pb isotope studies of Cenozoic basalts in SE China: mantle sources, regional variations, and tectonic significance: Chemical Geology, v. 171, no. 1-2, p. 33-47.

## Sheet: Felsic magma references
REFERENCES
Bo, Z., Shangguo, S., Xuanxue, M., Shaochong, F., Yue, W., Xiao, J., Yanfang, F., and Jiangtao, L., 2020, Magmatic response to lithospheric thinning of the North China Craton: Evidence from porphyritic aegirite-bearing syenite in Wuan, Hebei: China [J/OL]. Earth Science Frontiers,[2020-01-22], p. 1-14.
CUI, F., XU, X., ZHENG, C., YAO, W., and SHI, L., 2020, The Paleo-Pacific plate subduction and slab roll-back beneath eastern North China Craton: Insights from the Late Mesozoic granitoids in Xingcheng area, western Liaoning Province: Acta Petrologica Sinica, v. 36, no. 8, p. 2463-2492.
Ding, D., Chen, L., Gong, E., and Zhao, X., 2019, Zircon U-Pb age, geochemical, and Sr-Nd-O isotopic constraints on the origin of the youngest Mesozoic adakitic dikes in Jiaodong peninsula, North China Craton: implications for Early Cretaceous crustal evolution: International Geology Review, v. 62, no. 4, p. 446-464.
Duan, X., Zeng, Q., Yang, J., Liu, J., Wang, Y., and Zhou, L., 2014, Geochronology, geochemistry and Hf isotope of Late Triassic magmatic rocks of Qingchengzi district in Liaodong peninsula, Northeast China: Journal of Asian Earth Sciences, v. 91, p. 107-124.
Fan, W., Jiang, N., Xu, X., Hu, J., and Zong, K., 2017, Petrogenesis of the middle Jurassic appinite and coeval granitoids in the Eastern Hebei area of North China Craton: Lithos, v. 278-281, p. 331-346.
Feng, Y., Yang, J., Sun, J., and Zhang, J., 2020, Material records for Mesozoic destruction of the North China Craton by subduction of the Paleo-Pacific slab: Science China Earth Sciences, v. 63, no. 5, p. 690-700.
Gao, X.-Y., Zhao, T.-P., and Chen, W.-T., 2014, Petrogenesis of the early Cretaceous Funiushan granites on the southern margin of the North China Craton: Implications for the Mesozoic geological evolution: Journal of Asian Earth Sciences, v. 94, p. 28-44.
Gao, X., Zhao, T., Gao, J., Xue, L., and Yuan, Z., 2012a, LA-ICP-MS zircon U-Pb ages, Hf isotopic composition and geochemistry of adakitic granites in the Xiaoqinling region, the south margin of the North China block: Geochimica, v. 41, no. 4, p. 303-325.
Gao, X., Zhao, T., Yuan, Z., Zhou, Y., and Gao, J., 2010, Geochemistry and petrogenesis of the Heyu batholith in the southern margin of the North China block: Acta Petrologica Sinica, v. 26, no. 12, p. 3485-3506.
Gao, Y., Santosh, M., Hou, Z., Wei, R., Ma, G., Chen, Z., and Wu, J., 2012b, High Sr/Y magmas generated through crystal fractionation: Evidence from Mesozoic volcanic rocks in the northern Taihang orogen, North China Craton: Gondwana Research, v. 22, no. 1, p. 152-168.
Goss, S. C., Wilde, S. A., Wu, F., and Yang, J., 2010, The age, isotopic signature and significance of the youngest Mesozoic granitoids in the Jiaodong Terrane, Shandong Province, North China Craton: Lithos, v. 120, no. 3-4, p. 309-326.
Gu, H.-O., Xiao, Y., Santosh, M., Li, W.-Y., Yang, X., Pack, A., and Hou, Z., 2013, Spatial and temporal distribution of Mesozoic adakitic rocks along the Tan-Lu fault, Eastern China: Constraints on the initiation of lithospheric thinning: Lithos, v. 177, p. 352-365.
He, X.-F., and Santosh, M., 2014, Crustal recycling through intraplate magmatism: Evidence from the Trans-North China Orogen: Journal of Asian Earth Sciences, v. 95, p. 147-163.
He, X., Zhong, H., Zhao, Z., Tan, S., Zhu, W., Yang, S., Hu, W., Tang, Z., and Bao, C., 2018, U-Pb Geochronology, Elemental and Sr-Nd Isotopic Geochemistry of the Houyaoyu Granite Porphyries: Implication for the Genesis of Early Cretaceous Felsic Intrusions in East Qinling: Journal of Earth Science, v. 29, no. 4, p. 920-938.
Jiang, N., Liu, Y., Zhou, W., Yang, J., and Zhang, S., 2007, Derivation of Mesozoic adakitic magmas from ancient lower crust in the North China craton: Geochimica et Cosmochimica Acta, v. 71, no. 10, p. 2591-2608.
Lan, T.-G., Fan, H.-R., Santosh, M., Hu, F.-F., Yang, K.-F., Yang, Y.-H., and Liu, Y., 2012, Early Jurassic high-K calc-alkaline and shoshonitic rocks from the Tongshi intrusive complex, eastern North China Craton: Implication for crust–mantle interaction and post-collisional magmatism: Lithos, v. 140-141, p. 183-199.
Li, C., Yan, J., Wang, A.-G., Liu, J.-M., and Li, Z.-S., 2020, Petrogenesis of Cretaceous granitoids in the Bengbu–Wuhe area, southeastern North China Craton: Implications for gold mineralization: Ore Geology Reviews, v. 126.
Li, H., Ling, M.-x., Ding, X., Zhang, H., Li, C.-y., Liu, D.-y., and Sun, W.-d., 2014, The geochemical characteristics of Haiyang A-type granite complex in Shandong, eastern China: Lithos, v. 200-201, p. 142-156.
Li, J., Qian, Y., Sun, J., Li, H., Zhao, C., Sun, F., and Shen, Y., 2021, Early Cretaceous granitoids and gabbro in the Liaodong Peninsula: implications for delamination of the North China Craton and Paleo-Pacific Plate subduction: Mineralogy and Petrology, v. 115, no. 3, p. 299-322.
Li, Q., Santosh, M., Li, S.-R., and Zhang, J.-Q., 2015, Petrology, geochemistry and zircon U–Pb and Lu–Hf isotopes of the Cretaceous dykes in the central North China Craton: Implications for magma genesis and gold metallogeny: Ore Geology Reviews, v. 67, p. 57-77.
Li, X.-C., Fan, H.-R., Santosh, M., Hu, F.-F., Yang, K.-F., Lan, T.-G., Liu, Y., and Yang, Y.-H., 2012, An evolving magma chamber within extending lithosphere: An integrated geochemical, isotopic and zircon U–Pb geochronological study of the Gushan granite, eastern North China Craton: Journal of Asian Earth Sciences, v. 50, p. 27-43.
Li, X.-H., Fan, H.-R., Hu, F.-F., Hollings, P., Yang, K.-F., and Liu, X., 2019a, Linking lithospheric thinning and magmatic evolution of late Jurassic to early cretaceous granitoids in the Jiaobei Terrane, southeastern North China Craton: Lithos, v. 324-325, p. 280-296.
Li, X.-H., Fan, H.-R., Santosh, M., Yang, K.-F., Peng, H.-W., Hollings, P., and Hu, F.-F., 2019b, Mesozoic felsic dikes in the Jiaobei Terrane, southeastern North China Craton: Constraints from zircon geochronology and geochemistry, and implications for gold metallogeny: Journal of Geochemical Exploration, v. 201, p. 40-55.
Li, X.-Y., Li, S.-Z., Suo, Y.-H., Somerville, I. D., Huang, F., Liu, X., Wang, P.-C., Han, Z.-X., and Jin, L.-J., 2018, Early Cretaceous diabases, lamprophyres and andesites-dacites in western Shandong, North China Craton: Implications for local delamination and Paleo-Pacific slab rollback: Journal of Asian Earth Sciences, v. 160, p. 426-444.
Liu, J., Zhang, J., Liu, Z., Yin, C., Zhao, C., and Peng, Y., 2018a, Petrogenesis of Jurassic granitoids at the northeastern margin of the North China Craton: New geochemical and geochronological constraints on subduction of the Paleo-Pacific Plate: Journal of Asian Earth Sciences, v. 158, p. 287-300.
Liu, S., Feng, C., Fan, Y., Tai, K., Gao, T., and Coulson, I. M., 2020, Geochemical constraints on the origin of Early Cretaceous alkaline intrusions and its tectonic implication, Sulu Orogenic Belt, Eastern North China Craton: Acta Geochimica, v. 39, no. 5, p. 616-641.
Liu, X., Deng, J., Liang, Y., Wang, Q., Pan, R., Qin, C., and Yang, Y., 2018b, Petrogenesis of Early Cretaceous intermediate-felsic dikes in the Jiaodong Peninsula, south-eastern North China Craton: Constraints from geochronology, geochemistry and Sr-Nd-Pb-Hf isotopes: Gondwana Research, v. 60, p. 69-93.
Nie, Z., Wang, X., Ke, C., Yang, Y., and Lv, X., 2015, Age, geochemistry and petrogenesis of Huashan granitonid pluton on the southern margin of the North China Block: Geological Bulletin of China, v. 34, no. 8, p. 1502-1516.
Pei, F.-P., Xu, W.-L., Yang, D.-B., Yu, Y., Meng, E., and Zhao, Q.-G., 2011, Petrogenesis of late Mesozoic granitoids in southern Jilin province, northeastern China: Geochronological, geochemical, and Sr–Nd–Pb isotopic evidence: Lithos, v. 125, no. 1-2, p. 27-39.
Qiuju, Q., Xiaoxia, W., Changhui, K., and JinBao, L., 2012, Geochronology and origin of the Laoniushan complex in the southern margin of North China Block and their implications: New evidences from zircon dating, Hf isotopes and geochemistry: Acta Petrologica Sinica, v. 28, no. 1, p. 279-301.
Sun, J.-F., Yang, J.-H., Wu, F.-Y., Li, X.-H., Yang, Y.-H., Xie, L.-W., and Wilde, S. A., 2010, Magma mixing controlling the origin of the Early Cretaceous Fangshan granitic pluton, North China Craton: In situ U–Pb age and Sr-, Nd-, Hf- and O-isotope evidence: Lithos, v. 120, no. 3-4, p. 421-438.
Sun, J.-F., Zhang, J.-H., Yang, J.-H., Zhu, Y.-S., Chen, J.-Y., and Ling-Hu, M.-M., 2021, Multi-stage Jurassic magmatism in the Liaodong Peninsula: Constraints on crustal evolution beneath the eastern North China Craton: Lithos, v. 402-403.
Sun, J., Liu, Z., Zhang, S., Li, X., and Qi, J., 2017, Large-scale removal of lithosphere underneath the North China Craton in the Early Cretaceous: Geochemical constraints from volcanic lavas in the Bohai Bay Basin: Lithos, v. 292-293, p. 69-80.
Tang, H., Zheng, J., Yu, C., Ping, X., and Ren, H., 2014, Multistage crust–mantle interactions during the destruction of the North China Craton: Age and composition of the Early Cretaceous intrusions in the Jiaodong Peninsula: Lithos, v. 190-191, p. 52-70.
Tao, J., Zhang, C., Ma, C., Yang, K., and Zhou, H., 2006, Geochemistry and petrogenesis of Cretaceous high Sr and low Y granodiorite pluton in Fangshan area, Beijing: Geological Science and Technology Information, v. 25, p. 11-18.
Teng, G., Liu, S., Wang, M., and Bao, H., 2020, Petrogenesis and tectonic implications of the Mesozoic granitoid intrusions in the eastern Liaoning Peninsula, NE China: Journal of Asian Earth Sciences, v. 195.
Wang, C., Song, S., Niu, Y., Allen, M. B., Su, L., Wei, C., Zhang, G., and Fu, B., 2017, Long-lived melting of ancient lower crust of the North China Craton in response to paleo-Pacific plate subduction, recorded by adakitic rhyolite: Lithos, v. 292-293, p. 437-451.
Wang, X.-C., Liu, Y.-S., and Liu, X.-M., 2006, Mesozoic adakites in the Lingqiu Basin of the central North China Craton: Partial melting of underplated basaltic lower crust: Geochemical Journal, v. 40, no. 5, p. 447-461.
Wu, F.-Y., Yang, J.-H., Wilde, S. A., and Zhang, X.-O., 2005, Geochronology, petrogenesis and tectonic implications of Jurassic granites in the Liaodong Peninsula, NE China: Chemical Geology, v. 221, no. 1-2, p. 127-156.
Xiaolu, N., Bin, C., and Xu, M., 2011, Petrogenesis of the Dengzhazi A-type pluton from the Taihang–Yanshan Mesozoic orogenic belts, North China Craton: Journal of Asian Earth Sciences, v. 41, no. 2, p. 133-146.
Xiaoxia, W., Tao, W., Qiuju, Q., and Shan, L., 2011, Temporal-spatial variations, origin and their tectonic significance of the Late Mesozoic granites in the Qinling, Central China: Acta Petrologica Sinica, v. 27, no. 6, p. 1573-1593.
Xu, H., Song, Y., Ye, K., Zhang, J., and Wang, H., 2012, Petrogenesis of mafic dykes and high-Mg adakitic enclaves in the Late Mesozoic Fangshan low-Mg adakitic pluton, North China Craton: Journal of Asian Earth Sciences, v. 54-55, p. 143-161.
Xu, Y. G., Huang, X.-L., Ma, J.-L., Wang, Y.-B., Iizuka, Y., Xu, J.-F., Wang, Q., and Wu, X.-Y., 2004, Crust-mantle interaction during the tectono-thermal reactivation of the North China Craton: constraints from SHRIMP zircon U–Pb chronology and geochemistry of Mesozoic plutons from western Shandong: Contributions to Mineralogy and Petrology, v. 147, no. 6, p. 750-767.
Xue, F., Santosh, M., Tsunogae, T., and Yang, F., 2019, Geochemical and isotopic imprints of early cretaceous mafic and felsic dyke suites track lithosphere-asthenosphere interaction and craton destruction in the North China Craton: Lithos, v. 326-327, p. 174-199.
Yang, C., Chen, H., Zhao, L., Jiang, H., Wang, D., Zheng, H., Han, J., Wu, C., and Lai, C., 2020, Multiphase magmatic overprinting in the Late Jurassic Laoniushan pluton at the SW margin of the North China Craton: Geochronological and petrogenetic constraints: Geological Journal, v. 55, no. 10, p. 6732-6748.
Yang, C., Zhao, L., Zheng, H., and Wang, D., 2019, The multiple granitic magmatism in the giant Huayangchuan uranium polymetallic ore district: Implications for tectonic evolution of the southern margin of North China Craton in the Qinling Orogen: Ore Geology Reviews, v. 112.
Yang, D.-B., Xu, W.-L., Zhao, G.-C., Huo, T.-F., Shi, J.-P., and Yang, H.-T., 2016, Tectonic implications of Early Cretaceous low-Mg adakitic rocks generated by partial melting of thickened lower continental crust at the southern margin of the central North China Craton: Gondwana Research, v. 38, p. 220-237.
Yang, F., Santosh, M., and Tang, L., 2018, Extensive crustal melting during craton destruction: Evidence from the Mesozoic magmatic suite of Junan, eastern North China Craton: Journal of Asian Earth Sciences, v. 157, p. 119-140.
Yang, J.-H., Wu, F.-Y., Chung, S.-L., Wilde, S. A., and Chu, M.-F., 2004, Multiple sources for the origin of granites: Geochemical and Nd/Sr isotopic evidence from the Gudaoling granite and its mafic enclaves, northeast China: Geochimica et Cosmochimica Acta, v. 68, no. 21, p. 4469-4483.
Yang, J.-H., Wu, F.-Y., Chung, S.-L., Wilde, S. A., Chu, M.-F., Lo, C.-H., and Song, B., 2005, Petrogenesis of Early Cretaceous intrusions in the Sulu ultrahigh-pressure orogenic belt, east China and their relationship to lithospheric thinning: Chemical Geology, v. 222, no. 3-4, p. 200-231.
Yang, K.-F., Fan, H.-R., Santosh, M., Hu, F.-F., Wilde, S. A., Lan, T.-G., Lu, L.-N., and Liu, Y.-S., 2012, Reactivation of the Archean lower crust: Implications for zircon geochronology, elemental and Sr–Nd–Hf isotopic geochemistry of late Mesozoic granitoids from northwestern Jiaodong Terrane, the North China Craton: Lithos, v. 146-147, p. 112-127.
Yuan, H., Liu, X., Liu, Y., Gao, S., and Ling, W., 2006, Geochemistry and U-Pb zircon geochronology of Late-Mesozoic lavas from Xishan, Beijing: Science in China Series D, v. 49, no. 1, p. 50-67.
Zhang, H.-F., Sun, M., Zhou, X.-H., and Ying, J.-F., 2005, Geochemical constraints on the origin of Mesozoic alkaline intrusive complexes from the North China Craton and tectonic implications: Lithos, v. 81, no. 1-4, p. 297-317.
Zhang, X.-M., Xu, W.-L., Sun, C.-Y., Wang, F., and Yang, D.-B., 2019a, Geochronology and geochemistry of early Mesozoic magmatism in the northeastern North China Craton: Implications for tectonic evolution: Gondwana Research, v. 67, p. 33-45.
Zhang, Z., Qin, J., Lai, S., Long, X., Zhang, H., Ju, Y., Zhu, Y., Wang, J., and Wang, X., 2019b, Early Cretaceous granodiorite and its mafic enclaves from the Shuiyu area (Southern North China Craton): implications for crust–mantle interaction: International Geology Review, v. 62, no. 17, p. 2221-2237.
Zhao, H.-X., Jiang, S.-Y., Frimmel, H. E., Dai, B.-Z., and Ma, L., 2012, Geochemistry, geochronology and Sr–Nd–Hf isotopes of two Mesozoic granitoids in the Xiaoqinling gold district: Implication for large-scale lithospheric thinning in the North China Craton: Chemical Geology, v. 294-295, p. 173-189.
Zhao, R., Wang, Q., Deng, J., Santosh, M., Liu, X., and Cheng, H., 2018, Late Mesozoic magmatism and sedimentation in the Jiaodong Peninsula: New constraints on lithospheric thinning of the North China Craton: Lithos, v. 322, p. 312-324.
Zhou, H., Pei, F.-P., Xu, W.-L., Wei, J.-Y., and Wang, Y.-P., 2021, Petrogenesis of Early Cretaceous volcanic rocks of the northeastern North China Craton: Constraints from elemental and Sr–Nd–Pb isotope geochemistry: Lithos, v. 392-393.
Zou, S., Xu, D., Deng, T., Huang, Q., Yu, D., Zhao, Z., and Ye, T., 2019, Geochemical variations of the Late Mesozoic granitoids in the southern margin of North China Craton: A possible link to the tectonic transformation from compression to extension: Gondwana Research, v. 75, p. 118-133.

## Sheet: G50803
Chen, H., Tang, M., and Song, S., 2023, Catastrophic craton destruction via wholesale lithosphere delamination: Geology, https://doi.org/10.1130/G50803.1
